# Supplementary material for: Candidate RNA structures for domain 3 of the foot-and-mouth-disease virus internal ribosome entry site
Source: PubMed Central journal article supplement — Nucleic Acids Res. 2012 Dec 26;41(3):1483–95. doi: 10.1093/nar/gks1302 (PMC3561949; doi:10.1093/nar/gks1302), 2012-12-26
Supplement: supp_gks1302_nar-03056-h-2012-File012.pdf [file supp_gks1302_nar-03056-h-2012-File012.pdf]

## Supplementary Material

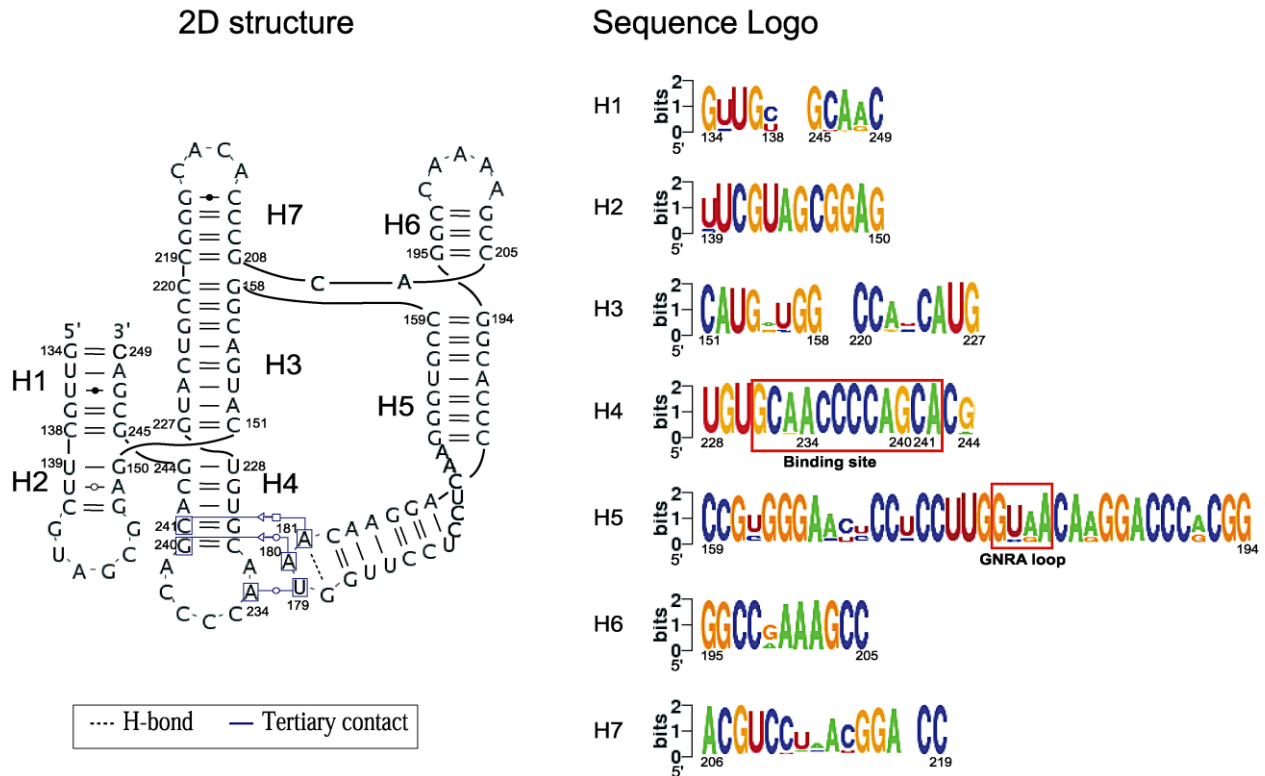

**Figure S1.** Sequence conservation analysis using logo for sequences of the apical region in domain 3 derived from 318 FMDV IRES systems listed in Table S2. The RNA sequence consists of four letters (bases) —A, U, G, and C, and the sequence logos consist of a stack of the four letters quantified by 2 bits (1 bit can describe two possible values) at each position in a sequence. The 2 bit high vertical bar is a measure of the relative frequency of the four letters. While the overall height of a stack indicates a degree of sequence conservation, the height of each letter within the stack shows the relative frequency at each position. At each nucleotide position, most to least frequent bases are placed from top to bottom. Overall, sequence of the junctions is largely conserved. Notably, the bases (in a red box) involved in RNA-RNA long-range interactions between H<sub>4</sub> and H<sub>5</sub> are highly conserved, especially the binding receptor (A<sub>234</sub>, G<sub>240</sub>, and C<sub>241</sub>) of the GNRA loop in H<sub>4</sub> which is nearly perfectly conserved.

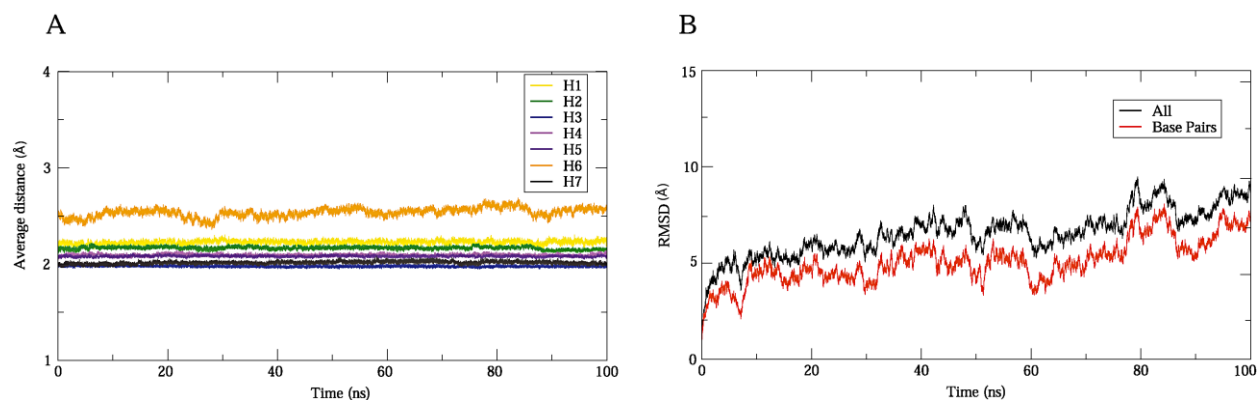

**Figure S2.** Average distance of base pairs in helices (A) and RMSDs of the entire system (116 residues) and only base pairs (82 residues) with respect to the starting structure, respectively (B).

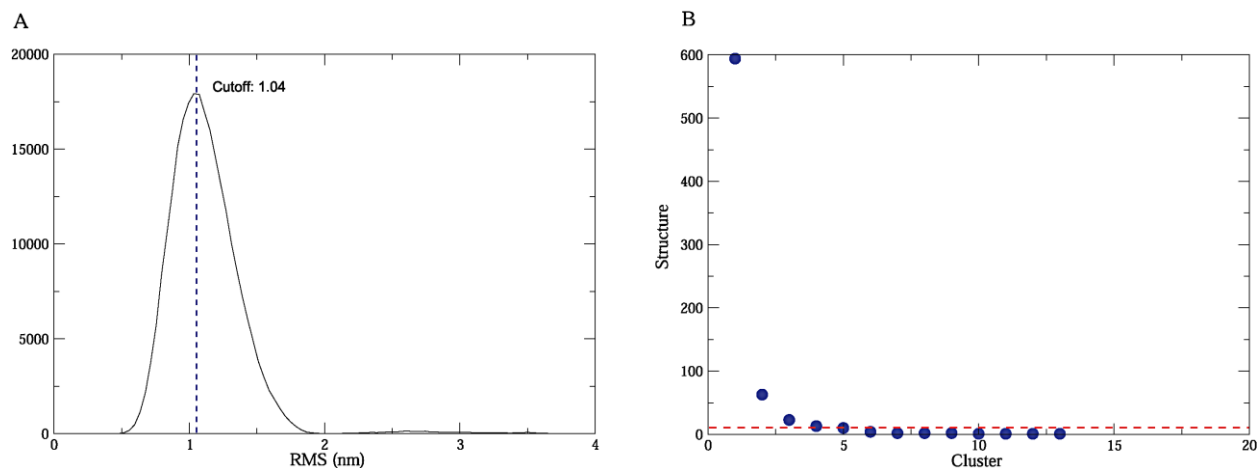

**Figure S3.** RMSD distribution and clustering analysis of the 717 structures based on the basal region,  $G_{86}$  to  $U_{133}$  and  $C_{249}$  to  $C_{299}$ , in domain 3. The 3D models are obtained using 2D information of the basal region in FMDV C-S8 IRES domain 3. With equally distributed 101 bins formed between zero and a maximum RMSD value of 3.97 nm, each RMSD value from either upper or lower triangular RMSD matrix ( $717 \times 717$ ) is put into a right bin. The cutoff value of 1.04 separates the peak (A). Clustering analysis of the 717 structures is based on the overall helical shape of the basal region. The RMSDs of these structures range from 0.44 to 3.97 nm. Thirteen clusters are found, of which the first four clusters contain at least 10 structures (B).

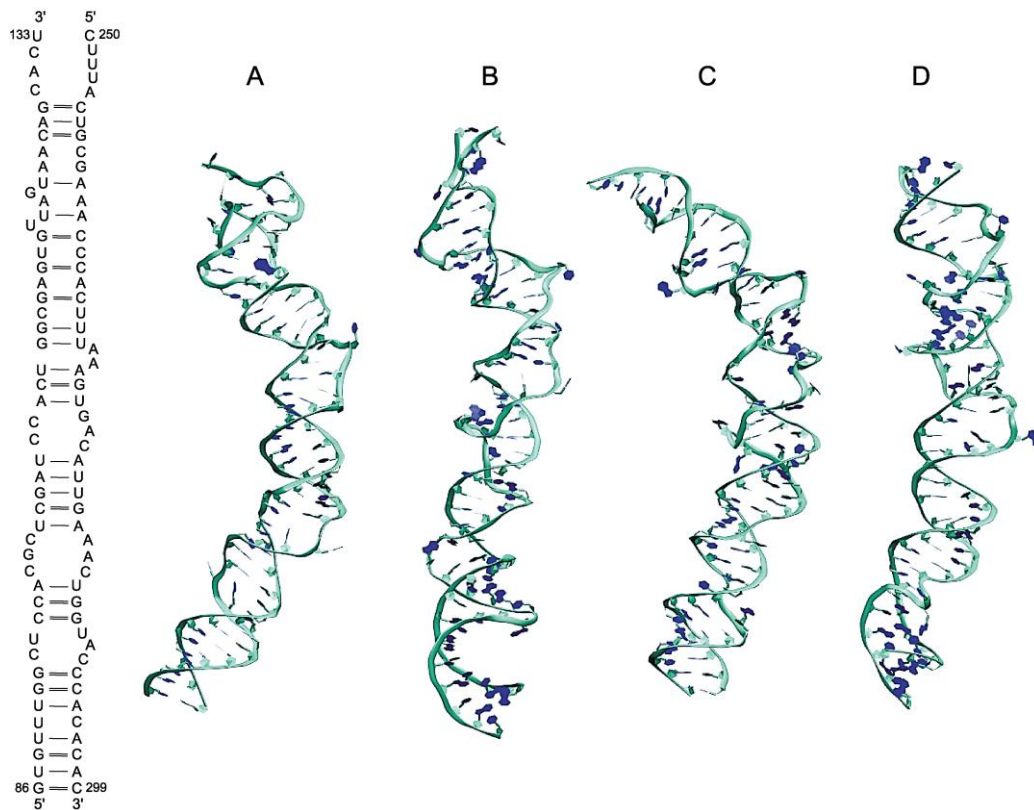

**Figure S4.** Candidate 3D models of the basal region in FMDV IRES domain 3. These four representative models are selected from the first four large clusters containing (A) 594, (B) 64, (C) 23, and (D) 13 structures, respectively (see Fig. S3B). Overall shape and orientation of the helical axis of these four structures are similar with some flexibility (e.g., bending) in unpaired regions.

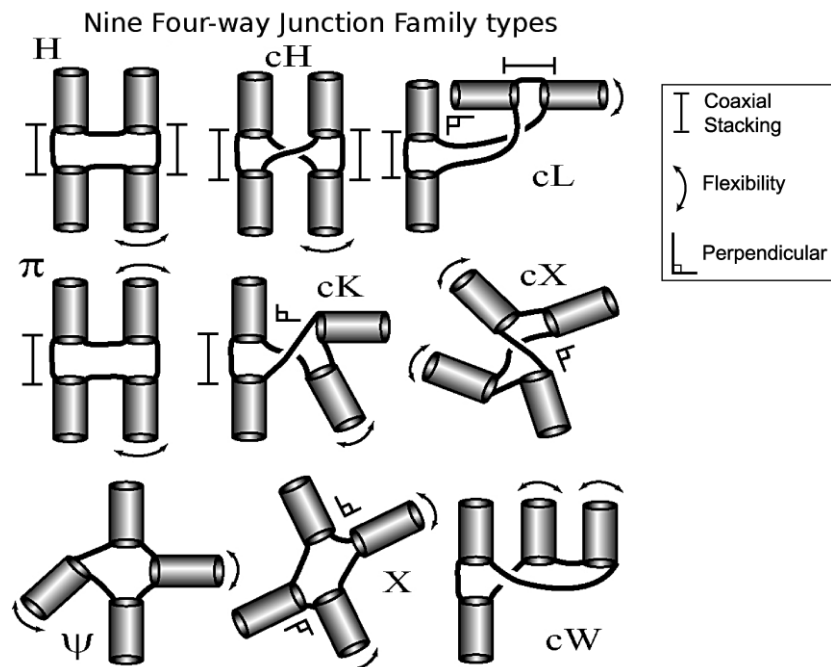

**Figure S5.** Schematic representation of four-way junction families. There are nine families in four-way junction—*H*, *cH*, *cL*, *cK*,  $\pi$ , *cW*,  $\psi$ , *cX* and *X*—mainly determined by coaxial stacking and overall helical arrangements. The three family types, *H*, *cH* and *cL*, contain two coaxial stacking patterns; the coaxially stacked helices in *H* and *cH* are parallel to each other while *cL* has a perpendicular arrangement between coaxially stacked helices requiring relatively long single strands. The other six family types contain either one or no coaxial stacking patterns.

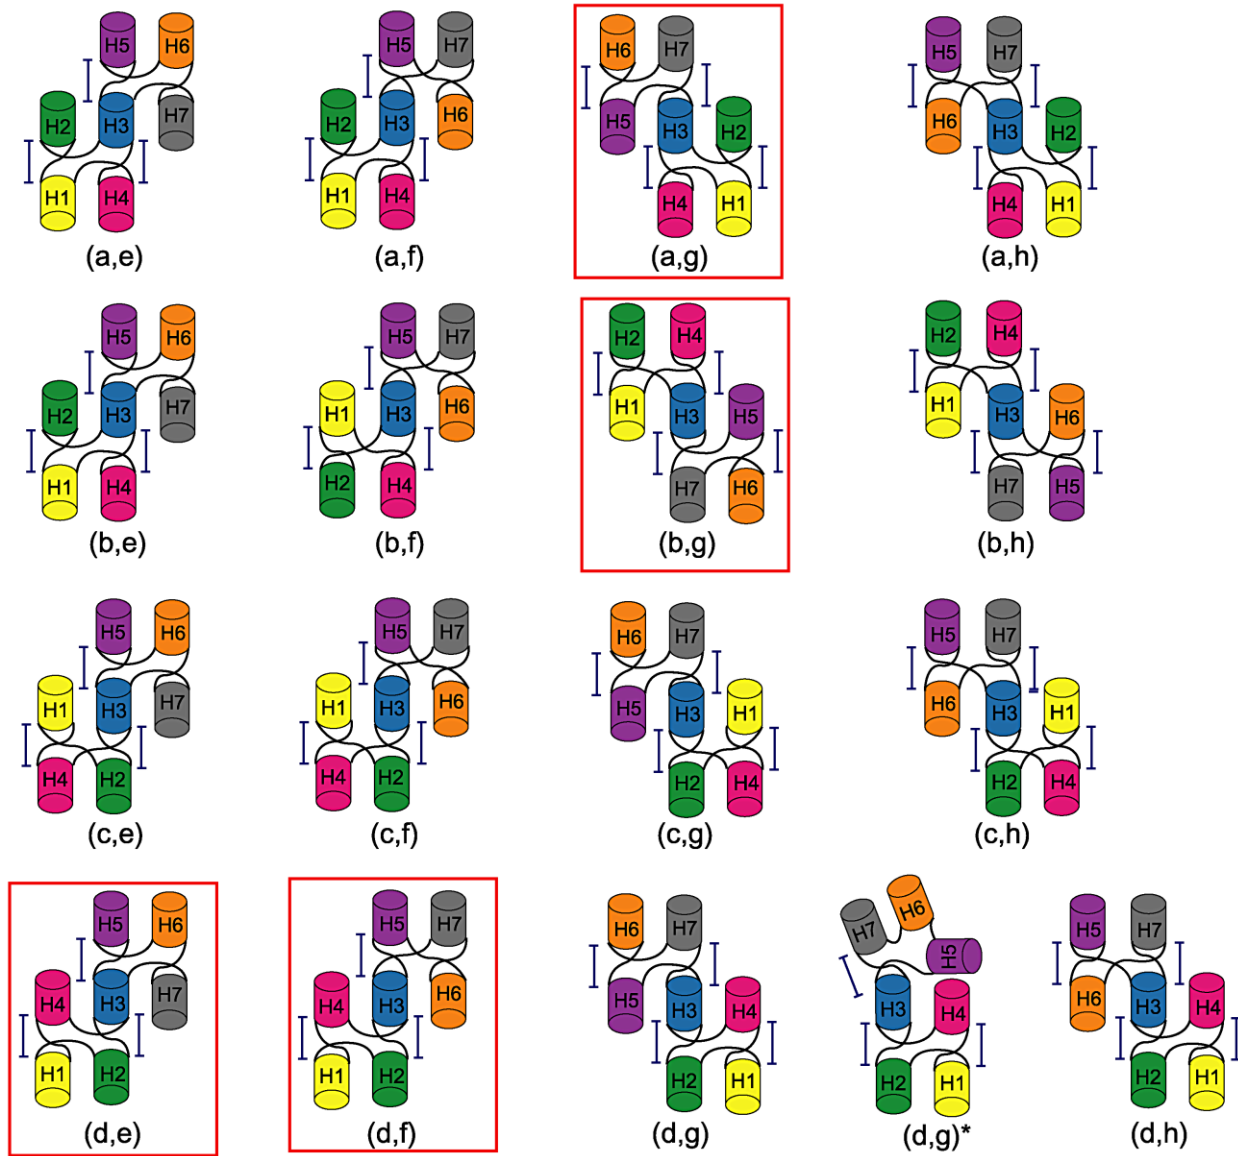

**Figure S6.** 17 combinations of two four-way junction topologies including (d,g)\*, a modified combination of (d,g), with shown in Fig. 4B. The four combinations (a,g), (b,g), (d,e) and (d,f) are highlighted with red box as candidate topologies considering potential long-range interactions between  $H_4$  and  $H_5$ .

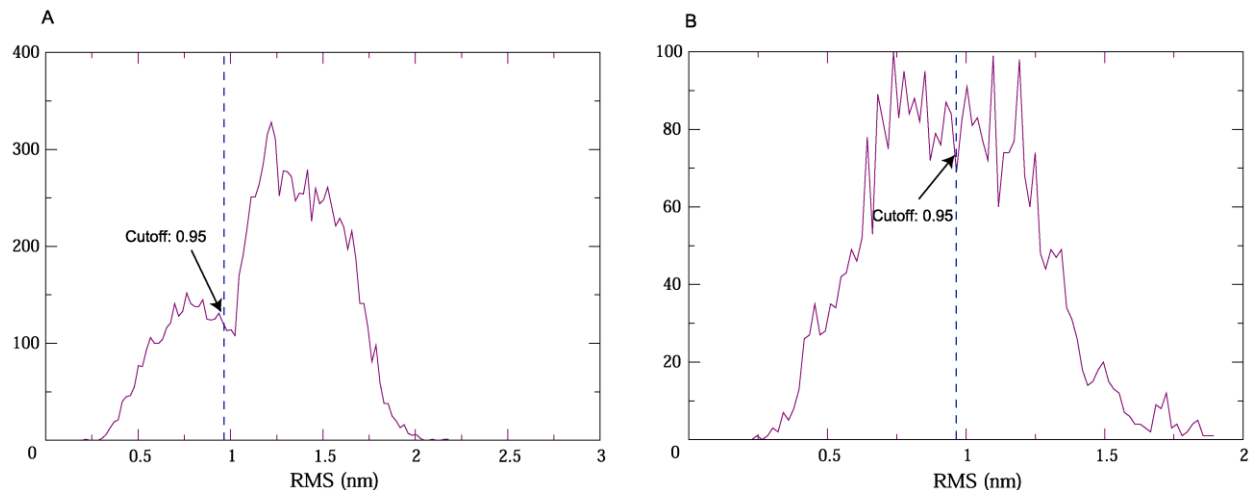

**Figure S7.** RMSD distribution of two subgroups, 160 ( $H_1H_2\_H_3H_4$ ) and 107 ( $H_1H_4\_H_2H_3$ ) structures respectively, for the 267 structures based on the helical arrangements in Junction I. The 3D models are obtained using a distance constraint between  $A_{180}$  and  $C_{232}G_{240}$ . With equally distributed 101 bins formed between zero and maximum RMSD values ((A) 2.36 and (B) 2.10 nm), each RMSD value from either upper or lower triangular RMSD matrix ((A)  $160 \times 160$  and (B)  $107 \times 107$ ) is put into a right bin. The cutoff values of 1.0 and 0.96 separate the two peaks in (A) and (B).

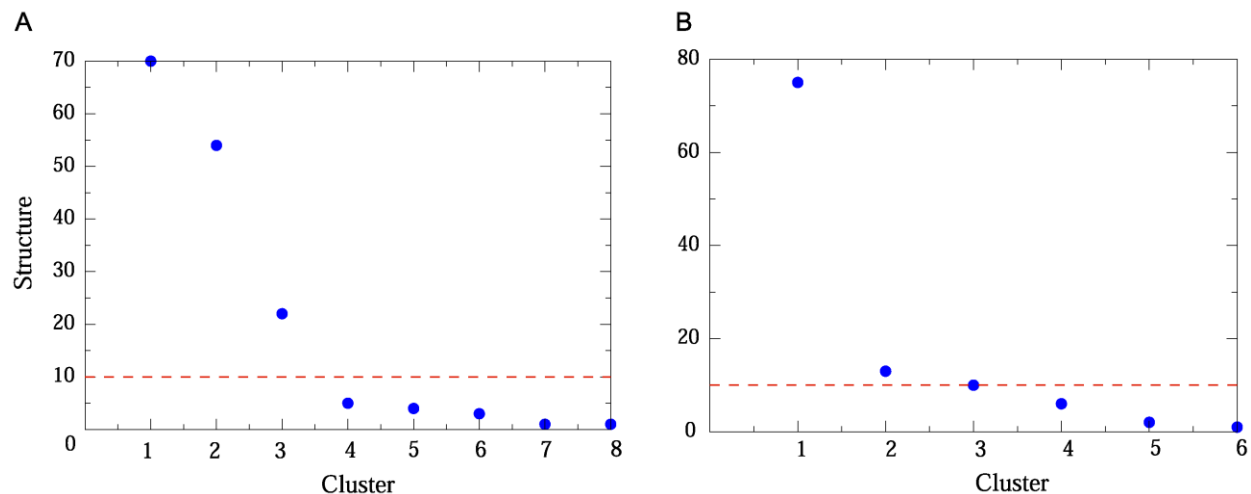

**Figure S8.** Clustering analysis of the two subgroups, of 160 ( $H_1H_2\_H_3H_4$ ) and 107 ( $H_1H_4\_H_2H_3$ ) structures respectively, in 267 structures based on the helical arrangements in Junction I. The 3D models are obtained using a distance constraint between  $A_{180}$  and  $C_{232}G_{240}$ . The RMSDs of structures in (A) and (B) range from 0.22 to 2.36 nm and from 0.25 to 2.10 nm, respectively. Eight and six clusters are found in (A) and (B), of which the first three clusters for both (A) and (B) contain at least 10 structures.

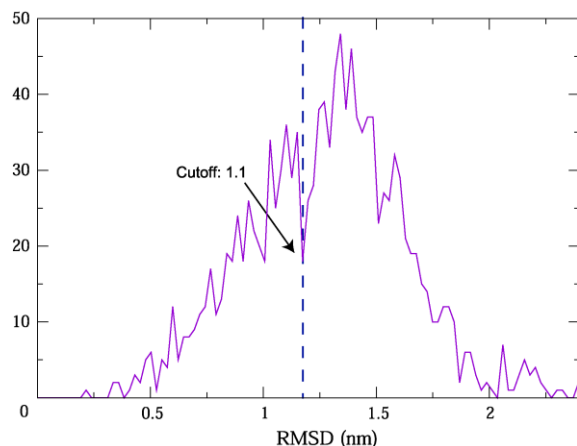

**Figure S9.** RMSD distribution of 52 structures, 49 ( $H_1H_2\_H_3H_4$ ) and 3 ( $H_1H_4\_H_2H_3$ ). The 3D models are obtained using a distance constraint between  $A_{180}$  and  $G_{229}C_{243}$ . With equally distributed 101 bins formed between zero and the maximum RMSD value of 2.39 nm, each RMSD value from either upper or lower triangular RMSD matrix ( $52 \times 52$ ) is put into a right bin. Although determining cutoff values is not clear cut due to the indefinite two peaks in the distribution and a relatively small number of structures, we find a reasonable cutoff value of 1.1 nm.

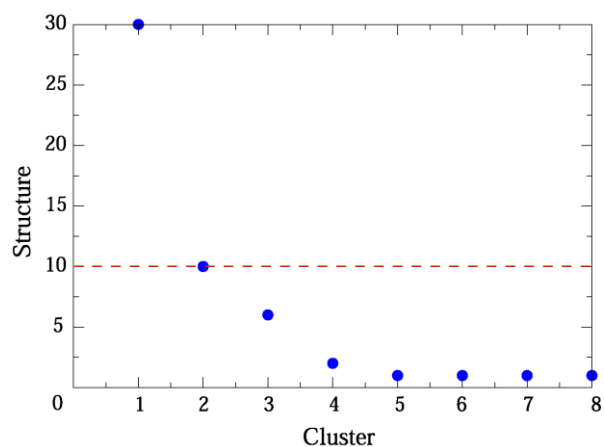

**Figure S10.** Clustering analysis for the 52 structures, mainly 49 for  $H_1H_2\_H_3H_4$  and 3 for  $H_1H_4\_H_2H_3$ . The 3D models are obtained using a distance constraint between  $A_{180}$  and  $G_{229}C_{243}$ . The RMSDs of structures range from 0.20 to 2.39 nm. The first two of eight clusters contain at least 10 structures.

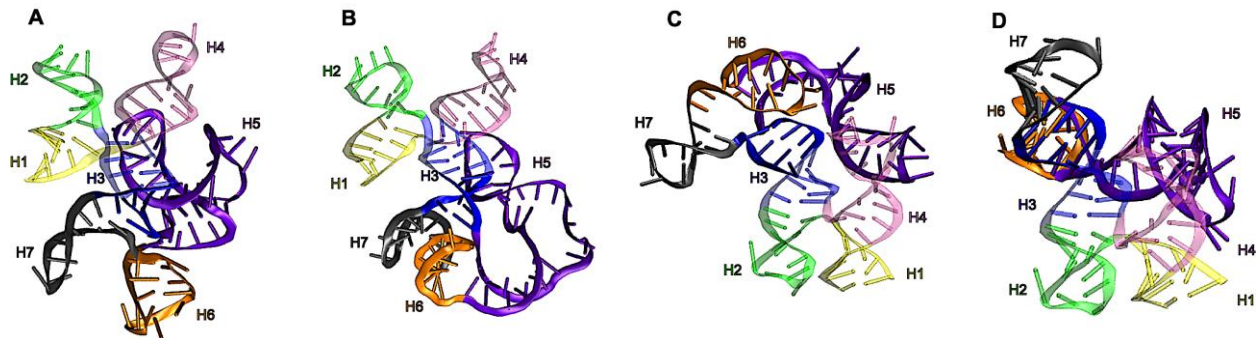

**Figure S11.** Candidate 3D models of FMDV IRES domain 3 targeting the G<sub>229</sub>/C<sub>243</sub> base pair as a receptor of GUAA tetraloop. The structures are unorganized in junction II comparing to the candidate models in Fig. 5. Note that (A) and (B) are from the two clusters in Fig. S4 while (C) and (D) are chosen among the three decoys for H<sub>1</sub>H<sub>4</sub>\_H<sub>2</sub>H<sub>3</sub>.

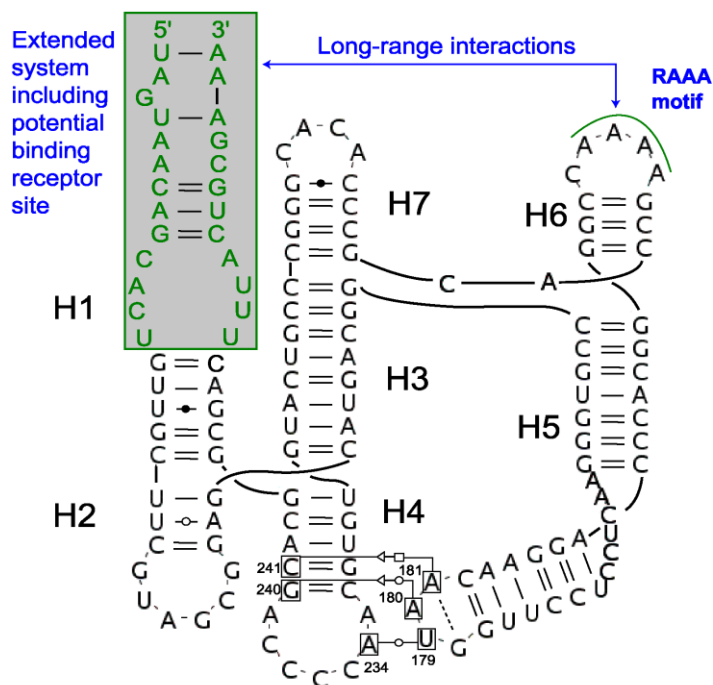

**Figure S12.** An extended 2D structure of the apical region including a potential binding receptor site of RAAA motif. Experimental data suggests long-range interactions between RAAA motif and the extended system (U<sub>121</sub>...A<sub>261</sub>). In 3D space, the plane of junction I and II are perpendicular that the spatial distance between these structural elements involving RAAA long-range interactions are relatively close.



■ 2D structure of loop B in poliovirus IRES domain IV

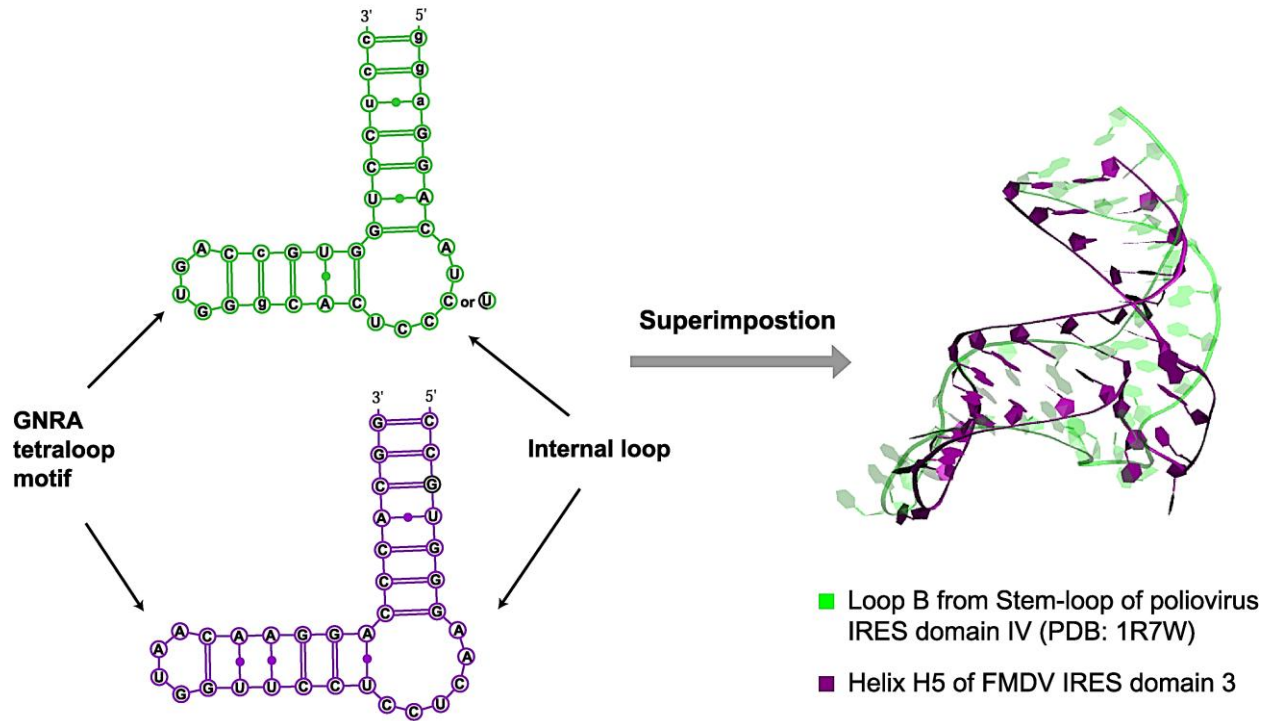

■ 2D structure of helix H5 in FMDV IRES domain 3

**Figure S13.** The shape of helix H5 agrees well with an L-shaped native structure of a poliovirus IRES domain IV. In addition, the helix H5 containing GNRA motif is compared to the NMR data of loop B, equivalent in poliovirus IRES containing GNRA motif. Although the sequences are different, overall shapes of both structures agree well with RMSD value of 7.5 Å.

**Table S1.** Sequences of GNRA loop in 318 FMDV IRES domain 3

| Sequence Count | GUAA<br>233 | GUGA<br>54 | GCAA<br>22 | GCGA<br>8 | GAGA<br>1 |
|----------------|-------------|------------|------------|-----------|-----------|
|----------------|-------------|------------|------------|-----------|-----------|

**Table S2.** List of FMDV IRES sequences.

| Seq. no. | Accession no. | Description (type, strain or isolate) | Seq. no. | Accession no. | Description (type, strain or isolate) |
|----------|---------------|---------------------------------------|----------|---------------|---------------------------------------|
| 1        | FJ824812      | C strain C-S8p200                     | 160      | AY304994      | Asia 1 IND 63/72                      |
| 2        | DQ409190      | C isolate C-S8p460d951                | 161      | AY593755      | A isolate a15thailand iso43           |
| 3        | AM409325      | C isolate H595                        | 162      | AJ633821      | O isolate FRA/1/2001                  |
| 4        | AY593805      | C isolate c1ober iso88                | 163      | AJ539141      | O strain UKG/35/2001                  |
| 5        | AY593804      | C isolate c1noville iso56             | 164      | AJ539137      | O strain TAW/2/99 BOV                 |
| 6        | AJ133358      | C isolate rp99                        | 165      | Y17973        | Asia isolate Asia 1 63/72             |
| 7        | AJ133359      | C isolate rp146                       | 166      | AB079061      | O strain O/JPN/2000                   |
| 8        | AY593808      | C4 isolate C4 Tierra del Fuego iso2   | 167      | DQ989321      | Asia 1 isolate IND 438-01             |
| 9        | AY593806      | C3 isolate c3ind iso19                | 168      | DQ989320      | Asia 1 isolate IND 182-02             |
| 10       | AY593757      | A isolate a17 Aguarulbos iso83        | 169      | DQ404160      | O strain UKG/14524/2001               |
| 11       | AY593803      | A isolate avenceslau iso70            | 170      | DQ404159      | O strain UKG/14603/2001               |
| 12       | AY593753      | A isolate a13brazil iso75             | 171      | DQ404158      | O strain UKG/15101/2001               |
| 13       | AY593787      | A isolate abage iso63                 | 172      | AY593793      | A isolate aphilippines iso50          |
| 14       | AY593758      | A isolate a18zulia iso40              | 173      | JN099702      | A isolate 4258 strain A/IRQ/09        |
| 15       | AY593788      | A isolate abrazil iso67               | 174      | JN099701      | A isolate 4257 strain A/IRQ/09        |
| 16       | AY593756      | A isolate a16belem iso80              | 175      | JN099690      | A isolate 4236 strain A/IRQ/09        |
| 17       | AY593781      | A isolate a5westerwald iso73          | 176      | FJ175666      | O isolate Israel 07-6387              |
| 18       | AY593778      | A isolate a4spain iso62               | 177      | FJ175662      | O isolate Israel 07-6380              |
| 19       | AY593754      | A isolate a14 spain iso39             | 178      | FJ175661      | O isolate Israel 07-6378              |
| 20       | AY593752      | A isolate a12valle 119 iso20          | 179      | EF494487      | A isolate PAK1                        |
| 21       | M32257        | A-12                                  | 180      | EF117837      | A isolate Lindholm 1.3 PAK3/2006      |
| 22       | AY593821      | O isolate o1caseros iso35             | 181      | HQ832581      | A isolate IND 64/2004                 |
| 23       | AY593792      | A isolate aparama iso55               | 182      | EF552697      | O/UKG/5681/2001                       |
| 24       | AY593780      | A isolate a5allier iso45              | 183      | EF552694      | O/UKG/4998/2001                       |
| 25       | AY593789      | A isolate acanefa iso48               | 184      | EF552692      | O/UKG/7299/2001                       |
| 26       | AY593769      | A isolate a25 argentina iso38         | 185      | DQ989316      | Asia 1 isolate IND 21-89              |
| 27       | AY593771      | A isolate a27columbia iso78           | 186      | DQ989313      | Asia 1 isolate IND 52-87              |
| 28       | AY593760      | A isolate a20ussr iso10               | 187      | DQ989309      | Asia 1 isolate IND 82-96              |
| 29       | AY593826      | O isolate o2brescia iso17             | 188      | DQ989308      | Asia 1 isolate IND 397-97             |
| 30       | AY593807      | C3 isolate c3resende iso1             | 189      | DQ404163      | O strain UKG/14339/2001               |
| 31       | M10975        | A12 strain 119                        | 190      | DQ404162      | O strain UKG/14476/2001               |
| 32       | AY593779      | A isolate a4wg iso72                  | 191      | DQ404161      | O strain UKG/14391/2001               |
| 33       | AY593777      | A isolate a4 W Germany iso42          | 192      | AY312587      | O strain PanAsia isolate O/SKR/2000   |
| 34       | AY593794      | A isolate asabana iso68               | 193      | AY593824      | O strain O1SKR isolate o1skr iso85    |
| 35       | AY593767      | A isolate a24 argentina iso9          | 194      | AJ539140      | O strain SAR/19/2000                  |
| 36       | D10146        | C3R-O/E                               | 195      | AJ539139      | O strain SKR/2000                     |
| 37       | AY593774      | A isolate a2spain iso7                | 196      | HQ832586      | A isolate IND 43/2006                 |
| 38       | AY593768      | A isolate a24cruzeiro iso71           | 197      | HQ832579      | A isolate IND 281/2003                |
| 39       | AY593796      | Asia 1 isolate asia1-2isrl3-63 iso6   | 198      | HM854024      | A strain IND17/82                     |
| 40       | AY593827      | O isolate o3venezuela iso15           | 199      | DQ989317      | Asia 1 isolate IND 148-01             |
| 41       | AY593822      | O isolate o1m11 iso57                 | 200      | DQ989314      | Asia 1 isolate IND 354-01             |
| 42       | HQ009509      | O strain China/5/99(Fujian)           | 201      | JN099703      | A isolate 4253                        |
| 43       | AY593810      | C isolate cwald iso32                 | 202      | JN099700      | A isolate 4256                        |
| 44       | AY593809      | C5 isolate c5arg iso60                | 203      | JN099699      | A isolate 4255                        |
| 45       | AY593775      | A isolate a32ven iso36                | 204      | JN099697      | A isolate 4252                        |
| 46       | AY593773      | A isolate a29peru iso37               | 205      | JN099694      | A isolate 4240                        |
| 47       | HQ832585      | A isolate IND 26/2006                 | 206      | JN099692      | A isolate 4238                        |
| 48       | DQ533483      | Asia 1 strain ZB/CHA/58(att)          | 207      | JN006722      | A isolate A/SIN/PAK/L4/2008           |
| 49       | AY593795      | Asia 1 isolate asia1-1pak iso3        | 208      | HQ632770      | O isolate MAY/1/2004                  |
| 50       | HQ832580      | A isolate IND 818/2003                | 209      | FJ593963      | A isolate IND83/97                    |
| 51       | AY593764      | A isolate a22iraq70 iso92             | 210      | EF494488      | A isolate PAK5/2006                   |
| 52       | AY593763      | A isolate a22iraq64 iso86             | 211      | EF494486      | A isolate AIRN2005_WRL                |
| 53       | AY593762      | A isolate a22iraq-95 iso95            | 212      | AY593797      | Asia 1 isolate asia1-3kimron iso61    |
| 54       | X74812        | A strain A22/550 Azerbaijan 65        | 213      | AY593766      | A isolate a23kenya iso8               |
| 55       | AY593829      | O isolate o6pirbright iso58           | 214      | HQ832582      | A isolate IND 249/2004                |
| 56       | AY593819      | O isolate o1Campos94 iso94            | 215      | FJ542367      | O isolate UKG/1558/2001               |
| 57       | AY593818      | O isolate o1Campos iso96              | 216      | AF377945      | O/SKR/2000                            |

|     |          |                                      |     |          |                                         |
|-----|----------|--------------------------------------|-----|----------|-----------------------------------------|
| 58  | AJ320488 | O isolate o1Campos/Bra/58            | 217 | DQ989319 | Asia 1 isolate IND 423-01               |
| 59  | M95781   | C isolate Campos (stock 507)         | 218 | AY593813 | O isolate o11indonesia iso52            |
| 60  | HM008917 | O strain O/YS/CHA/05                 | 219 | JN006721 | Asia 1 isolate<br>As/SIN/PAK/L2812/2009 |
| 61  | DQ989311 | Asia 1 isolate IND 37-02             | 220 | JN006720 | Asia 1 isolate<br>As/SIN/PAK/L2810/2009 |
| 62  | AY593751 | A isolate a10holland iso82           | 221 | HQ832584 | A isolate IND 22/2006                   |
| 63  | AJ007347 | Isolate C3Arg85                      | 222 | HQ832578 | A isolate IND 161/2003                  |
| 64  | FJ593975 | A isolate IND461/02                  | 223 | HM854021 | A strain IND81/00                       |
| 65  | FJ593964 | A isolate IND100/06                  | 224 | GQ406247 | A strain A/VN/09/2009                   |
| 66  | AY333431 | O isolate O/NY00                     | 225 | AY593812 | O isolate o10phil76 iso76               |
| 67  | AY593790 | A isolate a general lopez iso102     | 226 | AY593811 | O isolate o10phil54 iso54               |
| 68  | AY593765 | A isolate a22turkey iso66            | 227 | HQ832583 | A isolate IND 447/2005                  |
| 69  | M32258   | A-10                                 | 228 | HQ113232 | O isolate O/ISL/PAK/L1573/2009          |
| 70  | EU448373 | O isolate UKG/93/2007 (IP2b)         | 229 | AY312589 | O isolate O/SKR/2002                    |
| 71  | EU448372 | O isolate UKG/7B/2007 (IP1b)         | 230 | AY593772 | A isolate a28 Turkey iso44              |
| 72  | EU448371 | O isolate UKG/7/2007 (IP1b)          | 231 | Y17974   | O Bak/90                                |
| 73  | EU448370 | O isolate O1/BFS 1860/UK/67 (MAH)    | 232 | JF739177 | Asia 1 isolate As1/Shamir/89            |
| 74  | EU448369 | O isolate O1/BFS 1860/UK/67 (IAH2)   | 233 | HQ832592 | A isolate IND 17/2009                   |
| 75  | EU448368 | O isolate O1/BFS 1860/UK/67 (IAH1)   | 234 | DQ989323 | Asia 1 isolate IND 97-03                |
| 76  | AY593830 | O isolate o7poland iso49             | 235 | DQ989322 | Asia 1 isolate IND 139-02               |
| 77  | AY593820 | O isolate o1canefa iso59             | 236 | AY593800 | Asia 1 isolate asia1leb83 iso28         |
| 78  | AY593817 | O isolate o1brugge iso79             | 237 | AY593799 | Asia 1 isolate asia1leb4 iso4           |
| 79  | AY593816 | O isolate o1bfs46 iso46              | 238 | AY593798 | Asia 1 isolate asia1leb-89 iso89        |
| 80  | AY593815 | O isolate o1bfs iso18                | 239 | HM854025 | A strain IND40/00                       |
| 81  | AY593770 | A isolate a26arg iso74               | 240 | GQ406248 | A strain A/VN/02/2009                   |
| 82  | D10144   | Strain O1C-O/E                       | 241 | AY593828 | O isolate o5india iso34                 |
| 83  | HQ832576 | A isolate IND 21/1990                | 242 | JQ900581 | O strain O/GSLX/2010                    |
| 84  | AY593823 | O isolate o1manisa iso87             | 243 | JN998085 | O strain O/BY/CHA/2010                  |
| 85  | AY593814 | O isolate o1argentina iso5           | 244 | HQ632768 | O isolate MAY/3/2000                    |
| 86  | AY593786 | A isolate aarg Trenquelauquen iso103 | 245 | FJ593969 | A isolate IND241/04                     |
| 87  | AY593785 | A isolate aargp64 iso100             | 246 | DQ989315 | Asia 1 isolate IND 47-93                |
| 88  | AY593784 | A isolate aargp55 iso99              | 247 | DQ989318 | Asia 1 isolate IND 61-02                |
| 89  | AY593783 | A isolate aarg2001 iso93             | 248 | DQ989305 | Asia 1 isolate IND 116-90               |
| 90  | HQ832588 | A isolate IND 88/2006                | 249 | HQ632773 | A isolate MAY/3/2007                    |
| 91  | HQ113233 | Asia 1 isolate BAM/AFGL-590/2009     | 250 | GQ406252 | A strain A/VN/20/2009                   |
| 92  | FJ593970 | A isolate IND270/03                  | 251 | GQ406249 | A strain A/VN/03/2009                   |
| 93  | FJ593968 | A isolate IND154/03                  | 252 | HM229661 | O isolate HKN/20/2010                   |
| 94  | FJ593967 | A isolate IND153/03                  | 253 | HM625674 | O isolate O/K/52/1992                   |
| 95  | FJ593962 | A isolate IND24/03                   | 254 | GU125646 | Asia 1 isolate Asia1/VN/LC04/2005       |
| 96  | EU140964 | O strain UAE 7/99                    | 255 | FJ593965 | A isolate IND104/00                     |
| 97  | DQ989304 | Asia 1 isolate IND 334-00            | 256 | EF614457 | O strain O/SKR/14/02                    |
| 98  | DQ989303 | Asia 1 isolate IND 151-94            | 257 | DQ989312 | Asia 1 isolate IND 13-91                |
| 99  | DQ404164 | O strain UKG/11676/2001              | 258 | AY687334 | Asia 1 strain IND 491/97                |
| 100 | AY593837 | O isolate ouruguay-51 iso51          | 259 | FJ593974 | A isolate IND456/98                     |
| 101 | AY593836 | O isolate ouk2001x iso84             | 260 | FJ593972 | A isolate IND288/07                     |
| 102 | AY593832 | O isolate O UK2001-FB                | 261 | FJ461344 | O isolate Kumi District                 |
| 103 | AY593831 | O isolate O UK2001-ED                | 262 | HQ268509 | A isolate VIT_4/2004                    |
| 104 | AY593825 | O isolate o1valle iso64              | 263 | GQ406251 | A strain A/VN/16/2009                   |
| 105 | AY593776 | A isolate a3mecklenburg iso81        | 264 | AY593782 | A isolate a argentina 2000 iso104       |
| 106 | AY593759 | A isolate a1bayern iso41             | 265 | JQ973889 | O strain O/CHN/Mya98/33-P               |
| 107 | AJ539138 | O strain Tibet/CHA/99                | 266 | HQ632774 | Asia 1 isolate MAY/9/99                 |
| 108 | AJ539136 | O strain TAW/2/99 TC                 | 267 | AY593834 | O isolate orey-iran iso53               |
| 109 | AF506822 | O strain China/1/99(Tibet)           | 268 | HQ832590 | A isolate IND 245/2007                  |
| 110 | EU448381 | O isolate UKG/2366/2007 (IP8)        | 269 | GU931682 | Asia 1 isolate Asia1/YS/CHA/05          |
| 111 | EU448380 | O isolate UKG/1679/2007 (IP7)        | 270 | HM625676 | O isolate O/K/117/1999                  |
| 112 | EU448379 | O isolate UKG/1484/2007 (IP6b)       | 271 | FJ461345 | O isolate Kapchorwa District            |
| 113 | EU448377 | O isolate UKG/800/2007 (IP4b)        | 272 | DQ989307 | Asia 1 isolate IND 247-92               |
| 114 | EU448376 | O isolate UKG/1153/2007 (IP3c)       | 273 | AY359854 | O strain OMIII                          |
| 115 | EU448375 | O isolate UKG/643/2007 (IP3b)        | 274 | DQ119643 | O strain HLJOC12/03                     |
| 116 | EU448374 | O isolate UKG/150/2007 (IP2c)        | 275 | JN998086 | O strain O/GZ/CHA/2010                  |
| 117 | X00871   | Strain O1K                           | 276 | AY593835 | O isolate otaiwan97 iso106/112          |
| 118 | D10143   | strain O1C                           | 277 | AY593833 | O isolate openghu iso108                |
| 119 | HQ268524 | O isolate BHU_27/2004                | 278 | AF308157 | O1 Yunlin Taiwan                        |
| 120 | JN099698 | A isolate 4254 strain A/IRQ/09       | 279 | HM854023 | A strain IND258/99                      |
| 121 | JN099696 | A isolate 4247 strain A/IRQ/09       | 280 | FJ593966 | A isolate IND138/99                     |

|     |          |                                   |     |          |                                    |
|-----|----------|-----------------------------------|-----|----------|------------------------------------|
| 122 | JN099695 | A isolate 4244 strain A/IRQ/09    | 281 | EF614458 | Asia 1 strain Asia1/MOG/05         |
| 123 | JN099693 | A isolate 4239 strain A/IRQ/09    | 282 | EF149009 | Asia 1 strain Jiangsu/China/2005   |
| 124 | JN099691 | A isolate 4237 strain A/IRQ/09    | 283 | HQ832589 | A isolate IND 109/2006             |
| 125 | JN099689 | A isolate 4234 strain A/IRQ/09    | 284 | GQ406250 | A strain A/VN/11/2009              |
| 126 | JN099688 | A isolate 4235 strain A/IRQ/09    | 285 | FJ593973 | A isolate IND360/07                |
| 127 | JN006719 | Asia 1 isolate As/SIN/PAK/L5/2008 | 286 | HM854022 | A strain IND17/77                  |
| 128 | FJ175665 | O isolate Israel 07-6391          | 287 | HM055510 | O isolate O/VN/LC169/2009          |
| 129 | FJ175664 | O isolate Israel 07-6389          | 288 | AF154271 | Strain Tau-YuanTW97 isolate Taiwan |
| 130 | FJ175663 | O isolate Israel 07-6382          | 289 | HQ631363 | Asia 1 isolate Asia1/1/YZ/CHA/06   |
| 131 | FN594747 | Strain O1 Manisa                  | 290 | AF026168 | O strain Chu-Pei complete genome   |
| 132 | FJ593971 | A isolate IND287/96               | 291 | HM625675 | O isolate O/K/109/2000             |
| 133 | DQ989310 | Asia 1 isolate IND 101-99         | 292 | AY317098 | Strain HKN/2002                    |
| 134 | AY390432 | Asia1 strain YNBS/58              | 293 | HQ832591 | A isolate IND 437/2008             |
| 135 | AY593802 | A isolate A uruguay 2001 iso98    | 294 | FJ906802 | Asia 1 strain Asia1/WHN/CHA/06     |
| 136 | AY593801 | A isolate A30 Uruguay/68 iso90    | 295 | GU125649 | O isolate O/VN/SL21/2006           |
| 137 | AY687333 | Asia 1 isolate IND 321/01         | 296 | GU125648 | O isolate O/VN/SL01/2006           |
| 138 | HQ632769 | O isolate MAY/7/2001              | 297 | GU125647 | O isolate O/VN/SL22/2006           |
| 139 | GU384683 | O isolate PAK/45/2008             | 298 | HQ832587 | A isolate IND 50/2006              |
| 140 | GU384682 | O isolate PAK/44/2008             | 299 | HM625677 | O isolate O/U/25/2006              |
| 141 | EU214601 | O strain UKG/8098/2001            | 300 | HQ832577 | A isolate IND 110/1999             |
| 142 | EF552696 | O/UKG/5470/2001                   | 301 | HM191257 | O isolate O/U/312/2006             |
| 143 | EF552695 | O/UKG/9443/2001                   | 302 | AY593791 | A isolate airan iso105             |
| 144 | EF552693 | O/UKG/4014/2001                   | 303 | GU125645 | Asia 1 isolate Asia1/VN/QT03/2007  |
| 145 | EF552691 | O/UKG/9161/2001                   | 304 | HM625673 | O isolate O/K/48/2005              |
| 146 | EF552690 | O/UKG/7039/2001                   | 305 | HQ412603 | O strain O/YM/YN/2000              |
| 147 | EF552689 | O/UKG/4141/2001                   | 306 | EF149010 | Asia 1 strain Asia 1/HNK/CHA/05    |
| 148 | EF552688 | O/UKG/3952/2001                   | 307 | EF175732 | O isolate WFL                      |
| 149 | DQ989306 | Asia 1 isolate IND 81-86          | 308 | EF611987 | O isolate O/Uganda/2006            |
| 150 | DQ404175 | O strain UKG/173/2001             | 309 | HQ632772 | O isolate MAY/7/2007               |
| 151 | DQ404173 | O strain UKG/220/2001             | 310 | HQ632771 | O isolate MAY/8/2005               |
| 152 | DQ404172 | O strain UKG/621/2001             | 311 | AY686687 | O isolate ES/2001                  |
| 153 | DQ404171 | O strain UKG/4569/2001            | 312 | DQ248888 | O isolate lz                       |
| 154 | DQ404169 | O strain UKG/7038/2001            | 313 | AY593761 | A isolate a21kenya iso77           |
| 155 | DQ404170 | O strain UKG/7675/2001            | 314 | AF511039 | O strain Akesu/58                  |
| 156 | DQ404168 | O strain UKG/9011/2001            | 315 | DQ478936 | O strain OGBF15                    |
| 157 | DQ404167 | O strain UKG/9327/2001            | 316 | DQ478937 | O strain OGBF15 derivative         |
| 158 | DQ404166 | O strain UKG/9788/2001            | 317 | AY593844 | SAT 1 isolate sat1-7isrl iso12     |
| 159 | DQ404165 | O strain UKG/9964/2001            | 318 | FJ461346 | SAT 2                              |

**Table S3.** Alignment of 318 FMDV IRES sequences. Sequence number (Seq. no.) is shown in the first column followed by aligned sequences. The apical region of domain 3 is marked in a shaded background.

| Seq. no. | Aligned sequences                                              |
|----------|----------------------------------------------------------------|
| 310      | AGCAGGTTTCCGCAACT-GATAAAAAC-CCGTGCAATTTTGGAAACCCCGCCTGGTCTTTCC |
| 311      | AGCAAGTTTCCACAACCT-GA-GAAAAC-TCGTGCAACTTGGAAACCCCGCCTGGTCTTTCC |
| 307      | AGCAGGTTTCCACAACCT-GATA-AAAC-TCGTGCAATTTTGAAGCCCGCCTGGTCTTTCC  |
| 308      | -GCAGGTATCCACAACCT-GACACAAAA-CCGTGCAATTTGAAGCTCCGCCTGGTCTTTCC  |
| 306      | --CAGGTTCCACAACC-GACACAAA--CCGTGCAACTTGAAACTCCGCCTGGTCTTTCC    |
| 276      | AGCAGGTTTCCACAACCT-GATAAAAAC--TCGTGCAACTTGAAACTCCGCCTGGTCTTTCC |
| 277      | AGCAGGTTTCCACAACCT-GATAAAAAC--TCGTGCAACTTGAAACTCCGCCTGGTCTTTCC |
| 278      | AGCAGGTTTCCACAACCT-GATAAAAAC--TCGTGCAACTTGAAACTCCGCCTGGTCTTTCC |
| 288      | AGCAGGTTTCCACAACCT-GATAAAAAC--TCGTGCAACTTGAAACCCCGCCTGGTCTTTCC |
| 305      | AGCAGGTTTCCACAACCT-GATAAAAAC--CCGTGCAATTTTGAACCCCGCCTGGTCTTTCC |
| 290      | AGCAGGTTTCCACAACCT-GATAAAAAC--TCGTGCAACTTGAAACCCCGCCTGGTCTTTCC |
| 292      | AGCAGGTTTCCACAACCT-GATAAAAAC--TCGTGCAATTTTGAACCCCGCCTGGTCTTTCC |
| 244      | --CAGGTTCCACAACC-GACACA-AA-CCGTGCAACTTGAAACTCCGCCTGGTCTTTCC    |
| 257      | AGCAGGTTCCACAACCT-GACACA-AA-CCGTGCAACTTGAAACTCCGCCTGGTCTTTCC   |
| 299      | -GCAGGTATCCACAACCT-GACACAGAA-CCGTGCAATTTGAAGCTCCGCCTGGTCTTTCC  |
| 245      | -GCAGGTCTCCACAACCT-GATACAAA--TCGTGCAACTTGAAACCCCGCCTGGTCTTTCC  |
| 258      | ---AGGTTTCCACAACCT-GACACAAA--CCGTGCAATTTTGAAGCTCCGCCTGGTCTTTCC |
| 236      | -GCAGGTCTCCACAACCT-GACACAAA--CCGTGCAACTTGAAACTCCGCCTGGTCTTTCC  |
| 246      | -GCAGGTTTCCACAACCT-GACACACA--ACGTGCAATTTGAAGCTCCGCCTGGTCTTTCC  |
| 259      | -GCAGGTTTCCACAACCT-GACACACA--TCGTGCAATTTGAAGCTCCGCCTGGTCTTTCC  |

268 -GCAGGTTTCCACAAC-T-GACACAAA--CCGTGCAATTTGAAACTCCGCCTGGTCTTTCC  
280 -GCAGGTTTCCACAAC-T-GACACACA--TCGTGCAATTTGAAAGCTCCGCCTGGTCTTTCC  
247 -GCAGGTTTCCACAAC-T-GACACAGA--TCGTGCAACTTGAAACTCCGCCTGGTCTTTCC  
220 -GCAGGTTTCCACAAC-T-GACACACA--TCGTGCAATTTGAAACCCCGCTGGTCTTTCC  
222 -GCAGGTTTCCACAAC-T-GACACAGA--TCGTGCAACTTGAAACTCCGCCTGGTCTTTCC  
238 -GCAGGTTTCCACAAC-T-GACACAAA--CCGTGCAACTTGAAACTCCGCCTGGTCTTTCC  
248 -GCAGGTTTCCACAAC-T-GACACGAA--CCGTGCAATTTGAAAGCTCCGCCTGGTCTTTCC  
261 -GCAGGTATCCACAAC-T-GACACAAA--CCGTGCAATTTGAAAGCTCCGCCTGGTCTTTCC  
249 -GCAGGTTTCCACAAC-T-GACACAAA--ACGTGCAACTTGAAACCCCGCTGGTCTTTCC  
293 -GCAGGTTTCCACAAC-T-GACACAAA--CCGTGCAATTTGAAACTCCGCCTGGTCTTTCC  
294 -GCAGGTTTCC--CAACC-GACACAAC--CCGTGCAACTTGAAACTCCGCCTGGTCTTTCC  
295 -GCAGGTTTCCACAAC-T-GACACAAA--CCGTGCAATTTGAAATCCCGCTGGTCTTTCC  
296 -GCAGGTTTCCACAAC-T-GACACAAA--CCGTGCAATTTGAAATCCCGCTGGTCTTTCC  
260 -GCAGGTTTCCACAAC-T-GACACAAA--CCGTGCAATTTGAAACTCCGCCTGGTCTTTCC  
61 AGCAGGTTTCCACAAC-T-GACACAAA--CCGTGCAACTTGAAACTCCGCCTAGTTTTTCC  
132 -GCAGGTTTCCACAAC-T-GACACACA--CCGTGCAACTTGAAACTCCGCCTGGTCTTTCC  
125 -GCAGGTTTCCACAAC-T-GACACAAA--CCGTGCAACTTGAAAGCTCCGCCTGGTCTTTCC  
126 -GCAGGTTTCCACAAC-T-GACACAAA--CCGTGCAACTTGAAAGCTCCGCCTGGTCTTTCC  
173 -GCAGGTTTCCACAAC-T-GACACAAA--CCGTGCAACTTGAAAGCTCCGCCTGGTCTTTCC  
204 -GCAGGTTTCCACAAC-T-GACACAAA--CCGTGCAACTTGAAAGCTCCGCCTGGTCTTTCC  
174 -GCAGGTTTCCACAAC-T-GACACAAA--CCGTGCAACTTGAAAGCTCCGCCTGGTCTTTCC  
175 -GCAGGTTTCCACAAC-T-GACACAAA--CCGTGCAACTTGAAAGCTCCGCCTGGTCTTTCC  
205 -GCAGGTTTCCACAAC-T-GACACAAA--CCGTGCAACTTGAAAGCTCCGCCTGGTCTTTCC  
127 -GCAGGTTTCCACAAC-T-GACACACACACCGTGAATCTGAAACTCCGCCTGGTCTTTCC  
218 --CAGGTTTCTCCTCAACT-T-GACACAAA--CCGTGCAATCTGCAGCTCCGCCTGGTCTTTCC  
217 -GCAGGTTTCCACAAC-T-GACACACA--ACGTGCAACTTGAAACTCCGCCTGGTCTTTCC  
133 -GCAGGTTTCCACAAC-T-GACACACA--CCGTGCAACTTGAAACTCCGCCTGGTCTTTCC  
225 -GCAGGTTTCCACAAC-T-GACACAAA--CCGTGCAATTTGAAACTCCGCCTGGTCTTTCC  
228 -GCAGGTTTCCACAAC-T-GACACACA--CCGTGCAACTTGAAACCCCGCTGGTCTTTCC  
255 -GCAGGTTTCCACAAC-T-GACACACA--CCGTGCAATTTGAAACTCCGCCTGGTCTTTCC  
266 -GCAGGTTTCCACAAC-T-GACACAAA--CCGTGCAATTTGAAACTCCGCCTGGTCTTTCC  
1 AGCAGGTTTCCCCTCAACT-T-GACACAAA--ACGTGCAACTTGAAACTCCGCCTGGTCTTTCC  
2 AGCAGGTTTCCCCTCAACT-T-GACACAAA--ACGTGCAACTTGAAACTCCGCCTGGTCTTTCC  
3 AGCAGGTTTCCCCTCAACT-T-GACACAAA--ACGTGCAACTTGAAACTCCGCCTGGTCTTTCC  
4 AGCAGGTTTCCCCTCAACT-T-GACACAAA--CCGTGCAACTTGAAACTCCGCCTGGTCTTTCC  
5 AGCAGGTTTCCCCTCAACT-T-GACACAAA--CCGTGCAACTTGAAACTCCGCCTGGTCTTTCC  
7 AGCAGGTTTCTCCTCAACT-T-GACACAAA--ACGTGCAACTTGAAACTCCGCCTGGTCTTTCC  
9 -GCAGGTTTCCCCTCAACT-T-GACACAAC--CCGTGCAACTTGAAACTCCGCCTGGTCTTTCC  
6 AGCAGGTTTCTCCTCAACT-T-GACACAAA--ACGTGCAACTTGAAACTCCGCCTGGTCTTTCC  
8 -GCAGGTTTCCCCTCAACT-T-GACACACA--CCGTGCAACTTGAAACTCCGCCTGGTCTTTCC  
10 AGCAGGTTTCCCCTCAACT-T-GACACAAA--CCGTGCAACTTGAAACTCCGCCTGGTCTTTCC  
12 AGCAGGTTTCCCCTCAACT-T-GACACAAA--CCGTGCAACTTGAAACTCCGCCTGGTCTTTCC  
11 -GCAGGTTTCCCCTCAACT-T-GACACAAA--CCGTGCAACTTGAAACTCCGCCTGGTCTTTCC  
13 -GCAGGTTTCCCCTCAACT-T-GACACAAA--CCGTGCAACTTGAAACTCCGCCTGGTCTTTCC  
22 AGCAGGTTTCCCCTCAACT-T-GACACAAA--CCGTGCAACTTGAAACTCCGCCTGGTCTTTCC  
23 AGCAGGTTTCCCCTCAACT-T-GACACAAA--CCGTGCAACTTGAAACTCCGCCTGGTCTTTCC  
18 AGCAGGTTTCTCCTCAACT-T-GACACAAA--CCGTGCAACTTGAAACTCCGCCTGGTCTTTCC  
19 AGCAGGTTTCTCCTCAACT-T-GACACAAA--CCGTGCAACTTGAAACTCCGCCTGGTCTTTCC  
14 AGCAGGTTTCCCCTCAACT-T-GACACAAA--CCGTGCAACTTGAAACTCCGCCTGGTCTTTCC  
30 AGCAGGTTTCCCCTCAACT-T-GACACAAA--CCGTGCAACTTGAAACTCCGCCTGGTCTTTCC  
24 AGCAGGTTTCCCCTCAACT-T-GACACAAA--CCGTGCAACTTGAAACTCCGCCTGGTCTTTCC  
35 --CAGGCTCCCCTCAACT-T-GACACAAA--CCGTGCAACTTGAAACTCCGCCTGGTCTTTCC  
31 AGCAGGCTCCCCTCAACT-T-GACACAAA--CCGTGCAATTTGAAACTCCGCCTGGTCTTTCC  
36 AGCAGGTTTCCCCTCAACT-T-GACACAAA--CCGTGCAACTTGAAACTCCGCCTGGTCTTTCC  
15 -GCAGGTTTCCCCTCAACT-T-GACACAAA--CCGTGCAACTTGAAACTCCGCCTGGTCTTTCC  
21 AGCAGGTTTCCCCTCAACT-T-GACACAAA--CCGTGCAATTTGAAACTCCGCCTGGTCTTTCC  
20 AGCAGGTTTCCCCTCAACT-T-GACACAAA--CCGTGCAATTTGAAACTCCGCCTGGTCTTTCC  
27 AGCAGGTTTCTCCTCAACT-T-GACACAAA--CCGTGCAATTTGAAACTCCGCCTGGTCTTTCC  
16 -GCAGGTTTCCCCTCAACT-T-GACACAAA--CCGTGCAACTTGAAAGCTCCGCCTGGTCTTTCC  
17 AGCAGGTTTCCCCTCAACT-T-GACACAAA--CCGTGCAACTTGAAACTCCGCCTGGTCTTTCC  
79 -GCAGGTTTCCCCTCAACT-T-GACACAAA--CCGTGCAACTTGAAACTCCGCCTGGTCTTTCC  
32 -GCAGGTTTCCC--AACT-T-GACTACTAA--CCGTGCAACTTGAAATCCGCCTGGTCTTTCC

33 -GCAGGTTTCCC-AACT-GACACTAA--CCGTGCAACTTGAAATCCCGCCTGGTCTTTCC  
37 -GCAGGTTTCCC-AACT-GACACTAA--CCGTGCAACTTGAAATCCCGCCTGGTCTTTCC  
25 AGCAGGTCCCCCAACT-GACACAAA--TCGTGCAACTTGAAACTCCGCCTGGTCTTTCC  
26 AGCAGGTCCCCCAACT-GACACAAA--TCGTGCAACTTGAAACTCCGCCTGGTCTTTCC  
38 AGCAGGTTTCCCCAACT-GACACAAA--CCGTGCAACTTGAAACTCCGCCTGGGCTTTCC  
28 AGCAGACTTCCCCAACT-GACACAAA--CCGTGCAACTTGAAACCCCGCCTGGTCTTTCC  
34 -GCAGGTTTCCCCAACT-GACACACA--CCGTGCAAAATGAAACTCCGCCTGGTCTTTCC  
29 -GCAGGTTTCCCCAACT-GACACTAA--CCGTGCAACTTGAAATCCCGCCTGGTCTTTCC  
39 -GCAGGTTTCCCCAACT-GACACAAA--ACGTGCAACTTGAAACCCCGCCTGGTCTTTCC  
40 -GCAGGTTTCCCCAACT-GACACTAA--CCGTGCAACTTGAAATCCCGCCTGGTCTTTCC  
58 -GCAGGTTTCCCCAACT-GACACAAA--CCGTGCAACTTGAAACTCCGCCTGGTCTTTCC  
59 -GCAGGTTTCCCCAACT-GACACAAA--CCGTGCAACTTGAAACTCCGCCTGGTCTTTCC  
81 AGCAGGTTTCCCAACT-GACATAAA--CCGTGCAACTTGAAAGCTCCGCCTGGTCTTTCC  
82 -GCAGGTTTCCCCAACT-GACACAAA--CCGTGCAACTTGAAACTCCGCCTGGTCTTTCC  
83 -GCAGGTCTCCCAACT-GACACAAA--CCGTGCAACTTGAAACTCCGCCCGTCTTTCC  
84 -GCAGGTTTCCCAACT-GACACAAA--CCGTGCAACTTGAAACCCCGCCTGGTCTTTCC  
130 -GCAGGTTTCCCAACT-GACACACA--TCGTGCAACTTGAAACCCCGCCTGGTCTTTCC  
131 -GCAGGTTTCCCAACT-GACACAAA--CCGTGCAACTTGAAACCCCGCCTGGTCTTTCC  
51 -GCAGGTTTCCCAACT-GACACGAA--CCGTGCAACTTGAAACTCCGCCTGGTCTTTCC  
52 -GCAGGTTTCCCAACT-GACACGAA--CCGTGCAACTTGAAACTCCGCCTGGTCTTTCC  
53 -GCAGGTTTCCCAACT-GACACGAA--CCGTGCAACTTGAAACTCCGCCTGGTCTTTCC  
67 -GCAGGTTTCCCCAACC-GACACAAA--CCGTGCAACTTGAAAGTCCGCCTGGTCTTTCC  
66 --CAGGTTCCCAACC-GACACAAA--CCGTGCAACTTGAAACTCCGCCTGGTCTTTCC  
107 --CAGGTTCCCAACC-GACACAAA--CCGTGCAACTTGAAACTCCGCCTGGTCTTTCC  
105 -GCAGGTTTCCC-AACT-GACACTAA--CCGTGCAACTTGAAATCCCGCCTGGTCTTTCC  
106 -GCAGGTTCCCCAACT-GACACCAA--CCGTGCAACTTGAAATCCCGCCTGGTCTTTCC  
65 -GCAGGTTCCCCAACT-GACACACA--ACGTGCAACTTGAAACCTCCGCCTGGTCTTTCC  
41 -GCAGGTTCCCCAACT-GACACTAA--CCGTGCAACTTGAAATCCCGCCTGGTCTTTCC  
43 AGCAGGTTCCCCCAACT-GACACAAA--CCGTGCAACTTGAAACCCCGCCTGGTCTTTCC  
98 -GCAGGTAGCCCCAACT-GACACAAA--CCGTGCAACTTGAAACCCCGCCTGGTCTTTCC  
44 AGCAGGTTTCCCCAACT-GACACAAA--CCGTGCAACTTGAAACTCCGCCTGGTCTTTCC  
108 --CAGGTTCCCAACC-GACACAAA--CCGTGCAACTTGAAACTCCGCCTGGTCTTTCC  
109 --CAGGTTCCCAACC-GACACAAA--CCGTGCAACTTGAAACTCCGCCTGGTCTTTCC  
68 -GCAGGTTCCCAACT-GACACGAA--CCGTGCAACTTGAAACTCCGCCTGGTCTTTCC  
54 -GCAGGTTTCCCAACT-GACACGAA--CCGTGCAACTTGAAACTCCGCCTGGTCTTTCC  
56 -GCAGGTTTCCCCAACT-GACACAAA--CCGTGCAACTTGAAACTCCGCCTGGTCTTTCC  
74 -GCAGGTTTCCCCAACT-GACACAAA--CCGTGCAACTTGAAACTCCGCCTGGTCTTTCC  
55 --CAGGTTTCCCCAACT-GACATACA--CCGTGCAACTTGAAACTCCGCCTGGTCTTTCC  
57 -GCAGGTTTCCCCAACT-GACACAAA--CCGTGCAACTTGAAACTCCGCCTGGTCTTTCC  
80 -GCAGGTTTCCCCAACT-GACACAAA--CCGTGCAACTTGAAACTCCGCCTGGTCTTTCC  
72 -GCAGGTTTCCCCAACT-GACACAAA--CCGTGCAACTTGAAACTCCGCCTGGTCTTTCC  
110 -GCAGGTTTCCCCAACT-GACACAAA--CCGTGCAACTTGAAACTCCGCCTGGTCTTTCC  
73 -GCAGGTTTCCCCAACT-GACACAAA--CCGTGCAACTTGAAACTCCGCCTGGTCTTTCC  
69 -GCAGGTTTCCCCAACT-GACACTTA--CCGTGCAACTTGAAATCCCGCCTGGTCTTTCC  
70 -GCAGGTTTCCCCAACT-GACACAAA--CCGTGCAACTTGAAACTCCGCCTGGTCTTTCC  
71 -GCAGGTTTCCCCAACT-GACACAAA--CCGTGCAACTTGAAACTCCGCCTGGTCTTTCC  
111 -GCAGGTTTCCCCAACT-GACACAAA--CCGTGCAACTTGAAACTCCGCCTGGTCTTTCC  
112 -GCAGGTTTCCCCAACT-GACACAAA--CCGTGCAACTTGAAACTCCGCCTGGTCTTTCC  
113 -GCAGGTTTCCCCAACT-GACACAAA--CCGTGCAACTTGAAACTCCGCCTGGTCTTTCC  
76 -GCAGGTTTCCCCAACT-GACACAAA--CCGTGCAACTTGAAACTCCGCCTGGTCTTTCC  
77 -GCAGGTTTCCCCAACT-GACACAAA--CCGTGCAACTTGAAACTCCGCCTGGTCTTTCC  
75 -GCAGGTTTCCCCAACT-GACACAAA--CCGTGCAACTTGAAACTCCGCCTGGTCTTTCC  
114 -GCAGGTTTCCCCAACT-GACACAAA--CCGTGCAACTTGAAACTCCGCCTGGTCTTTCC  
78 -GCAGGTTTCCCCAACT-GACACAAA--CCGTGCAACTTGAAACTCCGCCTGGTCTTTCC  
115 -GCAGGTTTCCCCAACT-GACACAAA--CCGTGCAACTTGAAACTCCGCCTGGTCTTTCC  
116 -GCAGGTTTCCCCAACT-GACACAAA--CCGTGCAACTTGAAACTCCGCCTGGTCTTTCC  
60 --CAGGTTTCCCAACC-GACACAAA--CCGTGCAACTTGAAACTCCGCCTGGTCTTTCT  
216 --CAGGTTCCCAACC-GACACAAA--CCGTGCAACTTGAAACTCCGCCTGGTCTTTCC  
166 --CAGGTTCCCAACC-GACACAAA--CCGTGCAACTTGAAACTCCGCCTGGTCTTTCC  
215 --CAGGTTCCCAACC-GACACAAA--CCGTGCAACTTGAAACTCCGCCTGGTCTTTCC  
103 --CAGGTTCCCAACC-GACACAAA--CCGTGCAACTTGAAACTCCGCCTGGTCTTTCC  
42 --CAGGTTCCCAACC-GACACAAA--CCGTGCAACTTGAAACTCCGCCTGGTCTTTCC

46 -GCAGGTTTCCCAACT-GACACAAA--CCGTGCAACTTGAAACCCCGCTGGTCTTTCC  
47 -GCAGGTTTCCACAAC-TGACACACA--TCGTGCAACTTGAAACTCCGCCTGGTCTTTCC  
45 -GCAGGTTTCCCAACT-GACACAAA--CCGTGCAACTTGAAACCCCGCTGGTCTTTCC  
62 -GCAGGTTTCCCAACT-GACTACTTA--CCGTGCAACTTGAAATCCCGCTGGTCTTTCC  
86 -GCAGGTTTCCCAACC-GACACAAA--CCGTGCAACTTGAAAGTTCCGCCTGGTCTTTCC  
88 -GCAGGTTTCCCAACC-GACACAAA--CCGTGCAACTTGAAAGTTCCGCCTGGTCTTTCC  
87 -GCAGGTTTCCCAACC-GACACAAA--CCGTGCAACTTGAAAGTTCCGCCTGGTCTTTCC  
135 -GCAGGTTTCCCAACC-GACACAAA--CCGTGCAACTTGAAAGTTCCGCCTGGTCTTTCC  
85 -GCAGGTTTCCCAACT-GACACAAA--CCGTGCAACTTGAAACTCCGCCTGGTCTTTCC  
134 -GCAGGTTTCCACAAC-TGACACAAA--TCGTGCAACTTGAAACTCCGCCTGGTCTTTCC  
117 -GCAGGTTTCCCAACT-GACACAAA--CCGTGCAACTTGAAACTCCGCCTGGTCTTTCC  
118 -GCAGGTTTCCCAACT-GACACAAA--CCGTGCAACTTGAAACTCCGCCTGGTCTTTCC  
199 -GCAGGTTTCCACAAC-TGACACACA--ACGTGCAACTTGAAACTCCGCCTGGTCTTTCC  
200 -GCAGGTTTCCACAAC-TGACACACA--ACGTGCAACTTGAAACTCCGCCTGGTCTTTCC  
119 -GCAGGTTTCCACAAC-TGACACACA--TCGTGCAACTTGAAACCCCGCTGGTCTTTCC  
198 -GCAGGTTTCCACAAC-TGACACACA--TCGTGCAACTTGAAAGCTCCGCCTGGTCTTTCC  
207 -GCAGGTTTCCACAAC-TGATACACA--TCGTGCAACTTGAAACCCCGCTGGTCTTTCC  
219 -GCAGGTTTCCACAAC-TGACACACA--TCGTGCAACTTGAAACCCCGCTGGTCTTTCC  
206 -GCAGGTTTCCACAAC-TGACACAAA--CCGTGCAACTTGAAAGCTCCGCCTGGTCTTTCC  
121 -GCAGGTTTCCACAAC-TGACACAAA--CCGTGCAACTTGAAAGCTCCGCCTGGTCTTTCC  
201 -GCAGGTTTCCACAAC-TGACACAAA--CCGTGCAACTTGAAAGCTCCGCCTGGTCTTTCC  
122 -GCAGGTTTCCACAAC-TGACACAAA--CCGTGCAACTTGAAAGCTCCGCCTGGTCTTTCC  
120 -GCAGGTTTCCACAAC-TGACACAAA--CCGTGCAACTTGAAAGCTCCGCCTGGTCTTTCC  
202 -GCAGGTTTCCACAAC-TGACACAAA--CCGTGCAACTTGAAAGCTCCGCCTGGTCTTTCC  
203 -GCAGGTTTCCACAAC-TGACACAAA--CCGTGCAACTTGAAAGCTCCGCCTGGTCTTTCC  
171 --CAGGTTCCCAACC-GACACAAA--CCGTGCAACTTGAAACTCCGCCTGGTCTTTCC  
172 AGCAGGTTTCCCAACT-GACACAAA--CCGTGCAACTTGAAACTCCGCCTGGTCTTTCC  
123 -GCAGGTTTCCACAAC-TGACACAAA--CCGTGCAACTTGAAAGCTCCGCCTGGTCTTTCC  
124 -GCAGGTTTCCACAAC-TGACACAAA--CCGTGCAACTTGAAAGCTCCGCCTGGTCTTTCC  
128 -GCAGGTTTCCACAAC-TGACACACA--TCGTGCAACTTGAAACCCCGCTGGTCTTTCC  
129 -GCAGGTTTCCACAAC-TGACACACA--TCGTGCAACTTGAAACCCCGCTGGTCTTTCC  
177 -GCAGGTTTCCACAAC-TGACACACA--TCGTGCAACTTGAAACCCCGCTGGTCTTTCC  
209 -GCAGGTTTCCACAAC-TGACACACA--CCGTGCAACTTGAAAGCTCCGCCTGGTCTTTCC  
178 -GCAGGTTTCCACAAC-TGACACACA--TCGTGCAACTTGAAACCCCGCTGGTCTTTCC  
208 -GCAGGTTTCCACAAC-TGACACACA--TCGTGCAACTTGAAACCCCGCTGGTCTTTCC  
136 -GCAGGTTTCCCAACC-GACACAAA--CCGTGCAACTTGAAAGTTCCGCCTGGTCTTTCC  
264 -GCAGGTTTCCCAACT-GACACAAA--CCGTGCAACTTGAAACTCCGCCTGGTCTTTCC  
89 -GCAGGTTTCCCAACC-GACACAAA--CCGTGCAACTTGAAAGTTCCGCCTGGTCTTTCC  
95 -GCAGGTTTCCCAACT-GACACAAA--TCGTGCAACTTGAAACTCCGCCTGGTCTTTCC  
158 --CAGGTTCCCAACC-GACACAAA--CCGTGCAACTTGAAACTCCGCCTGGTCTTTCC  
211 -GCAGGTTTCCCAACT-GACACAAA--CCGTGCAACTTGAAAGCTCCGCCTGGTCTTTCC  
147 --CAGGTTCCCAACC-GACACAAA--CCGTGCAACTTGAAACTCCGCCTGGTCTTTCC  
163 --CAGGTTCCCAACC-GACACAAA--CCGTGCAACTTGAAACTCCGCCTGGTCTTTCC  
96 --CAGGTTCCCAACC-GACACAAA--CCGTGCAACTTGAAACTCCGCCTGGTCTTTCC  
159 --CAGGTTCCCAACC-GACACAAA--CCGTGCAACTTGAAACTCCGCCTGGTCTTTCC  
137 -GCAGGTTTCCACAAC-TGACACACA--CCGTGCAACTTGAAACTCCGCCTGGTCTTTCC  
176 -GCAGGTTTCCACAAC-TGACACACA--TCGTGCAACTTGAAACCCCGCTGGTCTTTCC  
138 -GCAGGTTTCCCAACT-GACACAAA--CCGTGCAACTTGAAACTCCGCCTGGTCTTTCC  
140 -GCAGGTTTCCCAACT-GACACACA--CCGTGCAACTTGAAACCCCGCTGGTCTTTCC  
149 -GCAGGTAGCCCAACT-GACACAAA--CCGTGCAACTTGAAACCCCGCTGGTCTTTCC  
188 ----GGTTTCCACAAC-TGACACAAA--CCGTGCAACTTGAAAGCTCCGCCTGGTCTTTCC  
139 -GCAGGTTTCCACAAC-TGACACACA--CCGTGCAACTTGAAACCCCGCTGGTCTTTCC  
187 -GCAGGTTTCCACAAC-TGACACAAA--CCGTGCAACTTGAAAGCTCCGCCTGGTCTTTCC  
186 -GCAGGTTTCCACAAC-TGACACAAA--CCGTGCAACTTGAAACTCCGCCTGGTCTTTCC  
184 --CAGGTTCCCAACC-GACACAAA--CCGTGCAACTTGAAACTCCGCCTGGTCTTTCC  
185 -GCAGGTTTCCCAACT-GACACAAA--CCGTGCAACTTGAAACTCCGCCTGGTCTTTCC  
97 -GCAGGTAGCCCAACT-GACACAAA--CCGTGCAACTTGAAACCCCGCTGGTCTTTCC  
164 --CAGGTACCACAACC-GACACAAA--CCGTGCAACTTGAAACTCCGCCTGGTCTTTCC  
165 -GCAGGTAGCCCAACT-GACACAAA--CCGTGCAACTTGAAACCCCGCTGGTCTTTCC  
90 --CAGGTTCCCAACC-GACACAAA--CCGTGCAACTTGAAACTCCGCCTGGTCTTTCC  
91 --CAGGTTCCCAACC-GACACAAA--CCGTGCAACTTGAAACTCCGCCTGGTCTTTCC  
243 --CAGGTTCCCAACC-GACACAAA--ACGTGCAACTTGAAATCCGCCTGGTCTTTCC

242 ---CAGGTTCCCAACC-GACACAAA---ACGTGCAACTTGAAATCCGCCTGGTCTTTCC  
252 ---CAGGTTCCCAACC-GACACAAA---ACGTGCAACTTGAAATCCGCCTGGTCTTTCC  
194 ---CAGGTTCCCAACC-GATACAAA---CCGTGCAACTTGAAACTCCGCCTGGTCTTTCC  
195 ---CAGGTTCCCAACC-GACACAAA---CCGTGCAACTTGAAACTCCGCCTGGTCTTTCC  
169 ---CAGGTTCCCAACC-GACACAAA---CCGTGCAACTTGAAACTCCGCCTGGTCTTTCC  
170 ---CAGGTTCCCAACC-GACACAAA---CCGTGCAACTTGAAACTCCGCCTGGTCTTTCC  
196 -GCAGGTTCCGCAACT-GACAAGAA---CCGTGCAACTTGAAAGTCCGCCTGGTCTTTCC  
197 -GCAGGTTCCCAACT-GACACAAA---TCGTGCAACTTGAAACTCCGCCTGGTCTTTCC  
231 -GCAGGTTCCACGACT-GACACAAA---CCGTGCAACTTGAAAGTCCGCCTGGTCTTTCC  
232 -GCAGGTTCCCAACT-GACACAAA---CCGTGCAACTTGAAACTCCGCCTGGTCTTTCC  
230 -GCAGGTTCCGCAACT-GACACGAA---CCGTGCAACTTGAAAGTCCGCCTGGTCTTTCC  
233 -GCAGGTTCCCAACT-GACACAAA---CCGTGCAACTTGAAACTCCGCCTGGTCTTTCC  
234 -GCAGGTTCCCAACT-GACACACA---ACGTGCAACTTGAAACTCCGCCTGGTCTTTCC  
235 -GCAGGTTCCCAACT-GACACACA---ACGTGCAACTTGAAACTCCGCCTGGTCTTTCC  
229 ---CAGGTTCCCAACC-GACACAAA---TCGTGCAACTTGAAACTCCGCCTGGTCTTTCC  
265 -----TCCCGCAACC-GACACAAA---ACGTGCAACTTGAAATCCGCCTGGTCTTTCC  
282 ---GCAGGTTCCCAACC-GACACAAAC---CCGTGCAACTTGAAACTCCGCCTGGTCTTTCC  
256 ---CAGGTTCCCAACC-GACACGAA---TCGTGCAACTTGAAACTCCGCCTGGTCTTTCC  
49 -GCAGGTTCCCAACT-GACACAAA---CCGTGCAACTTGAAAGTCCGCCTGGTCTTTCC  
50 -GCAGGTTCCCAACT-GACACAAA---TCGTGCAACTTGAAACTCCGCCTGGTCTTTCC  
48 -GCAGGTTCCCAACT-GACACAAA---TCGTGCAACTTGAAACTCCGCCTGGTCTTTCC  
63 -GCAGGTTCCCAACT-GACACAAA---CCGTGCAACTTGAAAGTCCGCCTGGTCTTTCC  
104 -GCAGGTTCCC---AACT-GACACAAA---CCGTGCAACTTGAAACTCCGCCTGGTCTTTCC  
93 -GCAGGTTCCCAACT-GACACAAA---TCGTGCAACTTGAAACTCCGCCTGGTCTTTCC  
94 -GCAGGTTCCCAACT-GACACAAA---TCGTGCAACTTGAAACTCCGCCTGGTCTTTCC  
92 -GCAGGTTCCCAACT-GACACAAA---TCGTGCAACTTGAAACTCCGCCTGGTCTTTCC  
167 -GCAGGTTCCCAACT-GACACACA---ACGTGCAACTTGAAACTCCGCCTGGTCTTTCC  
168 -GCAGGTTCCCAACT-GACACACA---ACGTGCAACTTGAAACTCCGCCTGGTCTTTCC  
64 -GCAGGTTCCCAACT-GACACAAA---TCGTGCAACTTGAAACTCCGCCTGGTCTTTCC  
181 -GCAGGTTCCACGACT-GACATAAA---TCGTGCAACTTGAAAGTCCGCCTGGTCTTTCC  
141 ---CAGGTTCCCAACC-GACACAAA---CCGTGCAACTTGAAACTCCGCCTGGTCTTTCC  
152 ---CAGGTTCCCAACC-GACACAAA---CCGTGCAACTTGAAACTCCGCCTGGTCTTTCC  
144 ---CAGGTTCCCAACC-GACACAAA---CCGTGCAACTTGAAACTCCGCCTGGTCTTTCC  
150 ---CAGGTTCCCAACC-GACACAAA---CCGTGCAACTTGAAACTCCGCCTGGTCTTTCC  
151 ---CAGGTTCCCAACC-GACACAAA---CCGTGCAACTTGAAACTCCGCCTGGTCTTTCC  
145 ---CAGGTTCCCAACC-GACACAAA---CCGTGCAACTTGAAACTCCGCCTGGTCTTTCC  
156 ---CAGGTTCCCAACC-GACACAAA---CCGTGCAACTTGAAACTCCGCCTGGTCTTTCC  
148 ---CAGGTTCCCAACC-GACACAAA---CCGTGCAACTTGAAACTCCGCCTGGTCTTTCC  
143 ---CAGGTTCCCAACC-GACACAAA---CCGTGCAACTTGAAACTCCGCCTGGTCTTTCC  
155 ---CAGGTTCCCAACC-GACACAAA---CCGTGCAACTTGAAACTCCGCCTGGTCTTTCC  
154 ---CAGGTTCCCAACC-GACACAAA---CCGTGCAACTTGAAACTCCGCCTGGTCTTTCC  
189 ---CAGGTTCCCAACC-GACACAAA---CCGTGCAACTTGAAACTCCGCCTGGTCTTTCC  
142 ---CAGGTTCCCAACC-GACACAAA---CCGTGCAACTTGAAACTCCGCCTGGTCTTTCC  
153 ---CAGGTTCCCAACC-GACACAAA---CCGTGCAACTTGAAACTCCGCCTGGTCTTTCC  
190 ---CAGGTTCCCAACC-GACACAAA---CCGTGCAACTTGAAACTCCGCCTGGTCTTTCC  
99 ---CAGGTTCCCAACC-GACACAAA---CCGTGCAACTTGAAACTCCGCCTGGTCTTTCC  
191 ---CAGGTTCCCAACC-GACACAAA---CCGTGCAACTTGAAACTCCGCCTGGTCTTTCC  
192 ---CAGGTTCCCAACC-GACACAAA---CCGTGCAACTTGAAACTCCGCCTGGTCTTTCC  
160 -GCAGGTTAGCCCAACT-GACACAAA---CCGTGCAACTTGAAACCCGCCTGGTCTTTCC  
180 -GCAGGTTCCCAACT-GACACAAA---CCGTGCAACTTGAAAGTCCGCCTGGTCTTTCC  
213 -GCAGGTTCCCAACT-GACACAAA---CCGTGCAACTTGAAACTCCGCCTGGTCTTTCC  
100 -GCAGGTTCCCAACT-GACACAAA---CCGTGCAACTTGAAACTCCGCCTGGTCTTTCC  
101 ---CAGGTTCCCAACC-GACACAAA---CCGTGCAACTTGAAACTCCGCCTGGTCTTTCC  
146 ---CAGGTTCCCAACC-GACACAAA---CCGTGCAACTTGAAACTCCGCCTGGTCTTTCC  
157 ---CAGGTTCCCAACC-GACACAAA---CCGTGCAACTTGAAACTCCGCCTGGTCTTTCC  
162 ---CAGGTTCCCAACC-GACACAAA---CCGTGCAACTTGAAACTCCGCCTGGTCTTTCC  
182 ---CAGGTTCCCAACC-GACACAAA---CCGTGCAACTTGAAACTCCGCCTGGTCTTTCC  
183 ---CAGGTTCCCAACC-GACACAAA---CCGTGCAACTTGAAACTCCGCCTGGTCTTTCC  
102 ---CAGGTTCCCAACC-GACACAAA---CCGTGCAACTTGAAACTCCGCCTGGTCTTTCC  
161 -GCAGGTTCCCAACT-GACATAAA---CCGTGCAACTTGAAAGTCCACCTGGTCTTTCC  
193 ---CAGGTTCCCAACC-GACACAAA---CCGTGCAACTTGAAACTCCGCCTGGTCTTTCC  
227 -GCAGGTTCCCAACT-GACACAAA---TCGTGCAACTTGAAACTCCGCCTGGTCTTTCC



254 -GCAGGTTCCACAACCT-GGCTTAAA--ACGTGCAATTTGAAACCCCGCCTGGTCTTTCC  
214 -GCAGGTCTCCACAACCT-GATACAAA--TCGTGCAACTTGAAACCCCGCCTGGTCTTTCC  
179 -GCAGGATCCACAACCT-GACACAAA--CCGTGCAACTTGAAAGCTCCGCCTGGTCTTTCC  
212 -GCAGGTTTCCCAACT-GACACAAA--CCGTGCAACTTGAAACCCCGCCTGGTCTTTCC  
241 -GCAGGTATCCCAACT-GACACAAA--CCGTGCAACTTGAAAGCTCCGCCTGGTCTTTCC  
210 -GCAGGTTTCCACAACCT-GACACAAA--CCGTGCAACTTGAAAGCTCCGCCTGGTCTTTCC  
223 AGCAGGTTTCCACAACCT-GACACACA--CCGTGCAATTTGAAACTCCGCCTGGTCTTTCC  
239 AGCAGGTTTCCACAACCT-GACACACA--CCGTGCAATTTGAAACTCCGCCTGGCCTTTCC  
262 -GCAGGTCTCCACAACCT-GACACAAA--ACGTGCAACTTGAAACCCCGCCTGGTCTTTCC  
240 -GCAGGTCTCCACAACCT-GACACAGA--ACGTGCAACTTGAAACCCCGCCTGGTCTTTCC  
284 -GCAGGTCTCCACAACCT-GACACAGA--ACGTGCAACTTGAAACCCCGCCTGGTCTTTCC  
251 -GCAGGTCTCCACAACCT-GACACAGA--ACGTGCAACTTGAAACCCCGCCTGGTCTTTCC  
263 -GCAGGTCTCCACAACCT-GACACAGA--ACGTGCAACTTGAAACCCCGCCTGGTCTTTCC  
250 -GCAGGTCTCCACAACCT-GACACAGA--ACGTGCAACTTGAAACCCCGCCTGGTCTTTCC  
224 -GCAGGTCTCCACAACCT-GACACAGA--ACGTGCAACTTGAAACCCCGCCTGGTCTTTCC  
237 -GCAGGTCTCCACAACCT-GACACAAA--CCGTGCAACTTGAAACTCCGCCTGGTCTTTCC  
281 -GCAGGTTTCC-CAACC-GACACAAC--CCGTGCAACTTGAAACTCCGCCTGGTCTTTCC  
221 -GCAGGTTTCCACAACCT-GACACACA--CCGTGCAATTTGAAACTCCGCCTGGTCTTTCC  
226 -GCAGGTCTCCACAACCT-GACACAAA--CCGTGCAATTTGAAACTCCGCCTGGTCTTTCC  
253 -GCAGGTCTCCACAACCT-GACACAAA--TCGTGCAACTTGAAACTCCGCCTGGTCTTTCC  
286 -GCAGGTCTCCACAACCT-GACACAAA--CCGTGCAACTTGAAACTCCGCCTGGTCTTTCC  
279 -GCAGGTTTCCACAACCT-GACACACA--TCGTGCAACTTGAAAGCTCCGCCTGGTCTTTCC  
287 --CAGGTTCCACAACC-GACACAAA--ACGTGCAACTTGAAATCCCGCCTGGTCTTTCC  
267 -GCAGGTTTCCCAACT-GACACAAA--CCGTGCAACTCGGAACTCCACCTGGTCTTTCC  
291 -GCAGGTATCCACAACCT-GACACAAA--CCGTGCAATTTGAAAGCTCCGCCTGGTCTTTCC  
301 -GCAGGTATCCACAACCT-GACACAAA--CCGTGCAATTTGAAAGCTCCGCCTGGTCTTTCC  
269 -GCAGGTTTCC-CAACC-GACACAAC--CCGTGCAACTTGAAACTCCGCCTGGTCTTTCC  
289 -GCAGGTTTCC-CAACC-GACACAAC--CCGTGCAACTTGAAACTCCGCCTGGTCTTTCC  
302 AGCAGGTCTCCACAACCT-GACACAAA--CCGTGCAACTTGAAACTCCGCCTGGTCTTTCC  
274 -GCAGGTTCCACAACC-GACACAAA--C-GTGCAACTTGGAATCCCGCCTGGTCTTTCC  
275 --CAGGTTCCACAACC-GACACAAA--C-GTGCAACT--GAAATCCCGCCTGGTCTTTCC  
297 -GCAGGTTCCACAACC-GACACAAA--CCGTGCAATTTGAAATCCCGCCTGGTCTTTCC  
304 -GCAGGTATCCACAACCT-GACACAAA--CCGTGCAATTTGAAACCCACCTGGTCTTTCC  
270 -GCAGGTATCCACAACCT-GACACAAA--CCGTGCAATTTGAAACCCCGCCTGGTCTTTCC  
298 -GCAGGTTTCCACAACCT-GACACACA--CCGTGCAATTTGAAAGCTCCGCCTGGTCTTTCC  
283 -GCAGGTTTCCACAACCT-GACACACA--CCGTGCAATTTGAAAGCTCCGCCTGGTCTTTCC  
300 -GCAGGTTTCCACAACCT-GACACACA--TCGTGCAACTTGAAAGCTCCGCCTGGTCTTTCC  
271 -GCAGGTATCCACAACCT-GACACAAA--CCGTGCAATTTGAAAGCTCCGCCTGGTCTTTCC  
272 -GCAGGTTTCCACAACCT-GACACGAA--CCGTGCAATTTGAAAGCTCCGCCTGGTCTTTCC  
273 -GCAGGTTTCCACAACCT-GACACAAA--CCGTGCAACTTGAAACTCCGCCTGGTCTTTCC  
285 -GCAGGTTTCCACAACCT-GACACAAA--CCGTGCAATTTGAAACTCCGCCTGGTCTTTCC  
303 -GCAGGTTTCC-CAACC-GACACAAC--CCGTGCAACTTGAAACTCCGCCTGGTCTTTCC  
309 --CAGGTTCCACAACC-AATACAAA--CCGTGCAACTTGGAATCCCGCCTGGTCTTTCC  
312 AGCAGGTTTCCACAACCT-GATAAAAC--TCGTGCAATTTGAAAGCTCCGCCTGGTCTTTCC  
313 -----TCCCTCAACT-GGTACAAA--CCGTGCAACTTGAAACCCCGCCTGGTCTTTCC  
316 -GCAGGTTTCTCAACT-GACACAAC--TCGTGCAACTGTAACCCCGCCTGGTCTTTCC  
318 -GCAGGTTTCTTAACT-GACACA-C--CCGTGCAATTTGAAAGTTCCGCCTGGTCTTTCC  
314 -GCAGGTTTCTCAACT-GACACAAC--TCGTGCAACTGTAACCCCGCCTGGTCTTTCC  
315 -GCAGGTTTCTCAACT-GACACAAC--TCGTGCAACTGTAACCCCGCCTGGTCTTTCC  
317 AGCAGGTTTCTCAACT-GACATA-C--CCGTGCAACTTGAAAGTTCCGCCTGGTCTTTCC  
  
310 AGGTCTAGAGGGGTGACACTTTGACAGGTGCTCGACTCCACGCCGGTCCACTGGCGGGT  
311 AGGTCTAGAGGGGTGACACTTTGACTGTGCTCGACTCCACGCTCGGTCCACTGGCGGGT  
307 AGGTCTAGAGGGGTAACTTTGACTGTGATTGACTCCACGCTCGGTCCACTGGCGAGT  
308 AGGTCTAGAGGGGTAACTTTGACTGTGATTGACTCCACGCTCGGTCCACCGCGGGT  
306 AGGTCTAGAGGGGTGACACTTTGACTGTGCTCGGCTCCACGCTCGGTCCACTGGTGGT  
276 AGGTCTAGAGGGGTGACACTTTGACTGTGCTCGACTCCACGCCGGTCCACTGGCGGGT  
277 AGGTCTAGAGGGGTAACTTTGACTGTGCTCGACTCCACGCCGGTCCACTGGCGGGA  
278 AGGTCTAGAGGGGTGACACTTTGACTGTGCTTACTCCACGCTCGGTCCACTGGCGGGT  
288 AGGTCTAGAGGGGTGACATTTTACTGTAATTGACTCCACGCTCGGTCCACTGGCGGGT  
305 ACGTCTAGAGGGGTGACACTTTGACTGTGATTGACTCCACGCTCGGTCCACTGGCGGGT  
290 AGGTCTAGAGGGGTAACTTTGACTGTGGTTGACTCCACGCTCGGTCCACTGGCGGGT

292 AGGTCTAGAGGGGTAACATTTTGTACTGTGTTTACTCCACGCTCGGTCCACCAGCGGGT  
244 AGGTCTAGAGGGGTGACATTTTGTACTGTGTTTACTCCACGCTTGGTCCACCAGCGGAGT  
257 AGGTCTAGAGGGGTGACACTTTTGTACTGTGCTTACTCCACGCTCGGTCCACTGGCGGGT  
299 AGGTCTAGAGGGGTAACACTTTTGTACTGTGTTTACTCCACGCTTGGTCCACTGGCGGGT  
245 AGGTCTAGAGGGGTAACACTTTTGTACTGTGCTTACTCCACGCTCGGTCCACTAGCGAGT  
258 AGGTCTAGAGGGGTGACACTTTTGTACTGTGCTTACTCCACGCTCGGTCCACTAGCGAGT  
236 AGGTCTAGAGGGGTGACACTTTTGTACTGTGCTTACTCCACGCTCGGTCCACTAGCGAGT  
246 AGGTCTAGAGGGGTGACACTTTTGTACTGTGCTTACTCCACGCTCGGTCCACTAGCGAGT  
259 AGGTCTAGAGGGGTAACACTTTTGTACTGTGTTTACTCCACGCTCGGTCCACCAGCGGGT  
268 AGGTCTAGAGGGGTGACATTTTGTACTGTAATTACTCCACGCTCGGTCCACTAGCGGGT  
280 AGGTCTAGAGGGGTGACATTTTGTACTGTAATTACTCCACGCTCGGTCCACTAGCGGGT  
247 AGGTCTAGAGGGGTGACACTTTTGTACTGTGCTTACTCCACGCTCGGTCCACTGGCGAGT  
220 AGGTCTAGAGGGGCGACACTTTTGTACTGTGTTTACTCCACGCTCGGTCCACTGGCGAGA  
222 AGGTCTAGAGGGGCGACACTTTTGTACTGTGATTACTCCACGCTCGGTCCACTGGCGAGT  
238 AGGTCTAGAGGGGCGACACTTTTGTACTGTGATTACTCCACGCTCGGTCCACTGGCGAGT  
248 AGGTCTAGAGGGGAGACACTTTTGTACTGTGCTTACTCCACGCTCGGTCCACTGGCGAGT  
261 AGGTCTAGAGGGGAGACATTTTGTACTGTGCTTACTCCACGCTCGGTCCACCAGCGGAGT  
249 AGGTCTAGAGGGGAGACACTTTTGTACTGTGCTTACTCCACGCTCGGTCCACTGGCGAGT  
293 AGGTCTAGAGGGGTGACATTTTGTACTGTAATTACTCCACGCTCGGTCCACTGGCGAGT  
294 AGGTCTAGAGGGGTAACACTTTTGTACTGTGATTACTCCACGCTCGGTCCACTGGCGAGT  
295 AGGTCTAGAGGGGTAACACTTTTGTACTGTGATTACTCCACGCTCGGTCCACTGGCGAGT  
296 AGGTCTAGAGGGGTAACACTTTTGTACTGTGATTACTCCACGCTCGGTCCACTAGCGAGT  
260 AGGTCTAGAGGGGTAACACTTTTGTACTGTGTTTACTCCACGCTCGGTCCACTGGCGAGT  
61 AGGTCTAGAGGGGTGACAAATTTTGTACTGTGTTTACTCCACGCTCGGTCCACTGGCGGGT  
132 AGGTCTAGAGGGGTAACACTTTTGTACTGTGATTACTCCACGCTCGGTCCACTAGCGGGT  
125 AGGTCTAGAGGGGCGACACTTTTGTACTGTGCTTACTCCACGCTCGGTCCACTAGCGAGT  
126 AGGTCTAGAGGGGTGACACTTTTGTACTGTGCTTACTCCACGCTCGGTCCACTGGCGGGT  
173 AGGTCTAGAGGGGCGACACTTTTGTACTGTGCTTACTCCACGCTCGGTCCACTAGCGGGT  
204 AGGTCTAGAGGGGCGACACTTTTGTACTGTGCTTACTCCACGCTCGGTCCACTAGCGGGT  
174 AGGTCTAGAGGGGCGACACTTTTGTACTGTGCTTACTCCACGCTCGGTCCACTGGCGGGT  
175 AGGTCTAGAGGGGCGACACTTTTGTACTGTGATTACTCCACGCTCGGTCCACTGGCGGGT  
205 AGGTCTAGAGGGGCGACACTTTTGTACTGTGCTTACTCCACGCTCGGTCCACTGGCGGGT  
127 AGGTCTAGAGGGGCGACACTTTTGTACTGTGATTACTCCACGCTCGGTCCACTGGCGGGT  
218 AGGTCTAGAGGGGCGACACTTTTGTACTGTGATTACTCCACGCTCGGTCCACTGGCGGGT  
217 AGGTCTAGAGGGGTAACATTTTGTACTGTGCTTACTCCACGCTCGGTCCACTGGCGGGT  
133 AGGTCTAGAGGGGTGACATTTTGTACTGTGCTTACTCCACGCTCGGTCCACTAGCGGAGT  
225 AGGTCTAGAGGGGTGACATTTTGTACTGTGCTTACTCCACGCTCGGTCCACTGGCGAGA  
228 AGGTCTAGAGGGGTGACATTTTGTACTGTGCTTACTCCACGCTCGGTCCACTAGCGAGT  
255 AGGTCTAGAGGGGTGACATTTTGTACTGTGCTTACTCCACGCTCGGTCCACTGGCGAGT  
266 AGGTCTAGAGGGGTGACGTTTTTGTACTGTGCTTACTCCACGCTTGGCCACTAGCGAGT  
1 AGGTCTAGAGGGGTAACACTTTTGTACTGTGTTTGGTCCACGCTCGATCCACTGGCGAGT  
2 AGGTCTAGAGGGGTAACACTTTTGTACTGTGTTTGGTCCACGCTCGATCCACTGGCGAGT  
3 AGGTCTAGAGGGGTAACACTTTTGTACTGTGTTTGGTCCACGCTCGATCCACTGGCGAGT  
4 AGGTCTAGAGGGGTAACACTTTTGTACTGTGTTTGGTCCACGCTCGATCCACTGGCGAGT  
5 AGGTCTAGAGGGGTAACACTTTTGTACTGCGTTTGGTCCACGCTCGATCCACTGGCGAGT  
7 AGGTCTAGAGGGGTGACACTTTTGTACTGTGTTTGGTCCACGCTCGATCCACTGGCGAGT  
9 AGGTCTAGAGGGGTGACACTTTTGTACTGTGTTTGGTCCACGTTTGGTCCACTGGCGAGT  
6 AGGTCTAGAGGGGTAACACTTTTGTACTGCGTTTGGTCCACGCTCGATCCACTGGCGAGT  
8 AGGTCTAGAGGGGTGACACTTTTGTACTGTGCTTGGTCCACGCTCGATCCACTGGCGAGT  
10 AGGTCTAGAGGGGTAACATGTTTGTACTGTGTTTGGTCCACGCTCGGTCCACCAGCGGAGT  
12 AGGTCTAGAGGGGTAACATGTTTGTACTGTGTTTGGTCCACGCTCGATCCACCAGCGGAGT  
11 AGGTCTAGAGGGGTAACACTTTTGTACTGTGTTTGGTCCACGTTTGGTCCACTGGCGAGT  
13 AGGTCTAGAGGGGTGACACTTTTGTACTGTGTTTGGTCCACGTTTGGTCCACTGGCGAGT  
22 AGGTCTAGAGGGGTGACACTTTTGTACTGTGTTTGGTCCACGTTTGGTCCACTGGCGAGT  
23 AGGTCTAGAGGGGTGACACTTTTGTACTGTGTTTGGTCCACGTTTGGTCCACTGGCGAGT  
18 AGGTCTAGAGGGGTGACACTTTTGTACTGTGTTTGGTCCACGTTTGGTCCACTGGCGAGT  
19 AGGTCTAGAGGGGTGACACTTTTGTACTGTGTTTGGTCCACGCTCGGTCCACTGGCGAGT  
14 AGGTCTAGAGGGGTAACATGTTTGTACTGTGTTTGGTCCACGCTCGATCCACCAGCGGAGT  
30 TGGTCTAGAGGGGTGACACTTTTGTACTGTGTTTGGTCCACGCTCGGTCCACTGGCGAGT  
24 AGGTCTAGAGGGGTGACACTTTTGTACTGTGTTTACTCCACGCTCGGTCCACTGGCGAGT  
35 AGGTCTAGAGGGGTGACACTTTTGTACTGTGTTTACTCCACGCTCGGTCCACTAGCGGGT  
31 AGGTCTAGAGGGGTGACAAATTTTGTACTGTGTTTACTCCACGCTCGGTCCACTGGCGAGT

36 AGGTCTAGAGGGGTGACACTTTGACTGTGTTTGACTCCACGCTCGGTCCACTGGCGAGT  
15 AGGTCTAGAGGGGCGACACTTTGACTGTGTTTGGCTCCACGCTTGACTCATCGGCGAGT  
21 AGGTCTAGAGGGGTGACACTTTGACTGTGTTTGACTCCACGCTCGATCCACTGGCGAGT  
20 AGGTCTAGAGGGGTGACACTTTGACTGTGTTTGGCTCCACGCTCGGTCCACTGGCGAGT  
27 AGGTCTAGAGGGGTGACACTTTGACTGTGTTTGGCTCCACGTTTCGATCCACTGGCGAGT  
16 AGGTCTAGAGGGGTGACACTTTGACTGTGTTTGGCTCCACGTTTCGATCCACTGGCGAGT  
17 AGGTCTAGAGGGGTGACACTTTGACTGTGTTTGGCTCCACGTTTCGATCCACTGGCGAGT  
79 AGGTCTAGAGGGGTAAACATTTTGTACTGTGTTTGACTCCACGCTCGATCCACTGGCGAGT  
32 AGGTCTAGAGGGGTGACAATTTGACTGTGTTTGACTCCACGCTCGGTCCACTGGCGAGT  
33 AGGTCTAGAGGGGTGACACTTTGACTGTGTTTGGCTCCACGCTCGACCCACTGGCGAGT  
37 AGGTCTAGAGGGGTGACACTTTGACTGTGTTTGACTCCACGTTTCGATCCACTGGCGAGT  
25 AGGTCTAGAGGGGTGACACTTTGACTGTGTTTGACTCCACGCTCGGTCCACTGGCGAGT  
26 AGGTCTAGAGGGGTGACACTTTGACTGTGTTTGGCTCCACGTTTGACCCACTGGCGAGT  
38 AGGTCTAGAGGGGTGACACTTTGACTGTGTTTGACTCCACGCTCGATCCACTGGCGAGT  
28 AGGTCTAGAGGGGTGACAATTTGACTGTGTTTGACTCCACGCTCGGCCACCAGCGGGT  
34 AGGTCTAGAGGGGTGACACTTTGACTGTGTTTGGCTCCGCTTCGATCCACCAGCGGGT  
29 AGGTCTAGAGGGGTGACACTTTGACTGTGTTTGACTCCACGCTCGGTCCACTGGCGAGT  
39 AGGTCTAGAGGGGTGACAATTTGACTGTGTTTGACTCCACGCTCGGTCCACCAGCGGAT  
40 AGGTCTAGAGGGGTGACAATTTGACTGTGTTTGACTCCACGCTCGGTCCACCAGCGGAGT  
58 AGGTCTAGAGGGGTAAACATTTTGTACTGTGTTTGACTCCACGCTCGATCCACTGGCGAGT  
59 AGGTCTAGAGGGGTGACATTTTGTACTGTGTTTGACTCCACGCTCGGTCCACTAGCGAGT  
81 AGGTCTAGAGGGGTAAACATTTTGTACTGTGTTTGACTCCACGCTCGATCCACTGGCGAGT  
82 AGGTCTAGAGGGGTGACACTTTGACTGTGTTTGACTCCACGCTCGGTCCACTAGCGAGT  
83 AGGTCTAGAGGGGCGACATTTTGTACTGTGTTTGACTCCACGCTCGGTCCACTAGCGAGT  
84 AGGTCTAGAGGGGTAAACATTTTGTACTGTGTTTGGCTCCACGCTCGATCCACTGGCGAGT  
130 AGGTCTAGAGGGGCGACATTTTGTACTGTGTTTGACTCCACGCTCGGTCCACTGGCGGGT  
131 AGGTCTAGAGGGGTAAACATTTGACTGTGATTGACTCCACGCTCGGTCCACTGGCGGGT  
51 AGGTCTAGAGGGGTAAACACTTTTGTACTGTGTTTGACTCCACGCTTGGTCCACTAGCGAGT  
52 AGGTCTAGAGGGGTAAACACTTTTGTACTGTGTTTGACTCCACGCTTGGTCCACTAGCGAGT  
53 AGGTCTAGAGGGGTAAACACTTTTGTACTGTGTTTGACTCCACGCTTGGTCCACTGGCGAGT  
67 AGGTCTAGAGGGGTAAACACTTTTGTACTGTGTTTGACTCCACGCTTGGTCCACTGGCGAGT  
66 AGGTCTAGAGGGGTGACACTTTGACTGCATTTGGCTCCACGCTCGATCCACTAGCGAGT  
107 AGGTCTAGAGGGGTGACATTTTGTACTGTGTTTGACTCCACGCTCGGTCCACTGGCGAGT  
105 AGGTCTAGAGGGGTGACAATTTGACTGTGTTTGACTCCACGCTCGGTCCACTGGCGAGT  
106 AGGTCTAGAGGGGTGACATTTTGTACTGTGTTTGACTCCACGCTCGGTCCACTGGCGAGT  
65 AGGTCTAGAGGGGTGACATTTTGTACTGTGTTTGACTCCACGCTCGGTCCACTGGCGAGT  
41 AGGTCTAGAGGGGTGACACTTTGACTGTGTTTGACTCCACGCTCGGTCCACTGGCGAGT  
43 AGGTCTAGAGGGGTGACACTTTGACTGTGTTTGACTCCACGCTCGGTCCACTGGCGAGT  
98 AGGTCTAGAGGGGTGGCATTTTGACTGTGTTTGACTCCACGCTCGGTCCACTAGCGAGT  
44 AGGTCTAGAGGGGTGACATTTTGTACCCTGCTTGACTCCACGCTCGATCCACTGGCGAGT  
108 AGGTCTAGAGGGGTGACATTTTGTACTGTGTTTGACTCCACGCTCGGTCCACTAGCGCGT  
109 AGGTCTAGAGGGGTAAACATTTTGTACTGTGTTTGACTCCACGCTCGATCCACTAGCGAGT  
68 AGGTCTAGAGGGGTGACAATTTGACTGTGTTTGACTCCACGCTCGGTCCACTAGCGAGT  
54 AGGTCTAGAGGGGTAAACACTTTTGTACTGTGTTTGACTCCACGCTCGGTCCACTAGCGAGT  
56 AGGTCTAGAGGGGTAAACATTTTGTACTGTGTTTGACTCCACGCTCGATCCACTAGCGAGT  
74 AGGTCTAGAGGGGTAAACATTTTGTACTGTGTTTGACTCCACGCTCGATCCACTAGCGAGT  
55 AGGTCTAGAGGGGTAAACATTTTGTACTGTGTTTGACTCCACGCTCGATCCACTAGCGAGT  
57 AGGTCTAGAGGGGTAAACACTTTTGTACTGAGTTTGACTCCACGCTCGATCCACTAGCGAGT  
80 AGGTCTAGAGGGGTGACACTTTGACTGTGTTTGGCTCCACGCTCGATCCACTAGCGAGT  
72 AGGTCTAGAGGGGTAAACATTTTGTACTGTGTTTGACTCCACGCTCGATCCACTAGCGAGT  
110 AGGTCTAGAGGGGTAAACATTTTGTACTGTGTTTGACTCCACGCTCGATCCACTAGCGAGT  
73 AGGTCTAGAGGGGTAAACATTTTGTACTGTGTTTGACTCCACGCTCGATCCACTAGCGAGT  
69 AGGTCTAGAGGGGTAAACATTTTGTACTGTGTTTGACTCCACGCTCGATCCACTAGCGAGT  
70 AGGTCTAGAGGGGTAAACATTTTGTACTGTGTTTGACTCCACGCTCGATCCACTAGCGAGT  
71 AGGTCTAGAGGGGTAAACATTTTGTACTGTGTTTGACTCCACGCTCGATCCACTAGCGAGT  
111 AGGTCTAGAGGGGTAAACATTTTGTACTGTGTTTGACTCCACGCTCGATCCACTAGCGAGT  
112 AGGTCTAGAGGGGTAAACATTTTGTACTGTGTTTGACTCCACGCTCGATCCACTAGCGAGT  
113 AGGTCTAGAGGGGTAAACATTTTGTACTGTGTTTGACTCCACGCTCGATCCACTAGCGAGT  
76 AGGTCTAGAGGGGTAAACATTTTGTACTGCGTTTGACTCCACGCTCGATCCACTAGCGAGT  
77 AGGTCTAGAGGGGTAAACATTTTGTACTGTGTTTGACTCCACGCTCGATCCACTAGCGAGT  
75 AGGTCTAGAGGGGTAAACATTTTGTACTGTGTTTGACTCCGCGCTCGATCCACTAGCGAGT  
114 AGGTCTAGAGGGGTAAACATTTTGTACTGTGTTTGACTCCACGCTCGATCCACTAGCGAGT

78 AGGTCTAGAGGGGTAACATTTTGTACTGTGTTTACTCCACGCTCGATCCACTAGCGAGT  
115 AGGTCTAGAGGGGTAACATTTTGTACTGTGTTTACTCCACGCTCGATCCACTAGCGAGT  
116 AGGTCTAGAGGGGTAACATTTTGTACTGTGTTTACTCCACGCTCGATCCACTAGCGAGT  
60 AGGTCTAGAGGGGTGACACTTTGTACTGTGCTTACTCCACGCTCGGTCCACTGGCGAGT  
216 AGGTCTAGAGGGGTGACACTTTGTACTGTGCTTACTCCACGCTCGGTCCACTGGCGAGT  
166 AGGTCTAGAGGGGTGACACTTTGTACTGTGCTTACTCCACGCTCGGTCCACTAGCGAGT  
215 AGGTCTAGAGGGGTGACACTTTTGTACTGTGCTTACTCCACGCTCGGTCCACTAGCGAGT  
103 AGGTCTAGAGGGGTGACACTTTTGTACTGTGCTTACTCCACGCTCGGTCCACTGGCGAGT  
42 AGGTCTAGAGGGGTGACACTTTGTACTGTGTTTGGCTCCACGCTCGGTCCACTAGCGAGT  
46 AGGTCTAGAGGGGTGACACTTTGTACTGTGTTTACTCCACGCTCGGTCCACTAGCGAGT  
47 AGGTCTAGAGGGGTGACACTTTTGTACTGTGCTCGACTCCACGCTCGGTCCACTGGCGAGT  
45 AGGTCTAGAGGGGTGACACTTTTGTACTGTGCTTACTCCACGCTCGATCCACTGGCGAGT  
62 AGGTCTAGAGGGGTGACACTTTTGTACTGTGCTTGGCTCCACGCTCGATCCATCGCGAGT  
86 AGGTCTAGAGGGGTGACACTTTGTACTGTGCTTGGCTCCACGCTCGATCCATCGCGAGT  
88 AGGTCTAGAGGGGTGACACTTTGTACTGTGCTTGGCTCCACGCTCGATCCATCGCGAGT  
87 AGGTCTAGAGGGGTGACACTTTTGTACTGTGCTTGGCTCCACGCTCGATCCATCGCGAGT  
135 AGGTCTAGAGGGGTGACACTTTTGTACTGTGCTTGGCTCCACGCTCGATCCATCGCGAGT  
85 AGGTCTAGAGGGGTGACACTTTTGTACTGTGCTTGGCTCCACGCTCGATCCATCGCGAGT  
134 AGGTCTAGAGGGGTGACACTTTTGTACTGTGCTTGGCTCCACGCTCGATCCATCGCGAGT  
117 AGGTCTAGAGGGGTAACACTTTTGTACTGTGTTTACTCCACGCTCGATCCACTGGCGAGT  
118 AGGTCTAGAGGGGCGACACTTTTGTACTGTGATTGACTCCACGCTCGGTCCACTAGCGAGT  
199 AGGTCTAGAGGGGTGACACTTTTGTACTGTGCTTACTCCACGCTCGGTCCACTAGCGAGT  
200 AGGTCTAGAGGGGCGACACTTTTGTACTGTGCTTACTCCACGCTCGGTCCACTAGCGAGT  
119 AGGTCTAGAGGGGCGACACTTTTGTACTGTGCTTACTCCACGCTCGGTCCACTAGCGAGT  
198 AGGTCTAGAGGGGTGACACTTTTGTACTGTGCTTACTCCACGCTCGGTCCACTAGCGAGT  
207 AGGTCTAGAGGGGCGACACTTTTGTACTGTGATTGACTCCACGCTCGGTCCACTGGCGAGT  
219 AGGTCTAGAGGGGCGACACTTTTGTACTGTGATTGACTCCACGCTCGGTCCACTAGCGAGT  
206 AGGTCTAGAGGGGCGACACTTTTGTACTGTGATTGACTCCACGCTCGGTCCACTGGCGAGT  
121 AGGTCTAGAGGGGCGACACTTTTGTACTGTGCTTACTCCACGCTCGGTCCACTAGCGAGT  
201 AGGTCTAGAGGGGCGACACTTTTGTACTGTGCTTACTCCACGCTCGGTCCACTAGCGAGT  
122 AGGTCTAGAGGGGCGACACTTTTGTACTGTGCTTACTCCACGCTCGGTCCACTAGCGAGT  
120 AGGTCTAGAGGGGCGACACTTTTGTACTGTGCTTACTCCACGCTCGGTCCACTAGCGAGT  
202 AGGTCTAGAGGGGCGACACTTTTGTACTGTGCTTACTCCACGCTCGGTCCACTAGCGAGT  
203 AGGTCTAGAGGGGCGACACTTTTGTACTGTGCTTACTCCACGCTCGGTCCACTAGCGAGT  
171 AGGTCTAGAGGGGTGACACTTTTGTACTGTGCTTACTCCACGCTCGGTCCACTAGCGAGT  
172 AGGTCTAGAGGGGCGACACTTTTGTACTGTGCTTACTCCACGCTCGGTCCACTAGCGAGT  
123 AGGTCTAGAGGGGCGACACTTTTGTACTGTGCTTACTCCACGCTCGGTCCACTAGCGAGT  
124 AGGTCTAGAGGGGCGACACTTTTGTACTGTGCTTACTCCACGCTCGGTCCACTAGCGAGT  
128 AGGTCTAGAGGGGCGACACTTTTGTACTGTGATTGACTCCACGCTCGGTCCACTGGCGAGT  
129 AGGTCTAGAGGGGCGACACTTTTGTACTGTGATTGACTCCACGCTCGGTCCACTAGCGAGT  
177 AGGTCTAGAGGGGCGACACTTTTGTACTGTGATTGACTCCACGCTCGGTCCACTAGCGAGT  
209 AGGTCTAGAGGGGCGACACTTTTGTACTGTGCTTACTCCACGCTCGGTCCACTAGCGAGT  
178 AGGTCTAGAGGGGCGACACTTTTGTACTGTGCTTGGCTCCACGCTCGGTCCACTAGCGAGT  
208 AGGTCTAGAGGGGTAACAATTTTGTACTGTGATTGACTCCACGCTCGGTCCACTAGCGAGT  
136 AGGTCTAGAGGGGTAACAATTTTGTACTGTGATTGACTCCACGCTCGGTCCACTGGCGAGA  
264 AGGTCTAGAGGGGTGACACTTTTGTACTGTGATTGACTCCACGCTCGGCCACTAGCGAGT  
89 AGGTCTAGAGGGGTGACACTTTTGTACTGTGTTTACTCCACGCTCGGTCCACTGGCGAGT  
95 AGGTCTAGAGGGGTGACACTTTTGTACTGTGCTTACTCCACGCTCGGTCCACTAGCGAGT  
158 AGGTCTAGAGGGGTGGCATTTTGTACTGTGCTTACTCCACGCTCGGTCCACTAGCGAGT  
211 AGGTCTAGAGGGGTGTCATACTGTACTGTGCTTACTCCACACTCGGTCCACTAGCGAGT  
147 AGGTCTAGAGGGGTGGCATTTTGTACTGTGCTTACTCCACGCTCGGTCCACTAGCGAGT  
163 AGGTCTAGAGGGGTGACACTTTTGTACTGTGCTTACTCCACGCTCGGTCCACTAGCGAGT  
96 AGGTCTAGAGGGGTGACACTTTTGTACTGTGTTTACTCCACGCTCGGTCCACTAGCGAGT  
159 AGGTCTAGAGGGGTGACACTTTTGTACTGTGTTTACTCCACGCTCGGTCCACTGGCGAGT  
137 AGGTCTAGAGGGGTGACACTTTTGTACTGTGATTGACTCCACGCTCGGTCCACTGGCGAGT  
176 AGGTCTAGAGGGGCGACACTTTTGTACTGTGATTGACTCCACGCTCGGTCCACTGGCGAGT  
138 AGGTCTAGAGGGGCGACACTTTTGTACTGTGATTGACTCCACGCTCGGTCCACTGGCGAGT  
140 AGGTCTAGAGGGGTGGCATTTTGTACTGTGCTTACTCCACGCTCGGTCCACTGGCGAGT  
149 AGGTCTAGAGGGGTGGCATTTTGTACTGTGCTTACTCCACGCTCGGTCCACTGGCGAGT  
188 AGGTCTAGAGGGGTGGCATTTTGTACTGTGCTTACTCCACGCTCGGTCCACTGGCGAGT  
139 AGGTCTAGAGGGGCGACACTTTTGTACTGTGATTGACTCCACGCTCGGTCCACTGGCGAGT  
187 AGGTCTAGAGGGGTAACACTTTTGTACTGTGCTTACTCCACGCTCGGTCCACTGGCGAGT

186 AGGTCTAGAGGGGTAACACTTTGACTGTGCTTGACTCCACGCTCGGTCCACTAGCGAGT  
184 AGGTCTAGAGGGGTGACACTTTGACTGTGCTTGACTCCACGCTCGGTCCACTAGCGAGT  
185 AGGTCTAGAGGGGTGACACCTTGACTGTGTTTGACTCCACGCTCGGTCCACCAGCGAGT  
97 AGGTCTAGAGGGGTGACACCTTGACTGTGTTTGACTCCACGCTCGGTCCACTGGCGAGT  
164 AGGTCTAGAGGGGTGACACCTTGACTGTGTTTGACTCCACGCTCGGTCCACTGGCGAGT  
165 AGGTCTAGAGGGGTGGCATTGTTGACTGTGCTTGACTCCACGCTCGGTCCACTAGCGAGT  
90 AGGTCTGAGGGGTGACATTTTGTACTGTGCTTGACTCCACGCTCGGTCCACTGGCGAGA  
91 AGGTCTAGAGGGGTGACATTTTGTACTGTGTTTGACTCCACGCTTGGTCCACCAGCGAGA  
243 AGGTCTAGAGGGGTGACATTTTGTACTGTGCTTGACTCCACGCTTGGTCCACTGGCGAGA  
242 AGGTCTAGAGGGGTGACACTTTGACTGTGATTGACTCCACGCTCGGCCACTGGCGAGT  
252 AGGTCTAGAGGGGTGACATTTTGTACTGTGCTTGACTCCACGCTCGGTCCACTGGCGAGT  
194 AGGTCTAGAGGGGTGACATTTTGTACTGTGCTTGACTCCACGCTCGGTCCACTGGCGAGT  
195 AGGTCTAGAGGGGTGACACTTTGACTGTGCTTGACTCCACGCTCGGTCCACTGGCGAGA  
169 AGGTCTAGAGGGGTGGCATTGTTGACTGTGCTTGACTCCACGCTCGGTCCACTGGCGAGT  
170 AGGTCTAGAGGGGTGGCATTGTTGACTGTGCTTGACTCCACGCTCGGTCCACTAGCGGGT  
196 AGGTCTAGAGGGGTGACATTTTGTACTGTGTTTGACTCCACGCTTGGTCCACCAGCGAGT  
197 AGGTCTAGAGGGGTGACATTTTGTACTGTGTTTGACTCCACGCTCGGTCCACTAGCGAGT  
231 AGGTCTAGAGGGGTGACACTTTGACTGTGCTTGACTCCACGCTCGGTCCACTAGCGAGT  
232 AGGTCTAGAGGGGTAACACTTTGACTGTGTTTGACTCCACGCTCGGTCCACCAGCGAGT  
230 AGGTCTAGAGGGGTGACATTTTGTACTGTGCTTGACTCCACGCTCGGTCCACTAGCGAGT  
233 AGGTCTAGAGGGGTGACACTTTGACTGTGCTTGACTCCACGCTCGGTCCACTAGCGAGT  
234 AGGTCTAGAGGGGTGACACTTTGACTGTGCTTGACTCCACGCTCGGTCCACTAGCGAGT  
235 AGGTCTAGAGGGGTGACACTTTGACTGTGCTTGACTCCACGCTCGGTCCACTAGCGAGT  
229 AGGTCTAGAGGGGTAACACTTTGACTGTGTTTGACTCCACGCTTGGTCCACTTGGCGGT  
265 AGGTCTAGAGGGGTGACACTTTGACTGTGATTGACTCCACGCTCGGTCCACTAGCGAGT  
282 AGGTCTAGAGGGGTGACACTTTGACTGTGCTTGACTCCACGCTCGGTCCACTGGCGAGT  
256 AGGTCTAGAGGGGTGACACTTTGACTGTGTTTGACTCCACGCTCGGTCCACTAGCGAGT  
49 AGGTCTAGAGGGGTGACATTTTGTACTGTGTTTGACTCCACGCTTGGTCCACCAGCGAGT  
50 AGGTCTAGAGGGGTAACACTTTGACTGTGCTTGACTCCACGCTTGGTCCACTAGCGAGT  
48 AGGTCTAGAGGGGTGACACTTTGACTGTGTTTGACTCCACGCTCGGTCCACTGGCGAGA  
63 AGGTCTAGAGGGGTGACATTTTGTACTGTGTTTGACTCCACGCTTGGTCCACCAGCGAGT  
104 AGGTCTAGAGGGGTGACAATTTGACTGTGTTTGACTCCACGCTCGGTCCACTGGCGAGT  
93 AGGTCTAGAGGGGTGACATTTTGTACTGTGTTTGACTCCACGCTTGGTCCACCAGCGAGA  
94 AGGTCTAGAGGGGTGACATTTTGTACTGTGTTTGACTCCACGCTTGGTCCACCAGCGAGT  
92 AGGTCTAGAGGGGTGACACTTTTGTACTGTGTTTGACTCCACGCTTGGTCCACCAGCGAGA  
167 AGGTCTAGAGGGGTGACACTTTTGTACTGTGCTTGACTCCACGCTCGGTCCACTGGCGAGT  
168 AGGTCTAGAGGGGTGGCATTGTTGACTGTGCTTGACTCCACGCTCGGTCCACTGGCGAGT  
64 AGGTCTAGAGGGGTGACACTTTTGTACTGTGCTTGACTCCACGCTCGGTCCACTGGCGAGT  
181 AGGTCTAGAGGGGTGGCATTGTTGACTGTGCTTGACTCCACGCTCGGTCCACTGGCGAGT  
141 AGGTCTAGAGGGGTGGCATTGTTGACTGTGCTTGACTCCACGCTCGGTCCACTGGCGAGT  
152 AGGTCTAGAGGGGTGGCATTGTTGACTGTGCTTGACTCCACGCTCGGTCCACTGGCGAGT  
144 AGGTCTAGAGGGGTGGCATTGTTGACTGTGCTTGACTCCACGCTCGGTCCACTGGCGAGT  
150 AGGTCTAGAGGGGTGGCATTGTTGACTGTGCTTGACTCCACGCTCGGTCCACTGGCGAGT  
151 AGGTCTAGAGGGGTGGCATTGTTGACTGTGCTTGACTCCACGCTCGGTCCACTGGCGAGT  
145 AGGTCTAGAGGGGTGGCATTGTTGACTGTGCTTGACTCCACGCTCGGTCCACTGGCGAGT  
156 AGGTCTAGAGGGGTGGCATTGTTGACTGTGCTTGACTCCACGCTCGGTCCACTGGCGAGT  
148 AGGTCTAGAGGGGTGACACCTTGACTGTGTTTGACTCCACGCTCGGTCCACTGGCGAGT  
143 AGGTCTAGAGGGGTGGCATTGTTGACTGTGCTTGACTCCACGCTCGGTCCACTGGCGAGT  
155 AGGTCTAGAGGGGTGGCATTGTTGACTGTGCTTGACTCCACGCTCGGTCCACTGGCGAGT  
154 AGGTCTAGAGGGGTGGCATTGTTGACTGTGCTTGACTCCACGCTCGGTCCACTGGCGAGT  
189 AGGTCTAGAGGGGTGGCATTGTTGACTGTGCTTGACTCCACGCTCGGTCCACTGGCGAGT  
142 AGGTCTAGAGGGGTGGCATTGTTGACTGTGCTTGACTCCACGCTCGGTCCACTGGCGAGT  
153 AGGTCTAGAGGGGTGGCATTGTTGACTGTGCTTGACTCCACGCTCGGTCCACTGGCGAGT  
190 AGGTCTAGAGGGGTGGCATTGTTGACTGTGCTTGACTCCACGCTCGGTCCACTGGCGAGT  
99 AGGTCTAGAGGGGTGACATTTTGTACTGTGTTTGACTCCACGCTCGATCCACTGGCGAGT  
191 AGGTCTAGAGGGGTGACATTTTGTACTGTGCTTGACTCCACGCTCGGTCCACTGGCGAGT  
192 AGGTCTAGAGGGGTGACATTTTGTACTGTGCTTGACTCCACGCTCGGTCCACTGGCGAGT  
160 AGGTCTAGAGGGGTGACATTTTGTACTGTGTTTGACTCCACGCTCGGTCCACTGGCGAGT  
180 AGGTCTAGAGGGGTGACATTTTGTACTGTGTTTGACTCCACGCTTGGTCCACCAGCGAGT  
213 AGGTCTAGAGGGGTGACATTTTGTACTGTGTTTGACTCCACGCTTGGTCCACCAGCGAGT  
100 AGGTCTAGAGGGGTGGCATTGTTGACTGTGCTTGACTCCACGCTCGGTCCACTGGCGAGT  
101 AGGTCTAGAGGGGTGGCATTGTTGACTGTGCTTGACTCCACGCTCGGTCCACTGGCGAGT



307 GTT-AGTAGTGGTATTGTTGCTTCGTAGCGGAGCATGGTGGCCGCGGGAACCCCCCTTG  
308 GGC-AGTAGCAGCACTGTTGTTTCGTAGCGGAGCATGGTGGCCGTGGGAACCCCCCTTG  
306 GCT-AGTAGTGGTACTGTTGTTTCGTACCGGAGCATGGTGGCCGTGGGACTCCCTCCTTG  
276 GTT-AGTAGCAGCACTGTTGTTTCGTAGCGGAGCATGGTGGCCGTGGGAACCCCCCTTG  
277 GTG-AGTAGCAGAAGTGTGCTTCGTAGCGGAGCATGGTGGCCGTGGGAACCCCCCTTG  
278 GTG-AGTAGCAGAAGTGTGCTTCGTAGCGGAGCATGGTGGCCGTGGGAACCCCCCTTG  
288 GTT-AGTAGCAGCACTGTTGTTTCGTAGCGGAGCATGGTGGCCGTGGGAATCCTCCTTG  
305 GTT-AGTAACAGCACTGTTGCTTCGTAGCGGAGCATGGTGGCCGCGGGAATCCTCCTTG  
290 GTT-AGTAGCAGCACTGTTGCTTCGTAGCGGAGCATGGTGGCCGTGGGAATCCCCCTTG  
292 GTT-AGTAGCTGTATTGTTGCTTCGTAGCGGAGCATAATGGCCGTGGGACTCCCTCCTTG  
244 GTG-AGTAGTAGAAGTGTGCTTCGTAGCGGAGCATGGTGGCCGTGGGAACCCCCCTTG  
257 GTG-AGTAGCAGAAGTGTGCTTCGTAGCGGAGCATGGTGGCCGTGGGAATCCCCCTTG  
299 GTG-AGTAGCAGAAGTGTGCTTCGTAGCGGAGCATGGTGGCCGTGGGAATCCTCCTTG  
245 GTT-AGTAATAGCACTGTTGTTTCGTAGCGGAGCATGATGGCCGCGGGAACCCCCCTTG  
258 GTT-AGTAACAGCACTGTTGCTTCGTAGCGGAGCATGATGGCCGCGGGAACCCCTCCTTG  
236 GTT-AGTAACAGCACTGTTGCTTCGTAGCGGAGCATGGTGGCCGTGGGATCCTCCTTG  
246 GTT-AGTAGCAACACTGTTGTTTCGTAGCGGAGCATGATGGCCGTGGGAATCCTCCTTG  
259 GCT-AGTAGTGGTACCGTTGTTTCGTAGCGGAGCATGGTGGCCGTGGGAATCCTCCTTG  
268 GCT-AGTAGTGGTACCGTTGCTTCGTAGCGGAGCATAGTGGCCGTGGGAATCCTCCTTG  
280 GTT-AGTAGCTGTATTGTTGCTTCGTAGCGGAGCATAATGGCCGTGGGATCCTCCTTG  
247 GTT-AGTAGCGGCACTGTTGCTTCGTAGTGGAGCATGATGGCCGCGGGAATCCTCCTTG  
220 G-T-AGTAACAGCACTGTTGCTTCGTAGCGGAGCATGATGGCCGTGGGATCCTCCTTG  
222 GTT-AGTAGCGGCACTGTTGCTTCGTAGCGGAGCATGATGGCCGCGGGAACCCCTCCTTG  
238 GTT-AGTAGCGGCACTGTTGCTTCGTAGCGGAGCATGATGGCCGCGGGAACCCCTCCTTG  
248 GTT-AGTAGCGGCACTGTTGCTTCGTAGCGGAGCATGATGGCCGCGGGAATCCTCCTTG  
261 GTT-AGTAGCGGCACTGTTGCTTCGTAGCGGAGCATGAAGGCCGCGGGAACCCCCCTTG  
249 GTT-AGTAGCGGCACTGTTGCTTCGTAGCGGAGCATGATGGCCGCGGGGCTCCCTCCTTG  
293 GTA-AGTAGTAGTACTGTTGCTTCGTAGCGGAACATGGTGGCCGTGGGACTCCCTCCTTG  
294 GTA-AGTAGTAGTACTGTTGCTTCGTAGCGGAACATGGTGGCCGTGGGACTCCCTCCTTG  
295 GTA-AGTAGTAGTACTGTTGCTTCGTAGCGGAACATGGTGGCCGTGGGAATACCCCTTG  
296 GTG-AGTAGCAGAAGTGTGCTTCGTAGCGGAGCATGGTGGCCGTGGGAATCCTCCTTG  
260 GTT-AGTAGCGGCACTGTTGCTTCGTAGCGGAGCATGATGGCCGCGGGAATCCTCCTTG  
61 GTT-AGTAACAGCACTGTTGCTTCGTAGCGGAGCATGAAGGCCGTGGGACCTCCTCCTTG  
132 GTT-AGTAACAGCACTGTTGCTTCGTAGCGGAGCATGGTGGCCGCGGGAACCTCCTCCTTG  
125 GTT-AGTAACAGCACTGTTGTTTCGTAGCGGAGCATGATGGCCGTGGGACTCCTCCTTG  
126 GTT-AGTAACAGCACTGTTGTTTCGTAGCGGAGCATGATGGCCGTGGGACTCCTCCTTG  
173 GTT-AGTAACAGCACTGTTGTTTCGTAGCGGAGCATGGTGGCCGTGGGGTTCCTCCTTG  
204 GTT-AGTAACAGCACTGTTGTTTCGTAGCGGAGCATGGTGGCCGTGGGACTCCTCCTTG  
174 GTT-AGTAACAGCACTGTTGTTTCGTAGCGGAGCATGATGGCCGTGGGACTCCTCCTTG  
175 GTT-AGTAACAGCACTGTTGTTTCGTAGCGGAGCATGATGGCCGTGGGACTCCTCCTTG  
205 GTT-AGTAACAGCACTGTTGTTTCGTAGCGGAGCATGATGGCCGTGGGACTCCTCCTTG  
127 GTT-AGTAACAGCACTGTTGTTTCGTAGCGGAGCATGATGGCCGTGGGACTCCTCCTTG  
218 GTT-AGTAACAGCACTGTTGTTTCGTAGCGGAGCATGATGGCCGTGGGACTCCTCCTTG  
217 GTT-AGTAACAGCACTGTTGTTTCGTAGCGGAGCATGATGGCCGTGGGACTCCTCCTTG  
133 GTT-AGTAACAGCACTATTGCTTCGTAGCGGAGCATGATGGCCGTGGGACCTCCTCCTTG  
225 GTT-AGTAACAGCACTGTTGCTTCGTAGCGGAGCATGATGGCCGTGGGACTCCTCCTTG  
228 GTT-AGTAACAGCACTGTTGCTTCGTAGCGGAGCATGATGGCTGTGGGAACCTCCTCCTTG  
255 GTT-AGTAACAGTACTGCTGCTTCGTAGCGGAACACCGTGGCCGTGGGAACCCCCCTTG  
266 GTT-AGTAACAGCACTGTTGCTTCGTAGCGGAGCATGATGGCCGCGGGAACCCCCCTTG  
1 GTT-AGTAACAGCACTGTTGCTTCGTAGCGGAGCATGACGGCCGTGGGAACCTCCTCCTTG  
2 GTT-AGTAACAGCACTGTTGCTTCGTAGCGGAGCATGACGGCCGTGGGAACCTCCTCCTTG  
3 GTT-AGTAACAGCACTGTTGCTTCGTAGCGGAGCATGACGGCCGTGGGAACCTCCTCCTTG  
4 GTT-AGTAACAGCACTGTTGCTTCGTAGCGGAGCATGACGGCCGTGGGAACCTCCTCCTTG  
5 GTT-AGTAACAGCACTGTTGCTTCGTAGCGGAGCATGACGGCCGTGGGAACCTCCTCCTTG  
7 GTT-AGTAGCAGCACTGTTGCTTCGTAGCGGAGCATGACGGCCGTGGGAACCTCCTCCTTG  
9 GCT-AGTAACAGCACTGTTGCTTCGTAGCGGAGCATGACGGCCGTGGGAACCTCCTCCTTG  
6 GTT-AGTAACAGCACTGTTGCTTCGTAGCGGAGCATGACGGCCGTGGGAATCCTCCTTG  
8 GTT-AGTAACAACACTGCTACTTCGTAGCGGAGCATGACGGCCGTGGGAACCCCCCTTG  
10 GTT-AGTAACAACACTGCTACTTCGTAGCGGAGCATGACGGCCGTGGGAACCCCCCTTG  
12 GTT-AGTAACAACACTGCTACTTCGTAGCGGAGCATGACGGCCGTGGGAACCCCCCTTG  
11 ACT-AGTAACAGCACTGTTGCTTCGTAGCGGAGCATGACGGCCGTGGGAACCTCCTCCTTG  
13 ACT-AGTAACAGCACTGTTGCTTCGTAGCGGAGCATGTCGGCCGTGGGAATCCTCCTTG

22 GTT-AGTAACACCACTGCTGCTTCGTAGCGGAGCATGACGGCCGTGGGAATTCCTCCTTG  
 23 GTT-AGTAACGGCACTGTTGCTTCGTAGCGGAGCATGACGGCCGCGGGAAATTCCTCCTTG  
 18 GTT-AGTAACAGCACCGTTGCTTCGTAGCGGAGCATGATGGCCGTGGGAACCTCCTCCTTG  
 19 GTT-AGTAACAGCACTGTTGCTTCGTAGCGGAGCATGATGGCCGTGGGGCTTCCTCCTTG  
 14 GTT-AGTAGCAGCACTGTTGCTTCGTAGCGGAGCATGATGGCCGTGGGAACCTCCTCCTTG  
 30 GCT-AGTAGCAGCACTGTCGTCTCGTAGCGGAGCATGATGGCCGTGGGAACCTCCTCCTTG  
 24 GTT-AGTAACGGCACTGTTGCTTCGTAGCGGAGCATGACGGCCGCGGGAGCTCCTCCTTG  
 35 GTT-AGTAACAGCACTGTTGTTTCGTAGCGGAGCATGATGGCCGTGGGAACCTCCTCCTTG  
 31 GCT-AGTAGCAGCACTGTCGTCTCGTAGCGGAGCATGATGGCCGTGGGAACCTCCTCCTTG  
 36 GCT-AGTAGCAGCACTGTCGTCTCGTAGCGGAGCATGATGGCCGTGGGAACCCCCCTTG  
 15 GTT-AGTAACACCACTGCTGCTTCGTAGCGGAGCATGACGGCCGTGGGAACCTCCTCCTTG  
 21 GTT-AGTAACACCACTGCTGCTTCGTAGCGGAGCATGACGGCCGTGGGAACCTCCTCCTTG  
 20 GTT-AGTAACAGCACTGTTGCTTCGTAGCGGAGCATGGTGGCCGTGGGAACCTCCTCCTTG  
 27 GTT-AGTAGCAGCACTGTCGTCTCGTAGCGGAGCATGATGGCCGTGGGAACCTCCTCCTTG  
 16 GTT-AGTAACACCACTGCTGCTTCGTAGCGGAGCATGACGGCCGTGGGAACCTCCTCCTTG  
 17 GTT-AGTAACACCACTGCTGCTTCGTAGCGGAGCATGACGGCCGTGGGAACCTCCTCCTTG  
 79 GTT-AGTAACACCACTGCTACTTCGTAGCGGAGCATGACGGCCGTGGGAACCTCCTCCTTG  
 32 GTT-AGTAACACCACTGCTACTTCGTAGCGGAGCATGACGGCCGTGGGAACCCCTCCTTG  
 33 GTT-AGTAACACCACTGCTACTTCGTAGCGGAGCATGACGGCCGTGGGAACCTCCTCCTTG  
 37 GTT-AGTAACAACACTGCTGCTTCGTAGCGGAGCATGACGGCCGTGGGAACCCCTCCTTG  
 25 GTC-AGTAACAACACTGCTGCTTCGTAGCGGAGCATGACGGCCGTGGGAACCTCCTCCTTG  
 26 GTT-AGTAACACCACTGCTGCTTCGTAGCGGAGCATGACGGCCGTGGGAACCTCCTCCTTG  
 38 GTC-AGTAATAGCACTGTTGCTTCGTAGCGGAGCATGACGGCCGTGGGAACCTCCTCCTTG  
 28 GTT-AGTAACAGCACTGTTGTTTCGTAGCGGAGCATGATGGCCGTGGGAACCTCCTCCTTG  
 34 GTT-AGTAACAGCACTGTTGTTTCGTAGCGGAGCATGATGGCCGTGGGAACCTCCTCCTTG  
 29 GTT-AGTAACAGCACCGTTGCTTCGTAGCGGAGCATGATGGCCGTGGGAACCTCCTCCTTG  
 39 GCT-AGTAACAGCACTGTCGTCTCGTAGCGGAGCATGATGGCCGTGGGAACCTCCTCCTTG  
 40 GCT-AGTAACAGCACTGTTGCTTCGTAGCGGAGCATGGTGGCCGCGGGAACTCCTCCTTG  
 58 GCT-AGTAACAGCACTGTTGCTTCGTAGCGGAGCATGGTGGCCGCGGGAAACCCCTTG  
 59 GTT-AGTAACAGCACTGTTGCTTCGTAGCGGAACATGGCCGCGGGAACTCCTCCTTG  
 81 GTT-AGTAGTAGCACTGTTGCTTCGTAGCGGAGCATGATGGCCGTGGGAGCTCCCTCCTTG  
 82 GTT-AGTAGTAGCACTGTTGCTTCGTAGCGGAGCATGATGGCCGTGGGAACCTCCTCCTTG  
 83 GTT-AGTAGCGTACTGCTGTCTCGTAGCGGAGCATGTTGGCCGTGGGACCTCCTCCTTG  
 84 GTT-AGTAACAGCACTGTTGCTTCGTAGCGGAGCATGATGGCCGTGGGACCTCCTCCTTG  
 130 GCG-AGTAACAGCACTGTTGTTTCGTAGCGGAGCATGATGGCCGTGGGACCCCTCCTTG  
 131 GCA-AGTAACAGCACTGTTGTTTCGTAGCGGAGCATGATGGCCGTGGGAACCTCCTCCTTG  
 51 GTT-AGTAGCAGCACTGTTGCTTCGTAGCGGAGCATGATGGCTGTGGGAACCTCCTCCTTG  
 52 GTT-AGTAGCAGCACTGTTGCTTCGTAGCGGAGCATGATGGCTGTGGGAACCTCCTCCTTG  
 53 GTT-AGTAACAGCACTGGTGTTCGTAGCGGAGCATGGTGGCCGTGGGAACCTCCTCCTTG  
 67 GCT-AGTAGCAGCACTGTTGTCTCGTAGCGGAGCATGATGGCCGTGGGAACCTCCTCCTTG  
 66 GTT-AGTAACAGCACTGTTGCTTCGTAGCGGAGCATGATGGCTGTGGGAATCCCTCCTTG  
 107 GCT-AGTAACAGCACTGTTGCTTCGTAGCGGAGCATGGTGGCCGCGGGAAACCTCCTCCTTG  
 105 GCT-AGTAACAGCACTGTTGCTTCGTAGCGGAGCATGGTGGCCGCGGGAACTCCTCCTTG  
 106 GCT-AGTAACAGCACTGTTGCTTCGTAGCGGAGCATGGTGGCCGCGGGAACTCCTCCTTG  
 65 GTT-AGTAACAGCACTGTTGCTTCGTAGCGGAGCATGATGGCCGTGGGAACCTCCTCCTTG  
 41 GTT-AGTAACAGCACTGTTGCTTCGTAGCGGAGCATGATGGCTGTGGGAACCTCCTCCTTG  
 43 GTT-AGTAGCGCACTGCTGTCTCGTAGCGGAGCATGTTGGCCGTGGGAACCTCCTCCTTG  
 98 GTT-AGTAGCGTACTGCTGTCTCGTAGCGGAGCATGTTGGCCGTGGGAACCTCCTCCTTG  
 44 GTT-AGTAGCGCACTGCTGTCTCGTAGCGGAGCATGTTGGCCGTGGGAAGCCCTCCTTG  
 108 GTT-AGTAGCGTACTGCTGTCTCGTAGCGGAGCATGTTGGCCGTGGGAACCTCCTCCTTG  
 109 GTT-AGTAGCGTACTGCTGTCTCGTAGCGGAGCATGTTGGCCGTGGGAACCTCCTCCTTG  
 68 GTT-AGTAGCGTACTGCTGTCTCGTAGCGGAGCATGTTGGCCGTGGGAACCTCCTCCTTG  
 54 GTT-AGTAGCGTACTGCTGTCTCGTAGCGGAGCATGTTGGCCGTGGGAACCTCCTCCTTG  
 56 GTT-AGTAGCGTACTGCTGTCTCGTAGCGGAGCATGTTGGCCGTGGGAACCTCCTCCTTG  
 74 GTT-AGTAGCGTACTGCTGTCTCGTAGCGGAGCATGTTGGCCGTGGGAACCTCCTCCTTG  
 55 GTT-AGTAGCGTACTGCTGTCTCGTAGCGGAGCATGTTGGCCGTGGGAACCTCCTCCTTG  
 57 GTT-AGTAGCGTACTGCTGTCTCGTAGCGGAGCATGTTGGCCGTGGGAACCTCCTCCTTG  
 80 GTT-AGTAGCGTACTGCTGTCTCGTAGCGGAGCATGTTGGCCGTGGGAACCTCCTCCTTG  
 72 GTT-AGTAGCGTACTGCTGTCTCGTAGCGGAGCATGTTGGCCGTGGGAACCTCCTCCTTG  
 110 GTT-AGTAGCGTACTGCTGTCTCGTAGCGGAGCATGTTGGCCGTGGGAACCTCCTCCTTG  
 73 GTT-AGTAGCGTACTGCTGTCTCGTAGCGGAGCATGTTGGCCGTGGGAACCTCCTCCTTG  
 69 GTT-AGTAGCGTACTGCTGTCTCGTAGCGGAGCATGTTGGCCGTGGGAACCTCCTCCTTG



70 GTT-AGTAGCGGTACTGCTGTCTCGTAGCGGAGCATGTTGGCCGTGGGAACACCTCCTTG  
71 GTT-AGTAGCGGTACTGCTGTCTCGTAGCGGAGCATGTTGGCCGTGGGAACACCTCCTTG  
111 GTT-AGTAGCGGTACTGCTGTCTCGTAGCGGAGCATGTTGGCCGTGGGAACACCTCCTTG  
112 GTT-AGTAGCGGTACTGCTGTCTCGTAGCGGAGCATGTTGGCCGTGGGAACACCTCCTTG  
113 GTT-AGTAGCGGTACTGCTGTCTCGTAGCGGAGCATGTTGGCCGTGGGAACACCTCCTTG  
76 GTT-AGTAGCGGTACTGCTGTCTCGTAGCGGAGCATGTTGGCCGTGGGAACACCTCCTTG  
77 GTT-AGTAGCGGTACTGCTGTCTCGTAGCGGAGCATGTTGGCCGTGGGAACACCTCCTTG  
75 GTT-AGTAGCGGTACTGCTGTCTCGTAGCGGAGCATGTTGGCCGTGGGAACACCTCCTTG  
114 GTT-AGTAGCGGTACTGCTGTCTCGTAGCGGAGCATGTTGGCCGTGGGAACACCTCCTTG  
78 GTT-AGTAGCGGTACTGCTGTCTCGTAGCGGAGCATGTTGGCCGTGGGAACACCTCCTTG  
115 GTT-AGTAGCGGTACTGCTGTCTCGTAGCGGAGCATGTTGGCCGTGGGAACACCTCCTTG  
116 GTT-AGTAGCGGTACTGCTGTCTCGTAGCGGAGCATGTTGGCCGTGGGAACACCTCCTTG  
60 GCT-AGTAGCAGCACTGTTGCTTCGTAGCGGAGCATGATGGCCGTGGGAACCTCCTCCTTG  
216 GTT-AGTAGCGGCACTGTTGCTTCGTAGCGGAGCATGTTGGCCGTGGGAACCTCCTCCTTG  
166 GTT-AGTAACAGCACTGTTGTTTCGTAGCGGAGCATGATGGCCGTGGGAACCTCCTCCTTG  
215 CTT-AGTAACAGCACTGTTGTTTCGTAGCGGAGCATGATGGCCGTGGGAACCTCCTCCTTG  
103 GTT-AGTAGCAGCACTGTTGCTTCGTAGCGGAGCATGATGGCCGTGGGAATTCCTCCTTG  
42 GTT-AGTAACAGCACTGTTGTTTCGTAGCGGAGCATGATGGCCGTGGGAACACCTCCTTG  
46 GTT-AGTAACAGCACTGTTGCTTCGTAGCGGAGCATGGTGGCCGTGGGAATCCCTCCTTG  
47 GTT-AGTAACAGCACTGTTGCTTCGTAGCGGAGCATAGTGGCCGTGGGAATCCCTCCTTG  
45 GTG-AGTAGCAGCACTGTTGCTTCGTAGCGGAGCATGGTGGCCGTGGGAACCTCCTCCTTG  
62 GTT-AGTAACAGCACTGTTGCTTCGTAGCGGAGCATGAAGGCCGTGGGAATCCCTCCTTG  
86 GTT-AGTAACAGCACTGTTGCTTCGTAGCGGAGCATGATGGCCGTGGGAACCTCCTCCTTG  
88 GTT-AGTAACAGCACTGTTGCTTCGTAGCGGAGCATGGTGGCCGTGGGAACCTCCTCCTTG  
87 GTT-AGTAACAGCACTGTTGCTTCGTAGCGGAGCATGATGGCCGTGGGAATTCCTCCTTG  
135 GCG-AGTAACAGCACTGTTGTTTCGTAGCGGAGCATGATGGCCGTGGGAACACCTCCTTG  
85 GTT-AGTAACAGCACTGTTGCTTCGTAGCGGAGCATGATGGCCGTGGGAACCTCCTCCTTG  
134 GTT-AGTAACAGCACTATTGCTTCGTAGCGGAGCATGATGGCCGTGGGAATCCCTCCTTG  
117 GTG-AGTAACAGCACTGTTGTTTCGTAGCGGAGCATGATGGCCGTGGGAACACCTCCTTG  
118 GTT-AGTAACAGCACTGTTGCTTCGTAGCGGAGCATGGTGGCCGTGGGAACACCTCCTTG  
199 GTT-AGTAACAGCACTGTTGTTTCGTAGCGGAGCATGGTGGCCGTGGGAACACCTCCTTG  
200 GTT-AGTAACAGCACTGTTGTTTCGTAGCGGAGCATGGTGGCCGTGGGAACACCTCCTTG  
119 GTT-AGTAACAGCACTGTTGCTTCGTAGCGGAGCATGGTGGCCGTGGGAACACCTCCTTG  
198 GTT-AGTAACAGCACTGTTGTTTCGTAGCGGAGCATGATGGCCGTGGGAACACCTCCTTG  
207 GCG-AGTAACAGCACTGTTGTTTCGTAGCGGAGCATGATGGCCGTGGGAACACCTCCTTG  
219 GCG-AGTAACAGCACTGTCGCTTCGTAGCGGAGCATGTTGGCCGTGGGAATCCCTCCTTG  
206 GTG-AGTAACAGCACTGTTGTTTCGTAGCGGAGCATGATGGCCGTGGGAACACCTCCTTG  
121 GTT-AGTAACAGCACTGTTGTTTCGTAGCGGAGCATGGTGGCCGTGGGAACACCTCCTTG  
201 GTT-AGTAACAGCACTGTTGTTTCGTAGCGGAGCATGGTGGCCGTGGGAACACCTCCTTG  
122 GTT-AGTAACAGCACTGTTGTTTCGTAGCGGAGCATGGTGGCCGTGGGAACACCTCCTTG  
120 GTT-AGTAACAGCACTGTTGCTTCGTAGCGGAGCATGGTGGCCGTGGGAACACCTCCTTG  
202 GTT-AGTAACAGCACTGTTGTTTCGTAGCGGAGCATGGTGGCCGTGGGAACACCTCCTTG  
203 GTT-AGTAACAGCACTGTTGTTTCGTAGCGGAGCATGGTGGCCGTGGGAACACCTCCTTG  
171 GTT-AGTAACAGCACTGTTGTTTCGTAGCGGAGCATGGTGGCCGTGGGAACACCTCCTTG  
172 GTT-AGTAACAGCACTGTTGTTTCGTAGCGGAGCATGGTGGCCGTGGGAACACCTCCTTG  
123 GTT-AGTAACAGCACTGTTGTTTCGTAGCGGAGCATGATGGCCGTGGGAACACCTCCTTG  
124 GTT-AGTAACAGCACTGTTGCTTCGTAGCGGAGCATGGTGGCCGTGGGAATCCCTCCTTG  
128 GTT-AGTAACAGCACTGTTGTTTCGTAGCGGAGCATGATGGCCGTGGGAATCCCTCCTTG  
129 GTT-AGTAGTAGCACTGTTGCTTCGTAGCGGAGCATGATGGCCGTGGGAACACCTCCTTG  
177 GTT-AGTAGCAGCACTGTTGCTTCGTAGCGGAGCATGGTGGCCGTGGGAACACCTCCTTG  
209 GTT-AGTAGCAGCACTGTTGCTTCGTAGCGGAGCATGGTGGCCGTGGGAACACCTCCTTG  
178 GTT-AGTAGCAGCACTGTTGCTTCGTAGCGGAGCATGGTGGCCGTGGGAACACCTCCTTG  
208 GTT-AGTAGCAGCACTGTTGCTTCGTAGCGGAGCATGGTGGCCGTGGGAACACCTCCTTG  
136 GTT-AGTAGTGACACTGTTGCTTCGTAGCGGAGCATGATGGCCGTGGGAACCTCCTCCTTG  
264 GTT-AGTAGTGACACTGTTGCTTCGTAGCGGAGCATGATGGCCGTGGGAACCTCCTCCTTG  
89 GTT-AGTAACAGCACTGTTGCTTCGTAGCGGAGCATGGTGGCCGTGGGAATCCCTCCTTG  
95 GTT-AGTAGTAGTACTGTTGCTTCGTAGCGGAGCATGACGGCCGTGGGAATCCATCCTTG  
158 GTT-AGTAGTAGTACTGTTGCTTCGTAGCGGAGCATGACGGCCGTGGGAACACCTCCTTG  
211 GTT-AGTAGTGTATTGTTGCTTCGTAGCGGAGCATGGTGGCCGTGGGAATCCCTCCTTG  
147 GTT-AGTAGTAGTACTGTTGCTTCGTAGCGGAGCATGACGGCCGTGGGAACCTCCTCCTTG  
163 GTT-AGTAGTAGTACTGTTGCTTCGTAGCGGAGCATGACGGCCGTGGGAACCTCCTCCTTG  
96 GTT-AGTAGTAGTACTGTTGCTTCGTAGCGGAGCATGACGGCCGTGGGAACCTCCTCCTTG

159 GTT-AGTAGTAGCACTGTTGCTTCGTAGCGGAGCATGATGGCCGTGGGAACCTCCTCTTG  
137 GTG-AGTAACAGCACTGTTGTTTCGTAGCGGAGCATGATGGCCGTGGGAACCTCCTCTTG  
176 GTT-AGTAACAGCACTGTTGTTTCGTAGCGGAGCATGATGGCCGTGGGAACCCCTCCTTG  
138 GTG-AGTAACAGCACTGTTGTTTCGTAGCGGAGCATGATGGCCGTGGGAACCTCCTCTTG  
140 GCT-AGTAACAGCACTGTTGCTTCGTAGCGGAGCATGGTGGCCGCGGGAACCTCCTCTTG  
149 GCT-AGTAACAGCACTGTTGCTTCGTAGCGGAGCATGGTGGCCGCGGGAACCTCCTCTTG  
188 GCT-AGTAACAGCACTGTTGCTTCGTAGCGGAGCATGGTGGCCGCGGGAACCTCCTCTTG  
139 GCT-AGTAACAGCACTGTTGCTTCGTAGCGGAGCATGGTGGCCGCGGGAACCTCCTCTTG  
187 GCT-AGTAACAGCACTGTTGCTTCGTAGCGGAGCATGGTGGCCGCGGGAACCTCCTCTTG  
186 GTG-AGTAGCAGCACTGTTGCTTCGTAGCGGAGCATGGTGGCCGTGGGAACCTCCTCTTG  
184 GTT-AGTAACAACACTGTAGCTTCGTAGCGGAGCAGATGGCCGTGGGAACCCCTCTTG  
185 GTG-AGTAGCAGCACTGTTGCTTCGTAGCGGAGCATGGTGGCCGTGGGAACCCCTCTTG  
97 GTT-AGTAACAGCACTGTTGCTTCGTAGCGGAGCATGGTGGCCGCGGGAACACCTCTTG  
164 GCT-AGTAACAGCACTGTTGCTTCGTAGCGGAGCATGGTGGCCGCGGGAACCTCCTCTTG  
165 GTT-AGTAACAGCACTGTTGTTTCGTAGCGGAGCATGATGGCCGCGGGAACCTCCTCTTG  
90 GTT-AGTAACAGCACTGTTGCTTCGTAGCGGAGCATGATGGCCGTGGGAATCCCTCCTTG  
91 GTT-AGTAACAGCACTGTTGTTTCGTAGCGGAGCATGATGGCCGTGGGAATCCCTCCTTG  
243 GCT-AGTAACAGCACTGTTGCTTCGTAGCGGAGCATGATGGCCGTGGGAATCCCTCCTTG  
242 GCT-AGTAACAGCACTGTTGCTTCGTAGCGGAGCATGGTGGCCGCGGGAATCCCTCCTTG  
252 GTT-AGTAGTAGCACTGTTGCTTCGTAGCGGAGCATGATGGCCGCGGGAATCCCTCCTTG  
194 GTT-AGTAACAGCACTGTTGCTTCGTAGCGGAGCATGGTGGCCGCGGGAATCCCTCCTTG  
195 GTT-AGTAACAGCACTGTTGCTTCGTAGCGGAGCATGATGGCCGTGGGAATCCCTCCTTG  
169 GCT-AGTAACAGCACTGTTGCTTCGTAGCGGAGCATGGTGGCCGCGGGAACCTCCTCTTG  
170 GTT-AGTAACAGCACTGTTGTTTCGTAGCGGAGCATGATGGCCGCGGGAACCCCTCCTTG  
196 GTT-AGTAACAGCACTGTTGCTTCGTAGCGGAGCATGATGGCCGCGGGAACCCCTCCTTG  
197 GTT-AGTAACAGCACTGTTGTTTCGTAGCGGAGCATGATGGCCGCGGGAACCTCCTCTTG  
231 GTT-AGTAACAGCACTGTTGCTTCGTAGCGGAGCATGACGGCCGCGGGAACCTCCTCTTG  
232 GTT-AGTAACAACACTGTTGTTTCGTAGCGGAGCATGATGGCCGCGGGAACCTCCTCTTG  
230 GTT-AGTAACAGCACTGTTGCTTCGTAGCGGAGCATGGTGGCCGTGGGAATCCCTCCTTG  
233 GTT-AGTAACAGCACTGTTGTTTCGTAGCGGAGCATGATGGCCGCGGGAACCCCTCCTTG  
234 GTT-AGTAACAGCACTGTTGCTTCGTAGCGGAGCATGGTGGCCGTGGGAACCCCTCCTTG  
235 GTT-AGTAACAGCACTGTTGCTTCGTAGCGGAGCATGGTGGCCGTGGGAACCCCTCCTTG  
229 GTT-AGTAACAGCACTGATGCTTCGTAGCGGAGCATGGTGGCCGCGGGAACCCCTCCTTG  
265 GTT-AGTAGTAGCACTGTTGCTTCGTAGCGGAGCATGATGGCCGTGGGAATCCCTCCTTG  
282 GTT-AGTAGCAGCACTGTTGCTTCGTAGCGGAGCATGATGGCCGCGGGAATCCCTCCTTG  
256 GTT-AGTAGCAACACTGTTGTTTCGTAGCGGAGCATGATGGCCGTGGGAACCCCTCCTTG  
49 GTT-AGTAGCAGCACTGTTGCTTCGTAGCGGAGCATGATGGCTGTGGGAACCTCCTCTTG  
50 GTT-AGTAGCAGCACTGTTGCTTCGTAGCGGAGCATGATGGCTGTGGGAACCTCCTCTTG  
48 GTT-AGTAACAGCACTGTTGCTTCGTAGCGGAGCATGATGGCCGTGGGAACCTCCTCTTG  
63 GTT-AGTAACAGCACTGTTGTTTCGTAGCGGAGCATGATGGCCGCGGGAACCTCCTCTTG  
104 GTT-AGTAGCAGCACTGTTGCTTCGTAGCGGAGCATGATGGCCGTGGGAACCTCCTCTTG  
93 GTT-AGTAACAGCACTGTTGCTTCGTAGCGGAGCATGATGGCCGTGGGAACCTCCTCTTG  
94 GCT-AGTAACAGCACTGTTGCTTCGTAGCGGAGCATGGTGGCCGCGGGAATCCCTCCTTG  
92 GTT-AGTAACAGCACTGTTGCTTCGTAGCGGAGCATGATGGCCGTGGGAACCCCTCCTTG  
167 GCT-AGTAACAGCACTGTTGCTTCGTAGCGGAGCATGGTGGCCGCGGGAACCTCCTCTTG  
168 GCT-AGTAACAGCACTGTTGCTTCGTAGCGGAGCATGGTGGCCGCGGGAACCTCCTCTTG  
64 GCT-AGTAACAGCACTGTTGCTTCGTAGCGGAGCATGGTGGCCGCGGGAACCTCCTCTTG  
181 ACT-AGTAACAGCACTGTTGCTTCGTAGCGGAGCATGGTGGCCGCGGGAACCTCCTCTTG  
141 GCT-AGTAACAGCACTGTTGCTTCGTAGCGGAGCATGGTGGCCGCGGGAACCTCCTCTTG  
152 GCT-AGTAACAGCACTGTTGCTTCGTAGCGGAGCATGGTGGCCGCGGGAACCTCCTCTTG  
144 GCT-AGTAACAGCACTGTTGCTTCGTAGCGGAGCATGGTGGCCGCGGGAACCTCCTCTTG  
150 GCT-AGTAACAGCACTGTTGCTTCGTAGCGGAGCATGGTGGCCGCGGGAACCTCCTCTTG  
151 GCT-AGTAACAGCACTGTTGCTTCGTAGCGGAGCATGGTGGCCGCGGGAACCTCCTCTTG  
145 GCT-AGTAACAGCACTGTTGCTTCGTAGCGGAGCATGGTGGCCGCGGGAACCTCCTCTTG  
156 GCT-AGTAACAGCACTGTTGCTTCGTAGCGGAGCATGGTGGCCGCGGGAACCTCCTCTTG  
148 GCT-AGTAACAGCACTGTTGCTTCGTAGCGGAGCATGGTGGCCGCGGGAACCTCCTCTTG  
143 GCT-AGTAACAGCACTGTTGCTTCGTAGCGGAGCATGGTGGCCGCGGGAACCTCCTCTTG  
155 GCT-AGTAACAGCACTGTTGCTTCGTAGCGGAGCATGGTGGCCGCGGGAACCTCCTCTTG  
154 GCT-AGTAACAGCACTGTTGCTTCGTAGCGGAGCATGGTGGCCGCGGGAACCTCCTCTTG  
189 GCT-AGTAACAGCACTGTTGCTTCGTAGCGGAGCATGGTGGCCGCGGGAACCTCCTCTTG  
142 GCT-AGTAACAGCACTGTTGCTTCGTAGCGGAGCATGGTGGCCGCGGGAACCTCCTCTTG  
153 GCT-AGTAACAGCACTGTTGCTTCGTAGCGGAGCATGGTGGCCGCGGGAACCTCCTCTTG

190 GCT-AGTAACAGCACTGTTGCTTCGTAGCGGAGCATGGTGGCCGCGGGAACCTCCTTTG  
99 GCT-AGTAACAGCACTGTTGCTTCGTAGCGGAGCATGGTGGCCGCGGGAACCTCCTTTG  
191 GCT-AGTAACAGCACTGTTGCTTCGTAGCGGAGCATGGTGGCCGCGGGAACCTCCTTTG  
192 GCT-AGTAACAGCACTGTTGCTTCGTAGCGGAGCATGGTGGCCGCGGGAACCTCCTTTG  
160 GCT-AGTAACAGCACTGTTGCTTCGTAGCGGAGCATGGTGGCCGCGGGAACCTCCTTTG  
180 GCT-AGTAACAGCACTGTTGCTTCGTAGCGGAGCATGGTGGCCGCGGGAACCTCCTTTG  
213 GCT-AGTAACAGCACTGTTGCTTCGTAGCGGAGCATGGTGGCCGCGGGAACCTCCTTTG  
100 GCT-AGTAACAGCACTGTTGCTTCGTAGCGGAGCATGGTGGCCGCGGGAACCTCCTTTG  
101 GCT-AGTAACAGCACTGTTGCTTCGTAGCGGAGCATGGTGGCCGCGGGAACCTCCTTTG  
146 GCT-AGTAACAGCACTGTTGCTTCGTAGCGGAGCATGGTGGCCGCGGGAACCTCCTTTG  
157 GCT-AGTAACAGCACTGTTGCTTCGTAGCGGAGCATGGTGGCCGCGGGAACCTCCTTTG  
162 GCT-AGTAACAGCACTGTTGCTTCGTAGCGGAGCATGGTGGCCGCGGGAACCTCCTTTG  
182 ACT-AGTAACAGCACTGTTGCTTCGTAGCGGAGCATGGTGGCCGCGGGAACCTCCTTTG  
183 GTT-AGTAACAGCACTGTTGCTTCGTAGCGGAGCATGATGGCTGCGGGAACCTCCTTTG  
102 ATC-AGTAACAGCACTGATGCTTCGTAGCGGAGCATGGCGGCGTGGGAACCTCCTTTG  
161 GCT-AGTAACAGCACTGTTGCTTCGTAGCGGAGCATGGTGGCCGCGGGAACCTCCTTTG  
193 GCT-AGTAACAGCACTGTTGCTTCGTAGCGGAGCATGGTGGCCGCGGGAACCTCCTTTG  
227 GCT-AGTAACAGCACTGCTGCTTCGTAGCGGAGCATGGTGGCCGCGGGAACCTCCTTTG  
254 GCT-AGTAACAGCACTGCTGCTTCGTAGCGGAGCATGGTGGCCGCGGGAACCTCCTTTG  
214 GCT-AGTAACAGCACTGTTGCTTCGTAGCGGAGCATGGTGGCCGCGGGAACCTCCTTTG  
179 GTT-AGTAGCAGCACTGTTGCTTCGTAGCGGAGCATGATGGCCGTGGGAACCTCCTTTG  
212 GCT-AGTAACAGCACTGTTGCTTCGTAGCGGAGCATGATGGCCGTGGGAACCTCCTTTG  
241 GTT-AGTAGTAGTACTGTTGCTTCGTAGCGGAGCATGGTGGCCGTGGGAACCTCCTTTG  
210 GTT-AGTAGTAGCACTGTTGCTTCGTAGCGGAGCATGACGGCCGTGGGAACCTCCTTTG  
223 GCT-AGTAGTAGCACTGTTGCTTCGTAGCGGAGCATGGTGGCCGTGGGAACCTCCTTTG  
239 GTT-AGTAGTAGTGTGTTGCTTCGTAGCGGAGCATGACGGCCGTGGGAACCTCCTTTG  
262 GCT-AGTAGTAGTACTGCTGTTTCGTAGCGGAACACGACGGCCGTGGGAACCTCCTTTG  
240 GTT-AGTAGTAGTACTGTTGCTTCGTAGCGGAGCATGGTGGCCGTGGGAACCTCCTTTG  
284 GTC-AGTAGTAGCACTGTTGCTTCGTAGCGGAACATGATGGCCGTGGGATTCCTCCTTTG  
251 GTT-AGTAGTAGTACTGTTGCTTCGTAGCGGAGCATGGTGGCCGTGGGAGTCCCTCCTTTG  
263 GTT-AGTAGTAGTACTGTTGCTTCGTAGCGGAGCATGGTGGCCGTGGGAA-CCCCCTTTG  
250 GTT-AGTAGTAGTACTGTTGCTTCGTAGCGGAGCATGGTGGCCGTGGGAA-CCCTCCTTTG  
224 GCT-AGTAGTAGCACTGTTGCTTCGTAGCGGAGCATGGTGGCCGTGGGAACCTCCTTTG  
237 GCG-AGTAACAGCACTGTTGCTTCGTAGCGGAGCATGGTGGCCGTGGGAACCTCCTTTG  
281 GTG-AGTAACAGCACTGTTGCTTCGTAGCGGAGCATGTTGGCCGTGGGAACCTCCTTTG  
221 GCG-AGTAACAGCACTGTTGCTTCGTAGCGGAGCATGTTGGCCGTGGGAACCTCCTTTG  
226 GCG-AGTAACAGCACTGTTGTTTCGTAGCGGAGCATGATGGCCGTGGGAAATTCCTCCTTTG  
253 GCG-AGTAACAGCACTGTTGCTTCGTAGCGGAGCATGTTGGCCGTGGGAAATTCCTCCTTTG  
286 GTT-AGTAGCAGCACTGTTGTTTCGTAGCGGAGCATGGTGGCCGTGGGAACCTCCTTTG  
279 GTT-AGTAGCTGTATTGTTGCTTCGTAGCGGAGCATGATGGCCGTGGGAACCTCCTTTG  
287 GTT-AGTAGCTGTATTGTTGCTTCGTAGCGGAGCATGATGGCCGTGGGAACCTCCTTTG  
267 GTT-AGTAGCTGTATTGTTGCTTCGTAGCGGAGCATGATGGCCGTGGGAATTCCTCCTTTG  
291 GTT-AGTAACAGCACTGTTGCTTCGTAGCGGAGCATGATGGCCGCGGGAACCTCCTTTG  
301 GTT-AGTAGTACTGTTGTTTCGTAGCGGAGCATGATGGCCGCGGGAACCTCCTTTG  
269 GCT-AGTAGTGGTACCGTGTTCGTAGCGGAGCATGGTGGCCGTGGGAACCTCCTTTG  
289 GCT-AGTAGTGGTACCGTGTTCGTAGCGGAGCATGGTGGCCGTGGGAACCTCCTTTG  
302 ACT-AGTAGTGGTACCGTGTTCGTAGCGGAGCATAGTGGCCGCGGGAACCTCCTTTG  
274 GTT-AGTAGCAGCACTGTTGTTTCGTAGCGGAGCATGGTGGCCGTGGGAACCTCCTTTG  
275 GTT-AGTAGCAGCACTGTTGTTTCGTAGCGGAGCATGGTGGCCGTGGGAACCTCCTTTG  
297 GCT-AGTAGTGGTACTGTTGTTTCGTAGCGGAGCATGGTGGCCGTGGGAACCTCCTTTG  
304 GTT-AGTAGTAGTACTGTTGCTTCGTAGCGGAGCATGGTGGCCGTGGGAACCTCCTTTG  
270 GTT-AGTAGCAACTGTTGTTTCGTAGCGGAGCATGATGGCCGTGGGAACCTCCTTTG  
298 GTT-AGTAGCAGCACTGTTGCTTCGTAGCGGAGCATGATGGCTGTGGGAACCTCCTTTG  
283 GTT-AGTAACAGCACTGTTGCTTCGTAGCGGAGCATGATGGCCGCGGGAACCTCCTTTG  
300 GTG-AGTAGCAGCACTGTCGCTTCGTAGCGGAGCATGGTGGCCGCGGGAACCTCCTTTG  
271 GTT-AGTAGTAGCACTGTTGCTTCGTAGCGGAGCATGGTGGCCGTGGGAACCTCCTTTG  
272 GTT-AGTAGTAGTATTGTTGTTTCGTAGCGGAGCATGGTGGCCGTGGGAACCTCCTTTG  
273 GTT-AGTAGTAGTACTGTTGCTTCGTAGCGGAGCATGGTGGCCGTGGGAACCTCCTTTG  
285 GTT-AGTAGTAGTACTGTTGCTTCGTAGCGGAGCATGGTGGCCGTGGGAACCTCCTTTG  
303 GTC-AGTAGCAGCACTGTTGTTTCGTAGCGGAGCATGGTGGCCGTGGGAACCTCCTTTG  
309 GTT-AGTAGCAGCACTGTTGTTTCGTAGCGGAGCATGGTGGCCGTGGGAATTCCTCCTTTG  
312 GCT-AGTAGTGGCAATGTTGTTTCGTAGCGGAGCATGTTGGCCGTGGGAACCTCCTTTG

313 GCT-AGTAGTGGCAATGTTGTTTCGTAGCGGAGCATGTTGGCCGTGGGAATCCCTCCTTG  
 316 GCT-AGTAATGACTTTGTTGCTTCGTAGCGGAGCATGCAAGCCACGGGACCTCCCCCATG  
 318 GCT-AGTAATGACTTTGTTGCTTCGTAGCGGAGCATGCAAGCCGTGGGAACCTCCCTTG  
 314 GCT-AGTAGTGGCAATGTTGTTTCGTAGCGGAGCATGTTGGCCGTGGGAACCTCCCTTG  
 315 GCT-AGTAATGGCTTTGTTGCTTCGTAGCGGAGCATGCAAGCCGCGGGAACTCCTCCTTG  
 317 GTT-AGTAACACTCATTGTTGCTTCGTAGCGGAGCACAATGAGCGGTGGGAACCCCTCCCTG  
  
 310 GTAACAAGGACCCACGGGGCCGAAAGCCACGTCTTCC-AGA-CCCAACATGTGTGCAACC  
 311 GCGACAAGGACCCACGGGGCCGAAAGCCACGTCTTT---GA-CCCAACATGTGTGCAACC  
 307 GTAACAAGGACCCACGGGGCCAAAAGCCACGTCTAGACAGA-CCCACCATGTGTGCAACC  
 308 GAGACAAGGACCCGCGGGGCCAAAAGCCACGTCCGGACGGA-CCCACCATGTGTGCAACC  
 306 GTAACAAGGACCCGCGGGGCCGAAAGCCACGTCT---TTGA-CCCACATGTGTGCAACC  
 276 GTGACAGGGACCCACGGG-CCGAAAGCCACGTCTAACGGA-CCCACCATGTGTGCAACC  
 277 GTGACAGGGACCCACGGGGCCGAAAGCCACGTCTAACGGA-CCCATTATGTGTGCAACC  
 278 GTAACAAGGACCCACGGGGCCGAAAGCCACGTCTAACGGA-CCCATTATGTGTGCAACC  
 288 GTGACAAGGACCCACGGGGCCGAAAGCCACGTCTGACGGA-CCCACCATGTGTGCAACC  
 305 GTGACAAGGACCCACGGGGCCAAAAGCCACGTCCGGACGGA-CCCACCATGTGTGCAACC  
 290 GTGACAAGGACCTGCGGGGCCGAAAGCCACGTCTAATGGA-CCCATTATGTGTGCAACC  
 292 GTAACAAGGACCCACGGGGCCGAAAGCCACGTCTT---GGA-CCCACCATGTGTGCAACC  
 244 GTGACAAGGACCCGCGGGGCCGAAAGCCACGTCTAACGGA-CCCATCATGTGTGCAACC  
 257 GTGACAAGGACCTGCGGGGCCGAAAGCCACGTCTAACGGA-CCCACCATGTGTGCAACC  
 299 GTGACAAGGACCCACGGGGCCGAAAGCCACGTCTAACGGA-CCCACCATGTGTGCAACC  
 245 GTAACAAGGACCCACGGGGCCGAAAGCCACGTCCAACGGA-CCCATCATGTGTGCAACC  
 258 GTGACAAGGACCCACGGGGCCGAAAGCCACGTCTAACGGA-CCCACCATGTGTGCAACC  
 236 GTAACAAGGACCCACGGGGCCGAAAGCCACGTCTAACGGA-CCCATCATGTGTGCAACC  
 246 GTGACAAGGACCCGCGGGGCCGAAAGCCACGTCT-ACGGA-CCCATCATGTGTGCAACC  
 259 GTGACAAGGACCCGCGGGGCCGAAAGCCACGTCT-ACGGA-CCCATCATGTGTGCAACC  
 268 GTGACAAGGACCCACGGGGCCGAAAGCCACGTCTGACGGA-CCCATCATGTGTGCAACC  
 280 GTAACAAGGCCCACGGGGCCGAAAGCCACGTCTAACGGA-CCCATCATGCGTGAACC  
 247 GTGACAAGGACCCGCGGGGCCGAAAGCCACGTCT-ACGGA-CCCATCATGTGTGCAACC  
 220 GTAACAAGGACCCACGGGGCCGAAAGCCACGTCTAACGGA-CCCATCATGTGTGCAACC  
 222 GTAACAAGGACCCACGGGGCCGAAAGCCACGTCTAACGGA-CCCACCATGTGTGCAACC  
 238 GTAACAAGGACCCACGGGGCCGAAAGCCACGTCTGTCGGA-CCCACCATGTGTGCAACC  
 248 GTGACAAGGACCCGCGGGGCCGAAAGCCACGTCTA-CGGA-CCCACCATGTGTGCAACC  
 261 GTAACAAGGACCCGCGGGGCCAAAAGCCACGTCT---CTGA-CCCACCATGTGTGCAACC  
 249 GTAACAAGGACCCACGGGGCCGAAAGCCACGTCTC---AGGA-CCCACCATGTGTGCAACC  
 293 GTAACAAGGACCCACGGGGCCGAAAGCCACGTCTTG---GA-CCCACCATGTGTGCAACC  
 294 GTAACAAGGACCCACGGGGCCGAAAGCCACGTCTTG---GA-CCCACCATGTGTGCAACC  
 295 GTAACAAGGACCCACGGGGCCGAAAGCCACGTCTGATGGA-CCCACCATGTGTGCAACC  
 296 GTGACAAGGACCCACGGGGCCGAAAGCCACGTCTAACGGA-CCCATCATGTGTGCAACC  
 260 GTGACAAGGACCCGCGGGGCCGAAAGCCACGTCTA-CGGA-CCCGTCTGTGTGCAAAC  
 61 GTAACAAGGACCCACGGGGCCAAAAGCCACGTCC-ACTGGA-CCCATCATGTGTGCAACC  
 132 GTAACAAGGACCCACGGGGCCAAAAGCCACGTCC-ACTGGA-CCCATCATGTGTGCAACC  
 125 GTAACAAGGACCCACGGGGCCAAAAGCCACGTCCAACGGA-CCCATCATGTGTGCAACC  
 126 GTAACAAGGACCCACGGGGCCAAAAGCCACGTCCAACGGA-CCCATCATGTGTGCAACC  
 173 GTAACAAGGACCCACGGGGCCAAAAGCCACGTCCAACGGA-CCCATCATGTGTGCAACC  
 204 GTAACAAGGACCCACGGGGCCAAAAGCCACGTCTGACGGA-CCCATCATGTGTGCAACC  
 174 GTAACAAGGACCCACGGGGCCAAAAGCCACGTCCAACGGA-CCCATCATGTGTGCAACC  
 175 GTAACAAGGACCCACGGGGCCAAAAGCCACGTCCAACGGA-CCCACCATGTGTGCAACC  
 205 GTAACAAGGACCCACGGGGCCAAAAGCCACGTCTAACGGA-CCCATCATGTGTGCAACC  
 127 GTAACAAGGACCCACGGGGCCAAAAGCCACGTCCAACGGA-CCCATCATGTGTGCAAAC  
 218 GTAACAAGGACCCACGGGGCCGAAAGCCACGTCTAATGGA-CCCATCATGTGTGCAACC  
 217 GTAACAAGGACCCACGGGGCCAAAAGCCACGTCTGACGGA-CCCGACATGTGTGCAACC  
 133 GTAACAAGGACCCACGGGGCCAAAAGCCACGTCCAC-TGGA-CCCACCATGTGTGCAACC  
 225 GTAACAAGGACCCACGGGGCCGAAAGCCACGTCCAACGGA-CCCACCATGTGTGCAACC  
 228 GTAACGAGGACCCGCGGGGCCGAAAGCCACGTCTTACGGA-CCCACCATGTGTGCAACC  
 255 GTAACAAGGACCCACGGGGCCGAAAGCCACGTCTAACGGA-CCCACCATGTGTGCAACC  
 266 GTAACAAGGACCCACGGGGCCGAAAGCCACGTCTGACGGA-CCCACATGTGTGCAACC  
 1 GTAACAAGGACCCACGGGGCCAAAAGCCACGCCACACGGG-CCCGTCATGTGTGCAACC  
 2 GTAACAAGGACCCACGGGGCCAAAAGCCACGCCACACGGG-CCCGTCATGTGTGCAACC  
 3 GTAACAAGGACCCACGGGGCCAAAAGCCACGCCACACGGG-CCCGTCATGTGTGCAACC  
 4 GTAACAAGGACCCACGGGGCCAAAAGCCACGCCACACGGG-CCCGTCATGTGTGCAACC

5 GTAACAAGGACCCACGGGGCCAAAAGCCACGCCAAACGGG-CCC GCCATGTGTGCAACC  
7 GTAACAAGGACCCACGGGGCCAAAAGCCACGTCCACATGGA-CCC GTCATGTGTGCAACC  
9 GTAACAAGGACCCACGGGGCCAAAAGCCACGTCCACATGGA-CCC GTCATGTGTGCAACC  
6 GTAACAAGGACCCACGGGGCCAAAAGCCACGTCCAAACGGA-CCC GTCATGTGTGCAACC  
8 GTAACAAGGACCCACGGGGCCAAAAGCCACGTCCACACGGA-CCC GTCATGTGTGCAACC  
10 GTAACAAGGACCCACGGGGCCAAAAGCCACGTCCGCAAGGA-CCC GTCATGTGTGCAACC  
12 GTAACAAGGACCCACGGGGCCAAAAGCCACGTCCGCAAGGA-CCC ATCATGTGTGCAACC  
11 GTAACAAGGACCCACGGGGCCAAAAGCCACGTCCACATGGA-CCC GTCATGTGTGCAACC  
13 GTAACAAGGACCCACGGGGCCAAAAGCCACGTCCACACGGA-CCC GTCATGTGTGCAACC  
22 GTAACAAGGACCCGCGGGGCCAAAAGCCACGTCCCAACGGA-CCC GTCATGTGTGCAACC  
23 GTAACAAGGACCCGCGGGGCCAAAAGCCACGTCCCAACGGA-CCC GTCATGTGTGCAACC  
18 GTAACAAGGACCCACGGGGCCAAAAGCCACGTCCAATCGGA-CCC ACCATGTGTGCAACC  
19 GTAACAAGGACCCACGGGGCCAAAAGCCACGTCCCAACGGA-CCC GTCATGTGTGCAACC  
14 GTAACAAGGACCCACGGGGCCAAAAGCCACGTCCGAATGGA-CCC GCCATGTGTGCAACC  
30 GTAACAAGGACCCACGGGGCCAAAAGCCACGTCCCAACGGA-CCC GTCATGTGTGCAACC  
24 GTAACAAGGACCCACGGGGCCAAAAGCCACGTCCACACGGA-CCC GTCATGTGTGCAACC  
35 GTAACAAGGACCCACGGGGCCAAAAGCCACGTCCCAACGGA-CCC GTCATGTGTGCAACC  
31 GTAACAAGGACCCACGGGGCCAAAAGCCACGTCCGACGGA-CCC GTCATGTGTGCAACC  
36 GTAACAAGGACCCACGGGGCCAAAAGCCACGTCCGAATGGA-CCC GTCATGTGTGCAACC  
15 GTAACAAGGACCCACGGGGCCAAAAGCCACGTCCGAATGGA-CCC GCCATGTGTGCAACC  
21 GTAACAAGGACCCACGGGGCCAAAAGCCACGTCCGAATGGA-CCC GTCATGTGTGCAACC  
20 GTAACAAGGACCCACGGGGCCAAAAGCCACGTCCGGATGGA-CCC GTCATGTGTGCAACC  
27 GTAACAAGGACCCACGGGGCCAAAAGCCACGTCCCAACGGA-CCC ATCATGTGTGCAACC  
16 GTAACAAGGACCCACGGGGCCAAAAGCCACGTCCGAATGGA-CCC ATCATGTGTGCAACC  
17 GTAACAAGGACCCACGGGGCCAAAAGCCACGTCCAATCGGA-CCC ATCATGTGTGCAACC  
79 GTAACAAGGACCCACGGGGCCAAAAGCCATGTCCCAACGGA-CCC ATCATGTGTGCAACC  
32 GTAACAAGGACCCACGGGGCCAAAAGCCACGTCCACATGGA-CCC ATCATGTGTGCAACC  
33 GTAACAAGGACCCACGGGGCCAAAAGCCACGTCCCAACGGA-CCC ATCATGTGTGCAACC  
37 GTAACAAGGACCCGCGGGGCCAAAAGCCACGTCCAGCGGA-CCC ATCATGTGTGTAACC  
25 GTAACAAGGACCCACGGGGCCAAAAGCCACGTCCGAATGGA-CCC GTCATGTGTGCAACC  
26 GTAACAAGGACCCACGGGGCCAAAAGCCACGTCCCAACGGA-CCC ATCATGTGTGCAACC  
38 GTAACAAGGACCCACGGGGCCAAAAGCCACGTCCCAACGGA-CCC ATCATGTGTGTAACC  
28 GTAACAAGGACCCACGGGGCCAAAAGCCACGTCCAATCGGA-CCC ATCATGTGTGCAACC  
34 GTAACAAGGACCCACGGGGCCAAAAGCCACGTCCCAACGGA-CCC ATCATGTGTGCAACC  
29 GTAACAAGGACCCACGGGGCCAAAAGCCACGTCCCAACGGA-CCC ATCATGTGTGCAACC  
39 GTAACAAGGACCCGCGGGGCCAAAAGCCACGTCCACGGAACCTATCATGTGTGCAACC  
40 GTAACAAGGACCCACGGGGCCAAAAGCCACGTCCAACGGA-CCC ATCATGTGTGCAACC  
58 GTGACAAGGACCCACGGGGCCAAAAGCCACGTCCGACGGA-CCC ATCATGTGTGCAACC  
59 GTAACAAGGACCCACGGGGCCAAAAGCCACGTCCCAACGGA-CCC TCCATGCGTGCAATTC  
81 GTAACAAGGACCCACGGGGCCAAAAGCCACGTCCCAACGGA-CCC AACATGTGTGCAACC  
82 GCAACAAGGACCCACGGGGCCAAAAGCCACGTCCCAACGGA-CCC ATCATGTGTGCAACC  
83 GTAACAAGGACCCACGGGGCCAAAAGCCACGTCC-ACTGGA-CCC ATCATGTGTGCAACC  
84 GTAACAAGGACCCACGGGGCCAAAAGCCACGTCC-ACTGGA-CCC ATCATGTGTGCAACC  
130 GTAACAAGGACCCACGGGGCCAAAAGCCACGTCCCAACGGA-CCC ACCATGTGTGCAACC  
131 GTAACAAGGACCCACGGGGCCAAAAGCCACGTCCCAACGGA-CCC ATCATGTGTGCAACC  
51 GTAACAAGGACCCACGGGGCCAAAAGCCACGTCCCAACGGA-CCC ACCATGTGTGCAACC  
52 GTAACAAGGACCCACGGGGCCAAAAGCCACGTCCGACGGA-CCC AACATGTGTGCAACC  
53 GTAACAAGGACCCACGGGGCCAAAAGCCACGTCCCAACGGA-CCC AACATGTGTGCAACC  
67 GTAACAAGGACCCACGGGGCCAAAAGCCACGTCCCAACGGA-CCC AACATGTGTGCAACC  
66 GTAACAAGGACCCACGGGGCCAAAAGCCACGTCCCAACGGA-CCC AACATGTGTGCAACC  
107 GTAACAAGGACCCACGGGGCCAAAAGCCACGTCCCAACGGA-CCC AACATGTGTGCAACC  
105 GTAACAAGGACCCGCGGGGCCAAAAGCCACGTCCCAACGGA-CCC ACCATGTGTGCAACC  
106 GTAACAAGGACCCGCGGGGCCAAAAGCCACGTCCCAACGGA-CCC AACATGTGTGCAACC  
65 GTAACAAGGACCCACGGGGCCAAAAGCCACGTCCCAACGGA-CCC ATCATGTGTGCAACC  
41 GTAACAAGGACCCACGGGGCCAAAAGCCACGTCCCAACGGA-CCC AACATGTGTGCAACC  
43 GTAACAAGGACCCACGGGGCCAAAAGCCACGTCCCAACGGA-CCC ACCATGTGTGCAACC  
98 GTAACAAGGACCCGCGGGGCCAAAAGCCACGTCCCAACGGA-CCC ACCATGTGTGCAACC  
44 GTGACAAGGACCCACGGGGCCAAAAGCCACGTCCCAACGGA-CCC ACCATGTGTGCAACC  
108 GTGACAAGGACCCACGGGGCCAAAAGCCACGTCCCAACGGA-CCC AACATGTGTGCAACC  
109 GTAACAAGGACCCACGGGGCCAAAAGCCACGTCCCAACGGA-CCC AACATGTGTGCAACC  
68 GTAACAAGGACCCACGGGGCCAAAAGCCACGTCCCAACGGA-CCC AACATGTGTGCAACC  
54 GTAACAAGGACCCACGGGGCCAAAAGCCACGTCCCAACGGA-CCC AACATGTGTGCAACC



136 GTAACAAGGACCCACGGGGCCGAAAGCCACGTCCAACGGA-CCCATCATGTGTGCAACC  
 264 GTAACAAGGACCCACGGGGCCGAAAGCCACGTCTAACGGA-CCCATCATGTGTGCAACC  
 89 GTAACAAGGACCCACGGGGCCGAAAGCCACGTCTAACGGA-CCCATCATGTGTGCAACC  
 95 GCAACAAGGACCCACGGGGCCGAAAGCCACGTCTGAAGGA-CCCACCATGTGTGCAACC  
 158 GTAACAAGGACCCGCGGGGCCGAAAGCCACGTCCGAACGGA-CCCACCATGTGTGCAACC  
 211 GTAACAAGGACCCACGGGGCCGAAAGCCACGTCTAACGGA-CCCACCATGTGTGCAACC  
 147 GTAACAGGGACCCGCGGGGCCAAAAGCCACGTCTCACGGA-CCCACCATGTGTGCAACC  
 163 GTAACAGGGACCCGCGGGGCCGAAAGCCACGTCTCACGGA-CCCATCATGTGTGCAACC  
 96 GTAACAGGGACCCGCGGGGCCAAAAGCCACGTCTCACGGA-CCCACCATGTGTGCAACC  
 159 GTAACAGGGACCCGCGGGGCCAAAAGCCACGTCTCACGGA-CCCACCATGTGTGCAACC  
 137 GTAACAAGGACCCACGGGGCCGAAAGCCACGTCCAACGGA-CCCACCATGTGTGCAACC  
 176 GTAACAAGGACCCACGGGGCCGAAAGCCACGTCTAACGGA-CCCACCATGTGTGCAACC  
 138 GTAACAGGGACCCGCGGGGCCAAAAGCCACGTCTCACGGA-CCCACCATGTGTGCAACC  
 140 GTAACAGGGACCCGCGGGGCCAAAAGCCACGTCTCACGGA-CCCACCATGTGTGCAACC  
 149 GTAACAGGGACCCGCGGGGCCAAAAGCCACGTCTCACGGA-CCCACCATGTGTGCAACC  
 188 GTAACAGGGACCCGCGGGGCCAAAAGCCACGTCTTACGGA-CCCACCATGTGTGCAACC  
 139 GTAACAGGGACCCGCGGGGCCAAAAGCCACGTCTCACGGA-CCCACCATGTGTGCAACC  
 187 GTAACAGGGACCCGCGGGGCCAAAAGCCACGTCTCACGGA-CCCACCATGTGTGCAACC  
 186 GTAACAGGGACCCGCGGGGCCAAAAGCCACGTCTCACGGA-CCCACCATGTGTGCAACC  
 184 GTAACAAGGACCCACGGGGCCAAAAGCCACGCCCTAACGGA-CCCACCATGTGTGCAACC  
 185 GTAACAAGGACCCACGGGGCCAAAAGCCACGCCCTAACGGA-CCCACCATGTGTGCAACC  
 97 GTAACAAGGACCCACGGGGCCGAAAGCCACGTCTAACGGA-CCCACCATGTGTGCAACC  
 164 GTGACAAGGACCCGCGGGGCCGAAAGCCACGTCTAACGGA-CCCATCATGTGTGCAACC  
 165 GTGACAAGGACCCGCGGGGCCGAAAGCCACGTCTAACGGA-CCCACCATGTGTGCAACC  
 90 GTAACAAGGACCCACGGGGCCGAAAGCCACGTCTAACGGA-CCCATCATGTGTGCAACC  
 91 GTAACAAGGACCCACGGGGCCGAAAGCCACGTCTAACGGA-CCCATCATGTGTGCAACC  
 243 GTGACAAGGACCCACGGGGCCGAAAGCCACGTCTAACGGA-CCCATCATGTGTGCAACC  
 242 GTAACAAGGACCCACGGGGCCGAAAGCCACGTCTAACGGA-CCCACCATGTGTGCAACC  
 252 GTAACAAGGACCCACGGGGCCGAAAGCCACGTCTAACGGA-CCCACCATGTGTGCAACC  
 194 GTAACAAGGACCCACGGGGCCGAAAGCCACGTCTAACGGA-CCCATCATGTGTGCAACC  
 195 GTAACAAGGACCCGCGGGGCCGAAAGCCACGTCTGACGGA-CCCATCATGTGTGCAACC  
 169 GTGACAAGGACCCGCGGGGCCGAAAGCCACGTCTAACGGA-CCCACCATGTGTGCGACC  
 170 GCAACAAGGACCCACGGGGCCGAAAGCCACGTCTAACGGA-CCCACCATGTGTGCGACC  
 196 GTGACAAGGACCCGCGGGGCCGAAAGCCACGTCTAACGGA-CCCATCATGTGTGCAACC  
 197 GTGACAAGGACCCGCGGGGCCGAAAGCCACGTCTAACGGA-CCCACCATGTGTGCGACC  
 231 GTGACAAGGACCCGCGGGGCCGAAAGCCACGTCTAACGGA-CCCATCATGTGTGCAACC  
 232 GCGACAAGGACCCGCGGGGCCGAAAGCCACGTCTAACGGA-CCCACCATGTGTGCAACC  
 230 GTGACAAGGACCCGCGGGGCCGAAAGCCACGTCTGATGGA-CCCATCATGTGTGCAACC  
 233 GCGACAAGGACCCACGGGGCCGAAAGCCACGTCTTGTGGA-CCCACCATGTGTGCAACC  
 234 GCGACAAGGACCCACGGGGCCGAAAGCCACGTCTTGTGGA-CCCACCATGTGTGCAACC  
 235 GCGACAAGGACCCACGGGGCCGAAAGCCACGTCTTGTGGA-CCCACCATGTGTGCAACC  
 229 GCGACAAGGACCCACGGGGCCGAAAGCCACGTCTTGTGGA-CCCGTCATGTGTGCAACC  
 265 GTGACAAGGACCTGCGGGGCCGAAAGCCACGTCTAATGGA-CCCATATGTGTGCAACC  
 282 GTGACAAGGACCTGCGGGGCCGAAAGCCACGTCTAATGGA-CCCATCATGTGTGCGATC  
 256 GTGACAGGGACCCACGGGGCCGAAAGCCACGTCTAACGGA-CCCATCATGTGTGCAACC  
 49 GTAACAAGGACCCACGGGGCCAAAAGCCACGTCTCACGGA-CCCATCATGTGTGCAACC  
 50 GTAACAAGGACCCACGGGGCCAAAAGCCACGTCTCACGGA-CCCATCATGCGTGCAACC  
 48 GTAACAAGGACCCACGGGGCCAAAAGCCACGTCTCACGGA-CCCATCATGTGTGCAACC  
 63 GTAACAGGGACCCGCGGGGCCGAAAGCCACGTCTCACGGG-CCCATCATGTGTGCAACC  
 104 GTAACAGGGACCCGCGGGGCCGAAAGCCACGTCTCACGGA-CCCACCATGTGTGCAACC  
 93 GTAACAAGGACCCGCGGGGCCGAAAGCCACGTCTCGCGGA-CCCGTCATGTGTGCAACC  
 94 GCAACAAGGACCCACGGGGCCGAAAGCCACGTCTGAAGGA-CCCGTCATGTGTGCAACC  
 92 GTAACAAGGACCCACGGGGCCGAAAGCCACGTCTAACGGA-CCCACCATGTGTGCAACC  
 167 GTAACAGGGACCCGCGGGGCCAAAAGCCACGTCTTACGGA-CCCACCATGTGTGCAACC  
 168 GTAACAGGGACCCGCGGGGCCAAAAGCCACGTCTTACGGA-CCCATCATGTGTGCAACC  
 64 GTAACAAGGACCCACGGGGCCAAAAGCCACGTCTCAC- TGA-CCCATCATGTGTGCAACC  
 181 GTAACAGGGACCCGCGGGGCCAAAAGCCACGTCTCACGGA-CCCACCATGTGTGCAACC  
 141 GTAACAGGGACCCGCGGGGCCAAAAGCCACGTCTCACGGA-CCCACCATGTGTGCAACC  
 152 GTAACAGGGACCCGCGGGGCCAAAAGCCACGTCTCACGGA-CCCACCATGTGTGCAACC  
 144 GTAACAGGGACCCGCGGGGCCAAAAGCCACGTCTCACGGA-CCCACCATGTGTGCAACC  
 150 GTAACAGGGACCCGCGGGGCCAAAAGCCACGTCTCACGGA-CCCACCATGTGTGCAACC  
 151 GTAACAGGGACCCGCGGGGCCAAAAGCCACGTCTCACGGA-CCCACCATGTGTGCAACC

145 GTAACAGGGACCCGCGGGGCCAAAAGCCACGTCTCACGGA-CCCATCATGTGTGCAACC  
156 GTAACAGGGACCCGCGGGGCCAAAAGCCACGTCTCACGGA-CCCATCATGTGTGCAACC  
148 GTAACAGGGACCCGCGGGGCCAAAAGCCACGTCTCACGGA-CCCACCATGTGTGCAACC  
143 GTAACAGGGACCCGCGGGGCCAAAAGCCACGTCTCACGGA-CCCACCATGTGTGCAACC  
155 GTAACAGGGACCCGCGGGGCCAAAAGCCACGTCTCACGGA-CCCACCATGTGTGCAACC  
154 GTAACAGGGACCCGCGGGGCCAAAAGCCACGTCTCACGGA-CCCACCATGTGTGCAACC  
189 GTAACAGGGACCCGCGGGGCCAAAAGCCACGTCTCACGGA-CCCACCATGTGTGCAACC  
142 GTAACAGGGACCCGCGGGGCCAAAAGCCACGTCTCACGGA-CCCACCATGTGTGCAACC  
153 GTAACAGGGACCCGCGGGGCCAAAAGCCACGTCTCACGGA-CCCACCATGTGTGCAACC  
190 GTAACAGGGACCCGCGGGGCCAAAAGCCACGTCTCACGGA-CCCACCATGTGTGCAACC  
99 GTAACAGGGACCCGCGGGGCCAAAAGCCACGTCTCACGGA-CCCACCATGTGTGCAACC  
191 GTAACAGGGACCCGCGGGGCCAAAAGCCACGTCTCACGGA-CCCACCATGTGTGCAACC  
192 GTAACAGGGACCCGCGGGGCCAAAAGCCACGTCTCACGGA-CCCACCATGTGTGCAACC  
160 GTAACAGGGACCCGCGGGGCCAAAAGCCACGTCTCACGGA-CCCACCATGTGTGCAACC  
180 GTAACAGGGACCCGCGGGGCCAAAAGCCACGTCTCACGGA-CCCACCATGTGTGCAACC  
213 GTAACAGGGACCCGCGGGGCCAAAAGCCACGTCTCACGGA-CCCACCATGTGTGCAACC  
100 GTAACAGGGACCCGCGGGGCCAAAAGCCACGTCTCACGGA-CCCATCATGTGTGCAACC  
101 GTAACAAGGACCCACGGGGCCAAAAGCCACGTCTAACGGA-CCCATCATGTGTGCAACC  
146 GTAACAAGGACCCACGGGGCCAAAAGCCACGTCTGAAGGA-CCCACCATGTGTGCAACC  
157 GCAACAAGGACCCACGGGGCCAAAAGCCACGTCTGAAGGA-CCCATCATGTGTGCAACC  
162 GCAACAAGGACCCACGGGGCCAAAAGCCACGTCTGAAGGA-CCCACCATGTGTGCAACC  
182 GTAACAAGGACCCGCGGGGCCAAAAGCCACGTCTAACGGA-CCCATCATGTGTGCAACC  
183 GTAACAAGGACCCACGGGGCCAAAAGCCACGTCTAACGGA-CCCACCATGTGTGCAACC  
102 GTAACAAGGACCCACGGGGCCAAAAGCCACGTCTCAATGGA-CCCATCATGTGTGCAACC  
161 GTAACAGGGACCCGCGGGGCCAAAAGCCACGTCTCACGGA-CCCATCATGTGTGCAACC  
193 GTGACAAGGACCCGCGGGGCCAAAAGCCACGTCTAACGGA-CCCATCATGTGTGCAACC  
227 GTAACAAGGACCCACGGGGCCAAAAGCCACGTCTCACGGA-CCCACCATGTGTGCAACC  
254 GTGACAAGGACCCACGGGGCCAAAAGCCACGTCTAACGGA-CCCATCATGTGTGCAACC  
214 GTGACAAGGACCCGCGGGGCCAAAAGCCACGTCTAGCGGA-CCCACCATGTGTGCAACC  
179 GTAACAGGGACCCGCGGGGCCAAAAGCCACGTCTCACGGA-CCCACCATGTGTGCAACC  
212 GTGACAAGGACCCGCGGGGCCAAAAGCCACGTCTCACGGA-CCCACCATGTGTGCAACC  
241 GTAACAGGGACCCGCGGGGCCAAAAGCCACGTCTCAGCGGA-CCCATCATGTGTGCAACC  
210 GTAACAAGGACCCACGGGGCCAAAAGCCACGTCTGACGGA-CCCATCATGTGTGCAACC  
223 GTAACAAGGACCCACGGGGCCAAAAGCCACGTCTTACGGA-CCCATCATGTGTGCAACC  
239 GTAACAAGGACCCACGGGGCCAAAAGCCACGTCTCA--GGA-CCCACCATGTGTGCAACC  
262 GTAACAAGGACCCACGGGGCCAAAAGCCACGTCTCA--GGA-CCCATCATGTGTGCAACC  
240 GTAACAAGGACCCACGGGGCCAAAAGCCACGTCTCA--GGA-CCCACCATGTGTGCAACC  
284 GTAACAAGGACCCACGGGGCCAAAAGCCACGTCTCA--GGA-CCCACCATGTGTGCAACC  
251 GTGACAAGGACCCGCGGGGCCAAAAGCCACGTCTCA-CGGA-CCCACCATGTGTGCAACC  
263 GTGACAAGGACCCGCGGGGCCAAAAGCCACGTCTCA-CGGA-CCCATCATGTGTGCAACC  
250 GTAACAAGGACCCGCGGGGCCAAAAGCCACGTCTAACGGA-CCCATCATGTGTGCAACC  
224 GTAACAAGGACCCACGGG-CCGAAAAGCCACGTCTAACGGA-CCCATCATGTGTGCAACC  
237 GTGACAAGGACCCGCGGGGCCAAAAGCCACGCCCT-ACGGA-CCCATCATGTGTGCAACC  
281 GTGACAAGGACCCGCGGGGCCAAAAGCCACGTCT-ACGGA-CCCATCATGTGTGCAACC  
221 GTGACAAGGACCCGCGGGGCCAAAAGCCACGCCCT-ACGGA-CCCACCATGTGTGCAACC  
226 GTAACAGGGACCCGCGGGGCCAAAAGCCACGTCTCACGGA-CCCATCATGTGTGCAACC  
253 GTAACAGGGACCCGCGGGGCCAAAAGCCACGTCTCACGGA-CCCACCATGTGTGCAACC  
286 GTAACAAGGACCCACGGGGCCAAAAGCCACGTCTAACGGA-CCCACCATGTGTGCAACC  
279 GTAACAAGGACCCACGGGGCCAAAAGCCACGTCTGACGGA-CCCACCATGTGTGCAACC  
287 GTGACAAGGACCCACGGGGCCAAAAGCCACGTCCAAACGGA-CCCACCATGTGTGCAACC  
267 GTGACAAGGACCCACGGGGCCAAAAGCCACGTCTAACGGA-CCCACCATGTGTGCAACC  
291 GTAACAAGGACCCACGGGGCCAAAAGCCACGTCTAACGGA-CCCACCATGTGTGCAACC  
301 GTAACAAGGACCCGCGGGGCCAAAAGCCACGTCTAACGGA-CCCACCATGTGTGCAACC  
269 GTAACAAGGACCCACGGGGCCAAAAGCCACGTCCAAACGGA-CCCACCATGTGTGCAACC  
289 GTGACAAGGACCCACGGGGCCAAAAGCCACGTCCAGATGGA-CCCATCATGTGTGCAACC  
302 GTGACAAGGACCCACGGGGCCAAAAGCCACGTCCGACGGA-CCCACCATGTGTGCAACC  
274 GTGACAAGGACCCACGGGGCCAAAAGCCACGTCCAGACGGA-CCCACCATGTGTGCAACC  
275 GTGACAAGGACCCACGGGGCCAAAAGCCACGTCCAGACGGA-CCCACCATGTGTGCAACC  
297 GTAACAAGGACCCACGGGGCCAAAAGCCACGTCTCACGGA-CCCACCATGTGTGCAACC  
304 GTAACAAGGACCCGCGGGGCCAAAAGCCACGTCTTACGGA-CCCACCATGTGTGCAACC  
270 GTAACAGGGACCCACGGGGCCAAAAGCCACGTCTAACGGA-CCCACCATGTGTGCAACC  
298 GTGACAAGGACCCACGGG-CCGAAAAGCCACGTCTAACGGA-CCCACCATGTGTGCAACC



283 GTAAACAAGGACCCACGGGGCCGAAAGCCACG-CCTAACGGA-CCCACCATGTGTGCAACC  
 300 GTAAACAAGGACCCACGGGGCCGAAAGCCACGTCTAACGGA-CCCACCATGTGTGCAACC  
 271 GTAAACAAGGACCCACGGGGCCGAAAGCCACGTCTCA-GGA-CCCACCATGTGTGCAACC  
 272 GTAAACAAGGACCCACGGGGCCGAGAGCCACGTCTCA-GGA-CCCACCATGTGTGCAACC  
 273 GTGACAAGGGCCACGGGGCCGAAAGCCACGTCCAGACGGA-CCCACCATGTGTGCAACC  
 285 GTGACAAGGGCCACGGGGCCGAAAGCCACGTCCAGACGGA-CCCATTATGTGTGCAACC  
 303 GTGACAAGGACCCACGGGGCCGAAAGCCACGTCTT-GGA-CCCACCATGTGTGCAACC  
 309 GTGACAAGGACCCACGGGGCCAAAAGCCACGTCCGGACGGA-CCCAACATGTGTGCAACC  
 312 GCGACAAGGACCCGCGGGGCCGAAAGCCACGTCTT-TGA-CCCAACATGCGTGCAACC  
 313 GCGACAAGGACCCGCGGGGCCGAAAGCCACGTCTT-TGAA-CCTTGATGTGTGCAACC  
 316 GTAACATGGACTCACCGGGCCAAAAGCCACGCCTCA-CGGA-CCTTGATGTGTGCAACC  
 318 GTAAACAAGGACCCGCGGGGCCGAAAGCCACGTCTC-TGAA-CCTTGATGTGTGCAACC  
 314 GTGACAAGGGCCACGGGGCCGAAAGCCACGTCTC-TGAA-CCTTGATGTGTGCAACC  
 315 GTGACAAGGACCCGTGGGGCCGAAAGCCACGTCTC-TG-A-CCTCATGTGTGCAACC  
 317 GTGACAGGGACCCACGGGGCCGAAAGCCACGTCTC-TGAA-CCTTGCGTGTGTGCAACC  
  
 310 CCAGCACGGCAACTT-GCCACGAAAACCACTTCAAGTAACACTGATACTGGTACTCAA  
 311 CCAGCACGGCAACTT-GCCACGAAAACCACTTCAAGTAACACTGATACTGGTACTCAA  
 307 CCAGCACGGCAACTTT-ACTGCGAACGCCACCTTAAGGTGACACTGATACTGGTACTCGG  
 308 CCAGCACGGCAACTTT-ACTGCGAACCCACCTTAAGGCAACGCTGATACTGGTACTCAG  
 306 CCAGCACGGCAACTTT-ACTGCGAACCCACCTTAAGGTGACACTGGTACTCGG  
 276 CCAGCACGGCAACTTT-ACTGTAAAACCACTTAAAGGTGACACTGATACTGGTACTCAA  
 277 CCAGCACGGCAACTT-ACTGTAAAACCACTTAAAGGTGACACTGGTACTGGTACTCAA  
 278 CCAGCACGGCAACTT-ACTGTAAAACCACTTAAAGGTGACACTGATACTGGTACTCAA  
 288 CCAGCACGGCAACTTT-ACTGCGAACCCACTTAAAGGTGACACTGATACTGGTACTCAA  
 305 CCAGCACGGCAACTTT-ACCACGAAAACCACTTAAAGGTGACACTGATACTGGTACTCAA  
 290 CCAGCACGGCAACT-T-ACTGTAAAACCACTTAAAGTGGCACTGATACTGGTACTCAA  
 292 CCAGCACGGCAACCAT-ACTACGAAAACCACTTAAAGTGGCACTGATACTGGTACTCAA  
 244 CCGGCACGGCAACTTT-GTTGTGAAAAGCCACTTCAAGGTGACACTGATACTGGTACTCAG  
 257 CCAGCACGGCAACTTT-ACCACGAAAACCACTTCAAGGTGACACTGATACTGGTACTCAG  
 299 CCAGCACGGCAATTTT-TCTGTGAAAACCACTTAAAGGTGACACTGATACTGGTACTCAA  
 245 CCAGCACGGCAACTTT-GTCTCGAAACCCACTTAAAGGTGACACTGATACTGGTACTCAG  
 258 CCAGCACGGCAACTTT-GTCTCGAAACCCACTTAAAGGTGACACTGATACTGGTACTCAG  
 236 CCAGCACGGCAACTTT-GTCTCGAAACCCACTTAAAGGTGACACTGATACTGGTACTCAA  
 246 CCAGCACGGCAACTTT-GTCTCGAAACCCACTTAAAGGTGACACTGATACTGGTACTCAG  
 259 CCAGCACGGCAACTTT-GTCTCGAAACCCACTTAAAGGTGACATTGATACTGGTACTCAC  
 268 CCGGCACGGCAACTTT-GTTGTGAAAAGCCACTTAAAGGTGACACTGATACTGGTACTCAA  
 280 CCAGCACGGCAACTTT-GTCCGAAAACCCACTTAAAGGTGACACTGATACTGGTACTCAA  
 247 CCAGCACGGCAACTTT-GTCTCGAAACCCACTTAAAGGTGACACTGAAACTGGTACTCAA  
 220 CCAGCACGGCAACTTT-GTCTCGAAACCCACTTAAAGGTGACACTGATACTGGTACTCAA  
 222 CCAGCACGGCAACTTT-ACTGCGAAAACCGCTTAAAGGTGACACTGATACTGGTACTCAA  
 238 CCAGCACGGCAACTTT-ACCACGAAAACCACTTAAAGGTGACACTGAAACTGGTACTCAA  
 248 CCAGCACGGCAACTTT-ACCACGAAAACCACTTAAAGGTGACACTGATACTGGTACTCAA  
 261 CCAGCACGGCAACTTC-ACCACGAAAACCACTTAAAGGTGACACTGATACTGGTACTCAA  
 249 CCAGCACAGCAATTTT-ACTGTGAAAACCACTTAAAGGTGACACTGATACTGGTACTCAA  
 293 CCAGCACGGCAACCAT-ACTACGAAAACCACTTAAAGGTGACACTGATACTGGTACTCAA  
 294 CCAGCACAGCAATTTT-CCTGCGAAAACCACTTAAAGGTGACACTGAAACTGGTACTCAA  
 295 CCAGCACGGCAACTTT-ACCACGAAAACCACTTAAAGGTGACACTGATACTGGTACTCAA  
 296 CCAGCACAGCAACTTT-ACTGCGAAAAGCCACTTAAAGGTGACACTGATACTGGTACTCAA  
 260 CCAGCACAGCAGCTTT-ACTGCGAAAACCACTTAAAGGTGACACTGAAACTGGTACTCAA  
 61 CCAGCACGGCAACTTT-ACTGTGAAAAGCCACTTAAAGGTGACACTGATACTGGTACTCAA  
 132 CCAGCACAGCAACTTT-ACTGTGAAACACACTTAAAGGTGACACTGATACTGGTACTCAA  
 125 CCAGCACGGCAACTTT-ACTGTGAAAACCACTTAAAGGTGATACTGATACTGGTACTCAA  
 126 CCAGCACGGCAACTTT-ACTGTGAAAACCACTTAAAGGTGACACTGATACTGGTACTCAA  
 173 CCAGCACGGCAACTTT-ACTGTGAAAACCACTTAAAGGTGATACTGATACTGGTACTCAA  
 204 CCAGCACGGCAACTTT-ACTGTGAAAACCACTTAAAGGTGACACTGATACTGGTACTCAA  
 174 CCAGCACGGCAACTTT-ACTGTGAAAACCACTTAAAGGAAACACTGATACTGGTACTCAA  
 175 CCAGCACGGCAACTTT-ACTGTGAAAACCACTTAAAGGAAACACTGATACTGGTACTCAA  
 205 CCAGCACGGCAACTTT-ACTGTGAAAACCACTTAAAGGTGACACTGATACTGGTACTCAA  
 127 CCAGCACGGCAACTTT-ACTGCGAAAACCACTTAAAGGTGCCACTGATACTGGTACTCAA  
 218 CCAGCACGGCAACTT-ACTGTGAAAAGCCACTTAAAGGTGACACTGATACTGGTACTCAA  
 217 CCAGCACGGCAACTTT-ACTGTGAAAACCACTTAAAGGTGACACTGATACTGGTACTCAA

133 CCAGCACGGCAACTTT-ACTGTGAAAACCACTTTAAAGTGACACTGATACTGGTACTCAA  
225 CCAGCACGGCAACTTT-ACTGTGAAAACCACTTTAAGGTGACTGATACTGGTACTCAA  
228 CCAGCACGGCAGCTCT-ACTGTGAAAACCACTTTAAGGTGACACTGATACTGGTACTCAA  
255 CCAGCACGGCAACTTT-ACTGTGAAAACCACTTTAAGGTGACACTGATACTGGTACTCAA  
266 CCAGCACGGCAGCTTT-ACCACAAAACCACTTTAAAGTGACACTGAAACTGGTACTCAA  
1 CCAGCACGGCAGCTTT-ACTGCGAAAACCACTTTAAAGTGACATCGAAACTGGTACCCAC  
2 CCAGCACGGCAGCTTT-ACTGCGAAAACCACTTTAAAGTGACATCGAAACTGGTACCCAC  
3 CCAGCACGGCAACTTT-ACTGCGAAAACCACTTTAAAGTGACATTGAAACTGGTACCCAC  
4 CCAGCACGGCAACTTT-ACTGCGAAAACCACTTTAAGGTGACATTGACACTGGTACCCAA  
5 CCAGCACGGCAACTTT-ACTGCGAAAACCACTTTAAAGTGACATTGATACTGGTACCCAA  
7 CCAGCACGGCAACTTT-ACTGTGAAAACCACTTTAAAGTGACACTGATACTGGTACCCAA  
9 CCAGCACGGCAACTTT-ACTGTGAAAACCACTTTAAAGTGACACTGATACTGGTACCCAA  
6 CCAGCACGGTAGCTTT-GTTGTGAAACACACTTTAAAGTGACACTGAAACTGGTACCCAA  
8 CCAGCACGGTAGCTTT-GTTGTGAAACACACTTTAAAGTGACATTGAAACTGGTACCCAA  
10 CCAGCACGGTAGCTTT-GTTGTGAAACACACTTTAAAGTGACATTGAAACTGGTACCCAA  
12 CCAGCACAGCAACTTT-ACTGTGAAACTCACTTTAAAGTGACATTGATACTGGTACCCAA  
11 CCAGCACGGCAACTTT-ACTGTGAAACTCACTTTAAGATGACATTGATACTGGTACCCAA  
13 CCAGCACGGTAGCTTT-GTTGTGAAAACCACTTTAAAGTGACATTGATACTGGTACCCAA  
22 CCAGCACAGCAACTTT-TCTGTGAAACTCACTTTAAAGTGACATTGATACTGGTACCCAA  
23 CCAGCACGGTAGCTTT-GCTGTGAAACTCACTTTAAAGTGACATTGATACTGGTACCCAA  
18 CCAGCACGGCAACTTT-ACTGCGAAAACCACTTTAAAGTGACATTGATACTGGTACCCAA  
19 CCAGCACGGTAGCTTT-GTTGTGAAACTCACTTTAAAGTGACATTGATACTGGTACCCAA  
14 CCAGCACGGTAGCTTT-GTTGTGAAAACCACTTTAAAGTGACATTGATACTGGTACCCAA  
30 CCAGCACAGTAGCTTT-GTTGTGAAACTCACTTTAAAGTGACATTGATACTGGTACCCAA  
24 CCGGCACGGTAGCTTT-GTTGTGAAAACCACTTTAAGGTGACACTGATACTGGTACTCAA  
35 CCAGCACAGTAGCTTT-GTTGTGAAACTCACTTTAAAGTGACATTGATACTGGTACTCAA  
31 CCAGCACGGTAGCTTT-GCTGTGAAAACCACTTTAAGGTGACACTGATACTGGTACTCAG  
36 CCAGCACAGTACCTTT-GTTGTGAAAACCACTTTCAAGGTGACACTGATACTGGTACTCAA  
15 CCAGCACGGTAGCTTT-GTTGTGAAACTCACTTTCAAGGTGACACTGATACTGGTACTCAA  
21 CCAGCACAGCAACTTT-TCTGTGAAAACCACTTTCAAGGTGACACTGATACTGGTACTCAA  
20 CCAGCACGGTAGCTTT-GTTGTGAAAACCACTTTCAAGGTGACACTGATACTGGTACTCAA  
27 CCAGCACAGCAACTTT-TCTGCGAAAACCACTTTAAGGTGACACTGATACTGGTACTCAA  
16 CCAGCACAGCAACTTT-TCTGCGAAAACCACTTTCAAGGTGACACTGATACTGGTACTCAA  
17 CCAGCACAGCAACTTT-TCTGCGAAAACCACTTTAAGGTGACATTGATACTGGTACTCAA  
79 CCAGCACAGCAACTTT-TCTACGAAAACCACTTTAAGGTGACACTGATACTGGTACTCAA  
32 CCAGCACAACTTT-TCTGTGAAAACCACTTTAAGGTGACACTGATACTGGTACTCAG  
33 CCAGCACAACTTT-TCTGTGAAAACCACTTTAAGGTGACACTGATACTGGTACTCAA  
37 CCAACACGGCAGCTTT-TCTGTGAAAACCACTTTAAGGTGACACTGATACTGGTACTCAA  
25 CCAGCACGGCAGCTTT-TCTGTGAAAACCACTTTAAGGTGACACTGATACTGGTACTCAG  
26 CCAGCACAACTTT-TCTGTGAAAACCACTTTCAAGGTGACACTGATACTGGTACTCAA  
38 CCAACACGGCAGCTTT-TCTGTGAAAACCACTTTAAGGTGACACTGATACTGGTACTCAA  
28 CCAGCACGGCAGCTTT-TCTGTGAAAACCACTTTAAGGTGACACTGATACTGGTACTCAA  
34 CCAGCACGGCAGCTTT-TCTGTGAAAACCACTTTAAAGTGACATTGATACTGGTACTCAA  
29 CCAGCACGGCAGCTTT-TCTGTGAAAACCACTTTAAAGTGACATTGATACTGGTACTCAA  
39 CCAGCACAGCAACTTT-TCTGTGAAACCTACCTTAAGGTGACGCTGATACTGGTACTCAG  
40 CCAGCACAACTTT-TCTGTGAAAACCACTTTCAAGGTGACATTGATACTGGTACTCAA  
58 CCAGCACGGCAGCTTT-CCTGTGAAAACCACTTTAAGATGACATTGATACTGGTACCCAA  
59 CCAGCACGGCAACTTT-ACTGTGAAATCCACTTTAAGATGACATTGATACTGGTACCCAA  
81 CCAGCACGGCAGCTTT-ACTGTGAAACTCACTTTAAGATGACATTGATACTGGTACCCAC  
82 CCAGCACAGCAACTTT-ACTGTGAAACTCACTTTAAGATGACATTGATACTGGTACCCAC  
83 CCAGCACAGCAACTTT-ACTGTGAAACTCACTTTAAGATGACATTGATACTGGTACCCAC  
84 CCAGCACAGCAACTTT-ACTGTGAAACTCACTTTAAGATGACATTGATACTGGTACCCAC  
130 CCAGCACGGCAACTTT-ACTGCGAAAACCACTTTAAGATGACATTGATACTGGTACCCAC  
131 CCAGCACAGCAACTTT-ACTGTGAAACTCACTTTAAGATGACATTGATACTGGTACCCAC  
51 CCAGCACGGCAACTTT-TCTGTGAAAACCACTTTCAAGGTGACATTGATACTGGTACTCAA  
52 CCAGCACGGCAGCTTT-ACTGTGAAAACCACTTTCAAGGTGACATTGATACTGGTACTCAA  
53 CCAGCACGGCAGCTTT-ACTGTGAAAACCACTTTCAAGGTGACATTGATACTGGTACTCAA  
67 CCAGCACGGCAGCTTT-ACTGTGAAAACCACTTTCAAGGTGACATTGATACTGGTACTCAA  
66 CCAGCACGGCAGCTTT-ACTGTGAAAACCACTTTCAAGGTGACATTGATACTGGTACTCAA  
107 CCAGCACGGCAGCTTT-ACTGTGAAAACCACTTTCAAGGTGACATTGATACTGGTACTCAA  
105 CCAGCACGGCAACTTT-ACTGTGAAAACCACTTTCAAGGTGACATTGATACTGGTACTCAA  
106 CCAGCACGGCAGCTTT-ACTGTGAAAACCACTTTCAAGGTGACATTGATACTGGTACTCAA



172 CCAGCACGGCAACTTT-ACTGTGAAAACCACTTCAAGGTGATACTGATACTGGTACTCAA  
123 CCAGCACGGCAACTT-ACTGTGAAAACCACTTCAAGGTGATACTGATACTGGTACTCAA  
124 CCAGCACGGCAACTTT-ACTGTGAAAACCACTTCAAGGTGATACTGATACTGGTACTCAA  
128 CCAGCACGGCAACTTT-ACTGTGAAAACCACTTTAAGGTGACACTGATACTGGTACTCAA  
129 CCAGCACGGCAACTTT-ACTGTGAAAACCACTTTAAGGTGACACTGATACTGGTACTCGA  
177 CCAGCACGGCAACTTT-ACTGTGAAAAGCCACTTTAAGGTGACGCTGATACTGGTACTCAA  
209 CCAGCACGGCAACTTT-ACGGCGAAAACCGCTTTAAGGTGACACTGACACTGGTACTCAA  
178 CCAGCACGGCAACTTT-ACTGTGAAAACCACTTTAAGGTGACACTGATACTGGTACTCAA  
208 CCAGCACGGCAACTTT-ACTATGAAAACCACTTTAAGGTGACACTGATACTGGTACTCAA  
136 CCAGCACGGCAACTTT-ACTGTGAAAACCACTTTAAGGTGACACTGATACTGGTACTCAA  
264 CCAGCACGGCAGCTTT-GCTGAGAAAACCACTTTAAGGTGACACTGATACTGGTACTCAA  
89 CCAGCACGGCAACTTT-ACTGTGAAAAGCCACTTTAAGGTGACACTGATACTGGTACTCAA  
95 CCAGCACGGCAACTTT-ACTGTGAAAACCACTTTAAGGTGACATTGATACTGGTACTCAA  
158 CCAGCACGGCAACTTT-ACTGTGAAAACCACTTTAAGGTGACACTGATACTGGTACTCAA  
211 CCAGCACGGCAACTTT-ACTGTGAAAACCACTTTAAGGTGACACTGATACTGGTACTCAA  
147 CCAGCACGGCAACTTT-ACTGTGAAAACCACTTTAAGGTGACACTGATACTGGTACTCAA  
163 CCAGCACGGCAACTTT-ACTGTGAAAACCACTTTAAGGTGACACTGATACTGGTACTCAA  
96 CCAGCACGGCAGCTTT-ACTGTGAAAACCACTTTAAGGTGACACTGATACTGGTACTCAA  
159 CCAGCACGGCAACTTT-ACTGTGAAAACCACTTTAAGGTGACACTGATACTGGTACTCAA  
137 CCAGCACGGCAACTTT-ACTGTGAAAACCACTTTAAGGTGACACTGATACTGGTACTCAA  
176 CCAGCACGGCAACTTT-ACTGTGAAAACCACTTTAAGGTGACACTGACACTGGTACTCAA  
138 CCAGCACGGCAACTTT-ACTGTGAAAACCACTTTAAGGTGACACTGATACTGGTACTCAA  
140 CCAGCACGGCAACTTT-ACTGTGAAAACCACTTTAAGGTGACACTGATACTGGTACTCAA  
149 CCAGCACGGCAACTTT-ACTGTGAAAACCACTTTAAGGTGACACTGATACTGGTACTCAA  
188 CCAGCACGGCAACTTT-ACTGTGAAAACCACTTTAAGGTGACACTGATACTGGTACTCAA  
139 CCAGCACGGCAACTTT-ACTGTGAAAACCACTTTAAGGTGACACTGATACTGGTACTCAA  
187 CCAGCACGGCAACTTT-ACTGTGAAAACCACTTTAAGGTGACACTGATACTGGTACTCAA  
186 CCAGCACGGCAACTTT-ACTGTGAAAACCACTTTAAGGTGACACTGATACTGGTACTCAA  
184 CCAGCACGGCAACTTT-ACTGCGAAAACCACTTTAAGGTGACACTGATACTGGTACTCAA  
185 CCAGCACGGCAACTTT-ACTGTGAAAACCACTTTAAGGTGACACTGATACTGGTACTCAA  
97 CCAGCACGGCAACTTT-ACTGTGAAAACCACTTTAAGGTGACACTGATACTGGTACTCAA  
164 CCAGCACGGCAACTTT-ACTGTGAAAACCACTTTAAGGTGACACTGATACTGGTACTCAA  
165 CCAGCACGGCAACTTT-ACTGTGAAAACCACTTTAAGGTGACACTGATACTGGTACTCAA  
90 CCAGCACGGCAACTTT-ACTGTGAAAAGCCACTTTAAGGTGACACTGATACTGGTACTCAA  
91 CCAGCACGGCAACTTT-ACTGTGAAAAGCCACTTTAAGGTGACACTGATACTGGTACTCAA  
243 CCAGCACGGCAACTTT-ACTGTGAAAACCACTTTAAGGTGACACTGATACTGGTACTCAA  
242 CCAGCACGGCAACTTT-ACTGCGAAAACCACTTTAAGGTGACACTGATACTGGTACTCAA  
252 CCAGCACGGCAACTTT-ACTGTGAAAACCACTTTAAGGTGACACTGATACTGGTACTCAA  
194 CCAGCACGGCAACTTT-ACTGTGAAAACCACTTTAAGGTGACACTGATACTGGTACTCAA  
195 CCAGCACGGCAACTTT-ACTGTGAAAACCACTTTAAGGTGACACTGATACTGGTACTCAA  
169 CCAGCACGGCAACTTT-ACTGTGAAAACCACTTTAAGGTGACACTGACACTGGTACTCAA  
170 CCAGCACGGCAACTTT-ACTGTGAAAACCACTTTAAGGTGACACTGACACTGGTACTCAA  
196 CCAGCACGGCAGCTTT-ACTGTGAAAACCACTTTAAGGTGACACTGATACTGGTACTCAA  
197 CCAGCACGGCAGCTTT-ACTGTGAAAACCACTTTAAGGTGACACTGATACTGGTACTCAA  
231 CCAGCACGGCAACTTT-ACTGTGAAAACCACTTTAAGGTGACACTGATACTGGTACTCAG  
232 CCAGCACGGCAGCTCT-ACTGTGAAAACCACTTTAAGGTGACACTGATACTGGTACTCAG  
230 CCAGCACGGCAACTTT-ATTGTGAAAACCACTTTAAGGTGACACTGATACTGGTACTCAA  
233 CCAGCACGGCAGCTCT-ACTGTGAAAACCACTTTAAGGTGACACTGATACTGGTACTCAG  
234 CCAGCACGGCAGCTCT-ACTGTGAAAACCACTTTAAGGTGACACTGATACTGGTACTCAA  
235 CCAGCACGGCAACTTT-ACTGTGAAAACCACTTTAAGGTGACACTGATACTGGTACTCAG  
229 CCAGCACGGCAGCTTT-GCTGAGAAAACCACTTTAAGGTGACACTGATACTGGTACTCAA  
265 CCAGCACGGCAACTT-ACTGTGAAAACCACTTTAAGGTGACACTGAAACTGGTACTCAA  
282 CCGGCACGGCAACTTT-ACTATGAACACCACTTTAAGGTGACACTGAAACTGGTACTCAA  
256 CCAGCACGGCAGCTTT-GCTGAGAAAACCACTTTAAGGTGACACTGAAACTGGTACTCAA  
49 CCAGCACAGCAACTTT-ACTGCGAAAAGCCACTTTAAGGTGACACTGATACTGGTACTCAA  
50 CCAGCACAGCAACTTT-ACTGCGAAAAGTCACTCTAAGGTGACACTGATACTGGTATTCAA  
48 CCAGCACAGCAACTTT-ACTGCGAAAAGCCACTTTAAGGTGACACTGATACTGGTACTCAA  
63 CCAGCACAGCAACTTT-ACTGTGAAAACCACTTTAAGGTGACACTGATACTGGTACTCAA  
104 CCAGCACGGCAACTTT-ACTGTGAAAACCACTTTAAGGTGACACTGATACTGGTACTCAA  
93 CCAGCACGGCAGCTTT-ATTATGAAAACCACTTTAAGGTGACACTGATACTGGTACCCAA  
94 CCAGCACGGCAGCTTT-ATTATGAAAACCACTTTAAGGTGACACTGATACTGGTACTCAA  
92 CCAGCACGGCAACTTT-ACTGTGAAAACCACTTTAAGGTGACACTGATACTGGTACCCAA

167 CCAGCACGGCAACTTT-ACTGTGAAAACCACCTTAAGGTGACACTGACACTGGTACTCAG  
168 CCAGCACAACAACCTTT-TCTGTGAAAACCACCTTTAAGGTGACACTGACACTGGTACTCAA  
64 CCAGCACAGCAACTTT-ACTGCGAAAGCCACTTTAAGGTGACACTGATACTGGTACTCAA  
181 CCAGCACGGCAACTTT-ACTGCGAAACCCTTTAAGGTGACACTGATAATGGTACCCAA  
141 CCAGCACGGCAACTTT-ACTGTGAAAACCCTTTAAGGTGACACTGATACTGGTACTCAA  
152 CCAGCACGGCAACTTT-ACTGTGAAAACCCTTTAAGGTGACACTGATACTGGTACTCAA  
144 CCAGCACGGCAACTTT-ACTGTGAAAACCCTTTAAGGTGACACTGATACTGGTACTCAA  
150 CCAGCACGGCAACTTT-ACTGTGAAAACCCTTTAAGGTGACACTGATACTGGTACTCAA  
151 CCAGCACGGCAACTTT-ACTGTGAAAACCCTTTAAGGTGACACTGATACTGGTACTCAA  
145 CCAGCACGGCAGCTTT-ATTATGAAAACCCTTTAAGGTGACACTGATACTGGTACTCAA  
156 CCAGCACGGCAGCTTT-ATTATGAAAACCCTTTAAGGTGACACTGATACTGGTACTCAT  
148 CCAGCACGGCAACTTT-ACTGTGAAAACCCTTTAAGGTGACACTGATACTGGTACTCAA  
143 CCAGCACGGCAACTTT-ACTGTGAAAACCCTTTAAGGTGACACTGATACTGGTACTCAA  
155 CCAGCACGGCAACTTT-ACTGTGAAAACCCTTTAAGGTGACACTGATACTGGTACTCAA  
154 CCAGCACGGCAACTTT-ACTGTGAAAACCCTTTAAGGTGACACTGATACTGGTACTCAA  
189 CCAGCACGGCAACTTT-ACTGTGAAAACCCTTTAAGGTGACACTGATACTGGTACTCAA  
142 CCAGCACGGCAACTTT-ACTGTGAAAACCCTTTAAGGTGACACTGATACTGGTACTCAA  
153 CCAGCACGGCAACTTT-ACTGTGAAAACCCTTTAAGGTGACACTGATACTGGTACTCAA  
190 CCAGCACGGCAACTTT-ACTGTGAAAACCCTTTAAGGTGACACTGATACTGGTACTCAA  
99 CCAGCACGGCAACTTT-ACTGTGAAAATCCTTTAAGGTGACACTGATACTGGTACTCAA  
191 CCAGCACGGCAACTTT-ACTGTGAAAACCCTTTAAGGTGACACTGATACTGGTACTCAA  
192 CTGGCACGGCAACTTT-ACTGTGAAAACCCTTTAAGGTGACACTGATACTGGTACTCAA  
160 CCAGCACGGCAACTTT-ACTGTGAAAACCCTTTAAGGTGACACTGATACTGGTACTCAA  
180 CCAGCACGGCAACTTT-ACTGTGAAAACCCTTTAAGGTGACACTGATACTGGTACTCAA  
213 CCAGCACGGCAACTTT-ACTGTGAAAACCCTTTAAGGTGACACTGATACTGGTACTCAA  
100 CCGGCACGGCAGCTTT-TCTGTGAAACTCACTTCAAGGTGACACTGATACTGGTACTCAA  
101 CCAGCACGGCAACTTT-TCTGTGAAAACCCTTTAAGGTGACACTGATACTGGTACTCAA  
146 CCAGCACGGCAACTTT-ACTGTGAAAACCCTTTAAGGTGACACTGATACTGGTACTCAA  
157 CCAGCACGCAACTTT-ACTGCGAAAACCCTTTAAGGTGACACTGATACTGGTACTCAA  
162 CCAGCACGGCAACTTT-ACTGTGAAAACCCTTTAAGGTGACACTGATACTGGTACTCAA  
182 CCAGCACGGCAACTTT-GTTGTGAAAACCCTTTAAGGTGACACTGATACTGGTACTCAA  
183 CCAGCACGGCAACTTT-ACTGCGAAAACCCTTTAAGGTGACACTGATACTGGTACTCAA  
102 CCAGCACGGCAACTTT-TCTGGGAAAACCCTTTAAGGTGACACTGATACTGGTACTCAA  
161 CCAGCACGGCAGCTTT-ATTATGAAAACCCTTTAAGGTGACACTGATACTGGTACTCAA  
193 CCAGCACGGCAACTTT-ACTGTGAAAATCCTTTAAGGTGACACTGATACTGGTACTCAA  
227 CCAGCACGGCAACTTT-ACTGTGAAAACCCTTTAAGGTGACACTGATACTGGTACTCAG  
254 CCGGCACGGCAACTTT-GTTGTGAAAAGCCACTTTAAGGTGACACTGATACTGGTACTCAA  
214 CCAGCACGGCAACTTT-TCCGCGAAAACCCTTTAAGGTGAAACTGATACTGGTACTCAA  
179 CCAGCACGGCAACTTT-ACTGTGAAAACCCTTTAAGGTGACACTGATACTGGTACTCAA  
212 CCAGCACGGCAGCTTT-ACTGTGAAAACCCTTTAAGGTGACACTGATACTGGTACTCAA  
241 CCAGCACAGCAACTTT-ACTGTGAAAAGCCACTTTAAGGTGACACTGATACTGGTACTCAA  
210 CCAGCACGGCAACTTT-ACTGTGAAAAGCCACTTTAAGGTGACACTGATACTGGTACTCAA  
223 CCAGCACGGCAACTTT-ACTGTGAAAAGCCACTTTAAGGTGACACTGACACTGGTACTCAA  
239 CCAGCACGGCAACTTT-ACCACGAAAATCACTTTAAGGTGACACTGATACTGGTACTCAA  
262 CCAGCACGGCAGCTTT-GTCACGAAAACCCTTTAAGGTGACACTGATACTGGTACTCAA  
240 CCAGCACGGCAACTTT-GCTGCGAAAACCCTTTAAGGTGACACTGATACTGGTACTCAA  
284 CCAGCACGGCAACTTTACTGCGAACACCCTTTAAGGTGACACTGATACTGGTACTCAA  
251 CCAGCACGGCAACTTT-ACTGTGAAAACCCTTTAAGGTGACACTGATACTGGTACTCAA  
263 CCAGCACGGCAACTTT-GCTGCGAAAACCCTTTAAGGTGACACTGATACTGGTACTCAA  
250 CCAGCACGGCAACTTT-GACACGAAAACCCTTTAAGGTGACACTGATACTGGTACTCAA  
224 CCAGCACGGCAACTTT-ACTGTGAAAAGCCACTTTAAGGTGACACTGATACTGGTACTCAA  
237 CCAGCACGGCAGCTTC-ATTATGAAAACCCTTTAAGGTGACACTGAAACTGGTACTCAA  
281 CCAGCACGGCAGCTTT-GCTGAGAAAATCACTTTAAGGTGACACTGAAACTGGTACTCAA  
221 CCAGCACGGCAACTTT-ACTGCGAAAACCCTTTAAGGTGACACTGATACTGGTACTCAA  
226 CCAGCACAGCAACTTT-ACTGTGAAAAGCCACTTTAAGGTGACACTGATACTGGTACTCAA  
253 CCAGCACGGCAGTTT-ACTGTGAAAACCCTTTAAGGTGACACTGATACTGGTACCCAA  
286 CCAGCACGGCAACTTT-ACTGCGAACACCCTTTAAGGTGACACTGAAACTGGTACTCAA  
279 CCAGCACGGCAACTTT-ACTGTGAAAACCCTTTAAGGTGACACTGATACTGGTACTCAG  
287 CCAGCACGGCAACTTT-ACCACGAAAACCCTTTAAGGTGACACTGATACTGGTACTCGG  
267 CCAGCACGGCAACTTT-ACCACGAAAACCCTTTAAGGTGACACTGATACTGGTACTCAA  
291 CCAGCACGGCAACCAT-ACTACGAAAACCCTTTAAGGTGACACTGATACTGGTACTCAA  
301 CCAGCACGGCAACTTT-ACTGCGAACACCCTTTAAGGTGACACTGATACTGGTACTCAA

269 CCAGCACGGCAACTTT-ACTGCGAAAACCACTTTAAGGTGACACTGAACTGGTACTCAA  
289 CCAGCACGGCAGCTTT-GTTGTGAAAACCACTTTAAGGTGACACTGGTACTGGTACTCAA  
302 CCAGCACGGCAACTTT-ACTGCGAAAACCCCTTGAAGGTGACACTGATACTGGTACTCAA  
274 CCAGCACGGCAACTTTTACTGCGAACACCACCTTTAAGGTGACACTGATACTGGTACTCAA  
275 CCAGCACGGTAACCTTT-ACTGTGAAAACCACTTTAAGGTGACACTGATACTGGTACTCAA  
297 CCAGCACGGCAACTTT-ACTNNNAACCACTTTAAGGTGACACTGAACTGGTACTCAA  
304 CCAGCACGGCAACTTT-ACTGCGAACACCACCTTTAAGGTGACACTGAACTGGTACTCAA  
270 CCAGCACGGCAACTTT-ACCACGAAAACCACTTTAAGGTGACACTGAACTGGTACTCAA  
298 CCAGCACGGCAACTTT-ACCACGAAAACCACTTTAAGGTGACACTGATACTGGTACTCAA  
283 CCAGCACGGCAACTTT-ATCAGGAAAACCACTTTAAGGTGACACTGGTACTGGTACTCGG  
300 CCAGCACGGCAACTTT-ACCACGAAAACCACTTTAAGGTGACACTGGTACTGGTACTCGT  
271 CCAGCACGGCAACTTT-ACCACGAAAACCACTTTAAGGTGACACTGGTACTGGTACTCGG  
272 CCAGCACGGCAACTTTTACTGCGAACACCACCTTTAAGGTGACACTGGTACTGGTACTCGG  
273 CCAGCACGGCAACTTTTACTGCGAACACCACCTTTAAGGTGACACTGGTACTGGTACTCGG  
285 CCAGCACGGCAACTTT-TACTGTGAAAACCACTTTAAGGTGACACTGGTACTGGTACTCGG  
303 CCCGCACGGCAACTTTA-ACTGTGAAACCACTTTAAGGTGACACTGATACTGGTACTCGG  
309 CCAGCACGGCAACTTT-ATCGTGAACACCACCTTTAAGGTGACACTGATACTGGTACTCAA  
312 CCAGCACGGCAACTTT-GCCACGAAAACCACTTTAAGGTGACACTGAGACTGGTACTTGG  
313 CCAGCACGGTGACACT-GTTGTGAAACACACTTTAAGGTGACACTGAGACTGGTACTTGG  
316 CCAGCACGGCAACTTT-GTTGTGAAACACACTTTAAGGTGACACTGAGACTGGTACTTGG  
318 CCAGCACGGCAACTTT-GTTGTGAAACACACTTTAAGGTGACACTGAGACTGGTACTTGG  
314 CCAGCACGGCAACTTT-GTTGTGAAACCACTTTAAGGTGACACTGAGACTGGTACTTGG  
315 CCAGCACGGCAACTTTG-TTTGTGAAACACACTTTAAGGTGACACTGAGACTGGTACTTGG  
317 CCAGCACGGTAATACT-GTCATGAAACACACTTTAAGGTGACACTGAGACTGGTACTTGG  
  
310 ATACTGGTGACAGGCTAAGGATGCCCTTCAGGTACCCCGAGGTAACACGGCACACTTGGG  
311 ATACTGGTGACAGGCTAAGGATGCCCTTCAGGTACCCCGAGGTAACAAGAGACACTCGGG  
307 TCACTGGTGACAGACTAAGGATGCCCTTCAGGTACCCCAAGGTAACAAGAGACACTTGGG  
308 ACGCTGGTGACAGGCTAAGGATGCCCTTCAGGTACCCCGAGGTAACACGGGACACTTGGG  
306 TCACTGGTGACAGGCTAAGGATGCCCTTCAGGTACCCCGAGGTAACACGGGACACTCGGG  
276 TCACTGGTGACAGGCTAAGGATGCCCTTCAGGTACCCCGAGGTAACACGGGACACTCGGG  
277 TCACTGGTGACAGGCTAAGGATGCCCTTCAGGTACCCCGAGGTAACATGCGACACTCGGG  
278 CCACTGGTGACAGGCTAAGGATGCCCTTCAGGTACCCCGAGGTAACAAGCGACACTCGGG  
288 TCACTGGTGACAGGCTAAGGATGCCCTTCAGGTACCCCGAGGTAACACGGGACACTCGGG  
305 CCACTGGTGACAGGCTAAGGATGCCCTTCAGGTACCCCGAGGTAACACGTGACACTCGGG  
290 CCACTGGTGACAGGCTAAGGATGCCCTTCAGGTACCCCGAGGTAACACGGGACACTCGGG  
292 CCACTGGTGACAGGCTAAGGATGCCCTTCAGGTACCCCGAGGTAACATGTGACACTCGGG  
244 TCACTGGTGACAGGCTAAGGATGCCCTTCAGGTACCCCGAGGTAACAAGCGACACTCGGG  
257 TCACTGGTGACAGGCTAAGGATGCCCTTCAGGTACCCCGAGGTAACAAGCGACACTCGGG  
299 TCACTGGTGACAGGCTAAGGATGCCCTTCAGGTACCCCGAGGTAACAAGCGACACTCGGG  
245 CCACTGGTGACAGGCTAAGGATGCCCTTCAGGTACCCCGAGGTAACAAGCGACACTCGGG  
258 TCACTGGTGACAGGCTAAGGATGCCCTTCAGGTACCCCGAGGTAACAAGCGACACTCGGG  
236 ACCTGGTGACAGGCTAAGGATGCCCTTCAGGTACCCCGAGGTAACACGGGACACTCAGG  
246 TCACTGGTGACAGGCTAAGGATGCCCTTCAGGTACCCCGAGGTAACACGGGACACTCAGG  
259 GCCTGGTGACAGGCTAAGGATGCCCTTCAGGTACCCCGAGGTAACACGGGACACTCAGG  
268 CCACTGGTGACAGGCTAAGGATGCCCTTCAGGTACCCCGAGGTAACACGGGACACTCGGG  
280 TCACTGGTGACAGGCTAAGGATGCCCTTCAGGTACCCCGAGGTAACAAGCGACACTCGGG  
247 CCACTGGTGACAGGCTAAGGATGCCCTTCAGGTACCCCGAGGTAACACGGGACACTCGGG  
220 CCACTGGTGACAGGCTAAGGATGCCCTTCAGGTACCCCGAGGTAACACGGGACACTCGGG  
222 CCACTGGTGACAG-CTAAGGATGCCCTTCAGGTACCCCGAGGTAACACGGGACACTCGGG  
238 CCACTGGTGACAGGCTAAGGATGCCCTTCAGGTACCCCGAGGTAACACGGGACACTCGGG  
248 ACCTGGTAACAGGCTAAGGATGCCCTTCAGGTACCCCGAGGTAACACGGGACACTCGGG  
261 TCACTGGAGACAGGCTAAGGATGCCCTTCAGGTACCCCGAGGTAACACGGGACACTCGGG  
249 ACCTGGTGACAGGCTAAGGATGCCCTTCAGGTACCCCGAGGTAACACGGGACACTCGGG  
293 CCACTGGTGACAGGCTAAGGATGCCCTTCAGGTACCCCGAGGTAACAAGCGACACTCGGG  
294 CCACTGGTGACAGACTAAGGATGCCCTTCAGGTACCCCGAGGTAACATGCGACACTCGGG  
295 CCACTGGTGACAGGCTAAGGATGCCCTTCAGGTACCCCGAGGTAACACGGGACACTCGGG  
296 CCACTGGTGACAGGCTAAGGATGCCCTTCAGGTACCCCGAGGTAACAAGCGGACACTCGGG  
260 CCACTGGTGACAGGCTAAGGATGCCCTTCAGGTACCCCGAGGTAACACGGGACACTCGGG  
61 ACCTGGTGACAGGCTAAGGATGCCCTTCAGGTACCCCGAGGTAACACGGGACACTCGGG  
132 CCACTGGTGACAGGCTAAGGATGCCCTTCAGGTACCCCGAGGTAACACGGGACACTCGGG  
125 CCACTGGTGACAGGCTAAGGATGCCCTTCAGGTACCCCGAGGTAACACGGGACACTCGGG

126 TCACTGGTGACAGGCTAAGGATGCCCTTCAGGTACCCCGAGGTAACACGCGACTCGGG  
 173 CCACTGGTGACAGGCTAAGGATGCCCTTCAGGTACCCCGAGGTAACAAGCGACTCGGG  
 204 CCACTGGTGACAGGCTAAGGATGCCCTTCAGGTACCCCGAGGTAACGAGCGACTCGGG  
 174 AACTGGTGACAGGCTAAGGATGCCCTTCAGGTACCCCGAGGTAACAAGCGACTCGGG  
 175 AACTGGTGACAGGCTAAGGATGCCCTTCAGGTACCCCGAGGTAACAAGCGACTCGGG  
 205 AACTGGTGACAGGCTAAGGATGCCCTTCAGGTACCCCGAGGTAACAAGCGACTCGGG  
 127 CCACTGGTGACAGGCTAAGGATGCCCTTCAGGTACCCCGAGGTAACACGCGACTCGGG  
 218 CCACTGGTGACAGGCTAAGGATGCCCTTCAGGTACCCCGAGGTAACAAGCGACTCGGG  
 217 CCACTGGT-ACAGGCTAAGGATGCCCTTCAGGTACCCCGAGGTAACACGCGACTCGGG  
 133 CCACTGGTGACAGGCTAAGGATGCCCTTCAGGTACCCCGAGGTAACACGCGACTCGGG  
 225 CCACTGGTGACAGGCTAAGGATGCCCTTCAGGTACCCCGAGGTAACACGCGACTCGGG  
 228 TCACTGGTGACAGGCTAAGGATGCCCTTCAGGTACCCCGAGGTAACAAGCGACTCGGG  
 255 TCACTGGTGACAGGCTAAGGATGCCCTTCAGGTACCCCGAGGTAACACGCGACTCGGG  
 266 CCACTGGTGACAGGCTAAGGATGCCCTTCAGGTACCCCGAGGTAACAAGCGACTCGGG  
 1 AACTGGTGACAGGCTAAGGATGCCCTTCAGGTACCCCGAGGTAACACGCGACTCGGG  
 2 AACTGGTGACAGGCTAAGGATGCCCTTCAGGTACCCCGAGGTAACACGCGACTCGGG  
 3 AACTGGTGACAGGCTAAGGATGCCCTTCAGGTACCCCGAGGTAACACGCGACTCGGG  
 4 AACTGGTGACAGGCTAAGGATGCCCTTCAGGTACCCCGAGGTAACAAGCGACTCGGG  
 5 ATACTGGTGACAGGCTAAGGATGCCCTTCAGGTACCCCGAGGTAACACGAGACTCGGG  
 7 ATACTGGTGACAGGCTAAGGATGCCCTTCAGGTACCCCGAGGTAACACGAGACTCGGG  
 9 ATACTGGTGACAGGCTAAGGATGCCCTTCAGGTACCCCGAGGTAACATGAGACTCGGG  
 6 TCACTGGTGACAGGCTAAGGATGCCCTTCAGGTACCCCGAGGTAACAAGCGACTCGGG  
 8 TCACTGGTGACAGGCTAAGGATGCCCTTCAGGTACCCCGAGGTAACAAGCGACTCGGG  
 10 TCACTGGTGACAGGCTAAGGATGCCCTTCAGGTACCCCGAGGTAACACGCGACTCGGG  
 12 ATACTGGTGACAGGCTAAGGATGCCCTTCAGGTACCCCGAGGTAACACGCGACTCGGG  
 11 GCACTGGTGACAGGCTAAGGATGCCCTTCAGGTACCCCGAGGTAACATGCGACTCGGG  
 13 ATACTGGTGACAGGCTAAGGATGCCCTTCAGGTACCCCGAGGTAACACGCGACTCGGG  
 22 AACTGGTGACAGGCTAAGGATGCCCTTCAGGTACCCCGAGGTAACATGCGACTCGGG  
 23 AACTGGTGACAGGCTAAGGATGCCCTTCAGGTACCCCGAGGTAACACGCGACTCGGG  
 18 ATACTGGTGACAGGCTAAGGATGCCCTTCAGGTACCCCGAGGTAACATGCGACTCGGG  
 19 ATACTGGTGACAGGCTAAGGATGCCCTTCAGGTACCCCGAGGTAACACGCGACTCGGG  
 14 ATACTGGTGACAGGCTAAGGATGCCCTTCAGGTACCCCGAGGTAACACGCGTCACTCGGG  
 30 ATACTGGTGACAGGCTAAGGATGCCCTTCAGGTACCCCGAGGTAACACGCGACTCGGG  
 24 ATACTGGTGACAGGCTAAGGATGCCCTTCAGGTACCCCGAGGTAACACGCGACTCGGG  
 35 GCACTGGTGACAGGCTAAGGATGCCCTTCAGGTACCCCGAGGTAACACGCGAACTCGGG  
 31 AACTGGTGACAGGCTAAGGATGCCCTTCAGGTACCCCGAGGTAACACGCGACTCGGG  
 36 AACTGGTGACAGGCTAAGGATGCCCTTCAGGTACCCCGAGGTAACACGCGACTCGGG  
 15 AACTGGTGACAGGCTAAGGATGCCCTTCAGGTACCCCGAGGTAACACGCGTCACTCGGG  
 21 AACTGGAGACAGGCTAAGGATGCCCTTCAGGTACCCCGGGTAACACGCGACCCGGG  
 20 AACTGGAGACAGGCTAAGGATGCCCTTCAGGTACCCCGAGGTAACACGCGACTCGGG  
 27 ATACTGGTGACAGGCTAAGGATGCCCTTCAGGTACCCCGAGGTAACACGCGACTCGGG  
 16 AACTGGTGACAGGCTAAGGATGCCCTTCAGGTACCCCGAGGTAACAAGCGACTCGGG  
 17 AACTGGTGACAGGCTAAGGATGCCCTTCAGGTACCCCGAGGTAACATGCGACTCGGG  
 79 TCACTGGTGACAGGCTAAGGATGCCCTTCAGGTACCCCGAGGTAACAAGCGACTCGGG  
 32 AACTGGTTACAGGCTAAGGATGCCCTTCAGGTACCCCGAGGTAACACGCGACTCGGG  
 33 ATACTGGCGACAGGCTAAGGATGCCCTTCAGGTACCCCGAGGTAACACGTGACTCGGG  
 37 ATACTGGTGACAGGCTAAGGATGCCCTTCAGGTACCCCGAGGTAACACGCGACTCGGG  
 25 AACTGGTGACAGGCTAAGGATGCCCTTCAGGTACCCCGAGGTAACACGCGTCACTCGGG  
 26 AACTGGTGACAGGCTAAGGATGCCCTTCAGGTACCCCGAGGTAACACGCGACTCGGG  
 38 TCACTGGTGACAGGCTAAGGATGCCCTTCAGGTACCCCGAGGTAACACGCGCCACTCGGG  
 28 ATACTGGTGACAGGCTAAGGATGCCCTTCAGGTACCCCGAGGTAACACGCGACTCGGG  
 34 GCACTGGTGACAGGCTAAGGATGCCCTTCAGGTACCCCGAGGTAACACGTGACTCGGG  
 29 AACTGGTGACAGGCTAAGGATGCCCTTCAGGTACCCCGAGGTAACATGCGACTCGGG  
 39 AACTGGTGACAGGCTAAGGATGCCCTTCAGGTACCCCGAGGTAACAAGCGACTCGGG  
 40 AACTGGTGACAGGCTAAGGATGCCCTTCAGGTACCCCGAGGTAACAAGCGACTCGGG  
 58 GTGCTGGTGACAGGCTAAGGATGCCCTTCAGGTACCCCGAGGTAACACGTGACTCGGA  
 59 GTGCTGGTGACAGGCTAAGGATGCCCTTCAGGTACCCCGAGGTAACACGCGACTCGGG  
 81 GTGCTGGTGACAGGCTAAGGATGCCCTTCAGGTACCCCGAGGTAACATGCGACTCGGG  
 82 GTGCTGGTGACAGGCTAAGGATGCCCTTCAGGTACCCCGAGGTAACATGCGACTCGGG  
 83 GTGCTGGTGACAGGCTAAGGATGCCCTTCAGGTACCCCGAGGTAACATGCGACTCGGG  
 84 GTGCTGGTGACAGGCTAAGGATGCCCTTCAGGTACCCCGAGGTAACATGCGACTCGGG  
 130 GTGCTGGTGACAGGCTAAGGATGCCCTTCAGGTACCCCGAGGTAACATGCGACTCGGG







256 CCACTGGTGACAGGCTAAGGATGCCCTTCAGGTACCCCGAGGTAACACGCGACTCGGG  
49 CCACTGGTGACAGGCTAAGGATGCCCTTCAGGTACCCCGAGGTAACACGCGACTCGGG  
50 GTACTGGTGACAGGCTAAGGATGCCCTTCAGGTACCCCGAGGTAACAAGCGACTCGGG  
48 CCACTGGTGACAGGCTAAGGATGCCCTTCAGGTACCCCGAGGTAACATGCGACTCGGG  
63 CCACTGGTGACAGGCTAAGGATGCCCTTCAGGTACCCCGAGGTAACACGCGACTCGGG  
104 CCACTGGTGACAGGCTAAGGATGCCCTTCAGGTACCCCGAGGTAACAAGCGACTCGGG  
93 AACTGGTGACAGGCTAAGGATGCCCTTTCAGGTACCCGAGGTAACACGCGACTCGGG  
94 CCACTGGTGACAGGCTAAGGATGCCCTTCAGGTACCCCGAGGTAACAAGCGACTCGGG  
92 AACTGGTGACAGGCTAAGGATGCCCTTCAGGTACCCCGAGGTAACACGCGACTCGGG  
167 AACTGGTGACAGGCTAAGGATGCCCTTCAGGTACCCCGAGGTAACAAGCGACTCGGG  
168 AACTGGTGGCAGGCTAAGGATGCCCTTCAGGTACCCCGAGGTAACAAGCGACTCGGG  
64 AACTGGTGGCAGGCTAAGGATGCCCTTCAGGTACCCCGAGGTAACAAGCGACTCGGG  
181 AACTGGTGACAGGCTAAGGATGCCCTTCAGGTACCCCGAGGTAACACGCGACTCGGG  
141 TCACTGGTGACAGGCTAAGGATGCCCTTTCAGGTACCCGAGGTAACACGCGACTCGGG  
152 CCACTGGTGACAGGCTAAGGATGCCCTTTCAGGTACCCGAGGTAACACGCGACTCGGG  
144 AACTGGCAGCAGGCTAAGGATGCCCTTTCAGGTACCCGAGGTAACACGCGACTCGGG  
150 TCACTGGTGACAGGCTAAGGATGCCCTTTCAGGTACCCGAGGTAACACGCGACTCGGG  
151 CCACTGGTGACAGGCTAAGGATGCCCTTTCAGGTACCCGAGGTAACACGCGACTCGGG  
145 CCACTGGTGACAGGCTAAGGATGCCCTTTCAGGTACCCGAGGTAACACGCGACTCGGG  
156 AACTGGTGACAGGCTAAGGATGCCCTTTCAGGTACCCGAGGTAACACGCGACTCGGG  
148 CCACTGGTGACAGGCTAAGGATGCCCTTTCAGGTACCCGAGGTAACACGCGACTCGGG  
143 CCACTGGTGACAGGCTAAGGATGCCCTTCAGGTACCCCGAGGTAACACGCGACTCGGG  
155 AACTGGTGACAGGCTAAGGATGCCCTTCAGGTACCCCGAGGTAACACGCGACTCGGG  
154 CCACTGGTGACAGGCTAAGGATGCCCTTCAGGTACCCCGAGGTAACACGCGACTCGGG  
189 CCACTGGTGACAGGCTAAGGATGCCCTTCAGGTACCCGAGGTAACACGCGACTCGGG  
142 CCACTGGTGACAGGCTAAGGATGCCCTTTCAGGTACCCGAGGTAACACGCGACTCGGG  
153 CCACTGGTGACAGGCTAAGGATGCCCTTTCAGGTACCCGAGGTAACACGCGACTCGGG  
190 CCACTGGTGACAGGCTAAGGATGCCCTTCAGGTACCCCGAGGTAACACGCGACTCGGG  
99 AACTGGAGACAGGCTAAGGATGTCCTTCAGGTACCCCGAGGTAACACGCGACTCGGG  
191 CCACTGGTGACAGGCTAAGGATGCCCTTCAGGTACCCCGAGGTAACACGCGACTCGGG  
192 CCACTGGTGACAGGCTAAGGATGCCCTTCAGGTACCCCGAGGTAACACGCGACTCGGG  
160 AACTGGTGACAGGCTAAGGATGCCCTTCAGGTACCCGAGGTAACACGCGACTCGGG  
180 CCACTGGTGACAGGCTAAGGATGCCCTTCAGGTACCCCGAGGTAACACGCGACTCGGG  
213 ACGTGGTGACAGGCTAAGGATGCCCTTCAGGTACCCCGAGGTAACACGCGACTCGGG  
100 ATACTGGTGGCAGGCTAAGGATGCCCTTCAGGTACCCCGAGGTAACACGCGACTCGGG  
101 ATACTGGTGGCAGGCTAAGGATGCCCTTCAGGTACCCGAGGTAACACGCGACTCGGG  
146 CCACTGGTGACAGGCTAAGGATGCCCTTTCAGGTACCCGAGGTAACACGCGACTCGGG  
157 CCACTGGTGACAGGCTAAGGATGCCCTTTCAGGTACCCGAGGTAACACGCGACTCGGG  
162 TCACTGGTGACAGGCTAAGGATGCCCTTCAGGTACCCCGAGGTAACAAGCGACTCGGG  
182 CCACTGGTGACAGGCTAAGGATGCCCTTCAGGTACCCCGAGGTAACATGCGACTCGGG  
183 CCACTGGTGACAGGCTAAGGATGCCCTTTCAGGTACCCGAGGTAACACGCGACTCGGG  
102 CCACTGGTGACAGGCTAAGGATGCCCTTCAGGTACCCGAGGTAACACGCGACTCGGG  
161 CCACTGGTGACAGGCTAAGGATGCCCTTCAGGTACCCCGAGGTAACAAGCGACTCGGG  
193 CCACTGGTGACAGGCTAAGGATGCCCTTCAGGTACCCCGAGGTAACAAGCGACTCGGG  
227 AACTGGTGACAGGCTAAGGATGCCCTTCAGGTACCCCGAGGTAACAAGTGACTCGGG  
254 CCACTGGTGACAGGCTAAGGATGCCCTTCAGGTACCCCGAGGTAACAAGTGACTCGGG  
214 CCACTGGTGACAGGCTAAGGATGCCCTTCAGGTACCCCGAGGTAACACGCGACTCGGG  
179 CCACTGGTGACAGGCTAAGGATGCCCTTCAGGTACCCCGAGGTAACAAGTGACTCGGG  
212 TCACTGGTGACAGGCTAAGGATGCCCTTCAGGTACCCCGAGGTAACACGCGACTCGGG  
241 CCACTGGTGACAGGCTAAGGATGCCCTTCAGGTACCCCGAGGTAACAAGCGACTCGGG  
210 CCACTGGTGACAGGCTAAGGATGCCCTTCAGGTACCCGAGGTAACACGCGACTCGGG  
223 CCACTGGTGACAGGCTAAGGATGCCCTTCAGGTACCCGAGGTAACACGCGACTCGGG  
239 CCACTGGTGACAGGCTAAGGATGCCCTTCAGGTACCCCGAGGTAACACGCGACTCGGG  
262 TCACTGGTGACAGGCTAAGGATGCCCTTCAGGTACCCCGAGGTAACAAGTGACTCGGG  
240 CCACTGGTGACAGGCTAAGGATGCCCTTCAGGTACCCCGAGGTAACACGCGACTCGGG  
284 CTACTGGTGGCAGGCTAAGGATGCCCTTCAGGTACCCCGAGGTAACACGCGACTCGGG  
251 TCACTGGTGACAGGCTAAGGATGCCCTTCAG- TACCCCGAGGTAACACGCGACTCGGG  
263 TCACTGGTGACAGGCTAAGGATGCCCTTCAGGTACCCCGAGGTAACACGCGACTCGGG  
250 CCACTGGTGACAGGCTAAGGATGCCCTTCAGGTACCCGAGGTAACACGCGACTCGGG  
224 TCACTGGTGACAGGCTAAGGATGCCCTTCAGGTACCCCGAGGTAACATGCGACTCGGG  
237 CCACTGGTGACAGGCTAAGGATGCCCTTCAGGTACCCCGAGGTAACACGCGACTCGGG  
281 AACTGGTGACAGCTAAGGATGCCCTTCAGGTACCCCGAGGTAACACGCGACTCGGG

221 CCACTGGTGACAGGCTAAGGATGCCCTTCAGGTACCCCGAGGTAACACGCGACTTGGG  
226 CCACTGGCGACAGGCTCCGGATGCCCTTCAGGTACCCCGAGGTAACACGCGACTCGGG  
253 CCACTGGTGACAGGCTAAGGATGCCCTTCAGGTACCCCGAGGTAACACGCGACTCGGG  
286 CCACTGGTGACAGGCTAAGGATGCCCTTCAGGTACCCCGAGGTAACACGGGACTCGGG  
279 TCACTGGTGACAGGCTAAGGATGCCCTTCAGGTACCCCGAGGTAACAAGTGACTCGGG  
287 TCACTGGTGACAGACTAAGGATGCCCTTCAGGTACCCCGAGGTAACAAGTGACTCGGG  
267 CCACTGGTGGCAGGCTAAGGATGCCCTTCAGGTACCTCGAGGTAACACGCGACTCGAG  
291 CCACTGGTGACAGGCTAAGGATGCCCTTCAGGTACCCCGAGGTAACACGCGACTCGGG  
301 CCACTGGTGACAGGCTAAGGATGCCCTTCAGGTACCCCGAAGTAACACGCGAAACTCGGG  
269 CCACTGGTGACAGGCTAAGGATGCCCTTCAGGTACCCCGAGGTAACACGCGACTCGAGG  
289 CCACTGGTGGCAGGCTAAGGATGCCCTTCAGGTACCCCGAGGTAACACGCGACTCGGG  
302 CCACTGGTGACAGGCTAATGATGCCCTTCAGGTACCCCGAGGTAACACGGGACTCGGG  
274 CCACTGGTGACAGGCTAAGGATGCCCTTCAGGTACCCCGAGGTAACACGCGACTCGGG  
275 CCACTGGTGACAGGCTAAGGATGCCCTTCAGGTACCCCGAGGTAACACGCGACTCGGG  
297 CCACTGGTGACAGACTAAGGATGCCCTTCAGGTACCCCGAGGTAACACGCGACTCGGG  
304 CCACCGTGACAGATTAAGGATGCCCTTCAGGTACCCCGAGGTAACACGCGACTCGGG  
270 CCACTGGTGACAGGCTAAGGATGCCCTTCAGGTACCCCGAGGTAACACGGGACTCGGG  
298 TCACTGGTGACAGGCTAAGGATGCCCTTCAGGTACCCCGAGGTAACATGCGACTCGGG  
283 TCACTGGTGACAGGCTAAGGATGCCCTTCAGGTACCCCGAGGTAACACGCGACTCGGG  
300 TCACTGGTGACAGGCTAAGGATGCCCTTCAGGTACCCCGAGGTAACACGCGACTCGGG  
271 TCACTGGTGACAGGCTAAGGATGCCCTTCAGGTACCCCGAGGTAACACGGGACTCGGG  
272 TCACTGGTGACAGGCTAAGGATGCCCTTCAGGTACCCCGAGGTAACACGGGACTCGGG  
273 TCACTGGTGACAGGCTAAGGATGCCCTTCAGGTACCCCGAGGTAACACGCGACTCGGG  
285 TCACTGGTGACAGGCTAAGGATGCCCTTCAGGTACCCCGAGGTAACACGCGACTCGGG  
303 TCACTGGTGACAGACTAAGGATGCCCTTCAGGTACCCCGAGGCAACAAGCGACTCGGG  
309 ATACTGGTGACAGGCTAAGGATGCCCTTCAGGTACCCCGAGGTAACACGGGACTTGGG  
312 TTTCTGGAGACAGGCTAAGGATGCCCTTCAGGTACCTCGAGGTAACAAGAGACTCGAG  
313 TTTCTGGAGACAGGCTAAGGATGCCCTTCAGGTACCCCGAGGTAACACGAGACTCGGG  
316 TTTCTGGAGACAGGCTAAGGATGCCCTTCAGGTACCTGAGGTAACAAGTGACTCAGG  
318 TTTCTGGAGACAGGCTAAGGATGCCCTTCAGGTACCCAGAGGTAACAAGAGACTCTGG  
314 TTTCTGGAGACAGGCTAAGGATGCCCTTCAGGTACCTGAGGTAACAAGTGACTCAGG  
315 TTTCTGGAGACAGGCTAAGGATGCCCTTCAGGTACCCCGAGGTAACAAGCGACTCGGG  
317 TTTCTGGAGACAGGCTAAGGATGCCCTTCAGGTACCCCGAGGTAACACGAGACTCGGG  
  
310 ATCT-GAGAAGGGGATTGGGACTTCTTTAAAAGCGCCC-AGTTTAAAAAGCTTCTATGCC  
311 ATCT-GAGAAGGGGACTGGGGCTTCTGTAAAAGCGCCC-GGTTTAAAAAGCTTCTATGCC  
307 ATCT-GAGAAGGGGACCAGGGCTTCTATAAAAAGTGCCC-AATTTAAAAAGCTTCTATGCC  
308 ATCT-GAGAAGGGGATTGGGACTTCTACAAAAGTGCCC-AATTTAAAAAGCTTCTATGCC  
306 ATCT-GAGAAGGGA--TGGGA-TTCTGTAAAAGCGCCC-GGTTTAAAAAGCTTCTATGCC  
276 ATCT-GAGAAGGGGACCAGGGACTTCTTTCAAAGCGCCC-AGTTTAAAAAGCTTCTATGCC  
277 ATCT-GAGAAGGGGACTGGGGCTTCTATAAAAAGCGCCC-AGTTTAAAAAGCTTCTATGCC  
278 ATCT-GAGAAGGGGATTGGGGCTTCTTTAAAAGCGCCC-TGTTTAAAAAGCTTCTATGCC  
288 ATCT-GAGAAGGGGACCAGGGACTTCTATAAAAAGCGCCC-AGTTTAAAAAGCTTCTATGCC  
305 ATCT-GAGAAGGGGACTGAGACTTCTATAAAAAGTGCCC-AGTTTAAAAAGCTTCTATGCC  
290 ATCT-GAGAAGGGGGCTGGGGCTTCTATAAAAAGCGCCC-AGTTTAAAAAGCTTCTATGCC  
292 ATCT-GAGAAGGGGACTGGGACTTCTTTAAAAGCGCCC-AGTTTAAAAAGCTTCTATGTC  
244 ATCT-GAGAAGGGGATTGGGGCTTCTATAAAAAGCGCCC-AGTTTAAAAAGCTTCTATGCC  
257 ATCT-GAGAAGGGGATTGGGGCTTCTGTAAAAGCGCCC-AGTTTAAAAAGCTTCTATGCC  
299 ATCT-GAGAAGGGGACTGGGGCTTCTTTAAAAGTGCCC-AGTTTAAAAAGCTTCTATGCC  
245 ATCT-GAGAAGGGGATTGGGGCTTCTGTAAAAGCGCCC-AGTTTAAAAAGCTTCTATGCC  
258 ATCT-GAGAAGGGGACTGGGGCTTCTGTAAAAGCGCCC-AGTTTAAAAAGCTTCTATGCC  
236 ATCT-GAGAAGGGGATTGGGGCTTCTGTAAAAGCGCCC-AGTTTAAAAAGCTTCTATGCC  
246 ATCT-GAGAAGGGGATTGGGGCTTCTATAAA-GTGCCCT-GGTTTAAAAAGCTTCTATGCC  
259 ATCT-GAGAAGGGGATTGGGGCTTCTGTAAAAGCGCCC-GGTTTAAAAAGCTTCTATGCC  
268 ATCT-GAGAAGGGGACTGGGGCTTCTGTAAAAGCGCCC-AGTTTAAAAAGCTTCTATGCC  
280 ATCT-GAGAAGGGGACTGGGACTTCTGTAAAAGCGCCC-AGTTTAAAAAGCTTCTATGCC  
247 ATCT-GAGAAGGGGACTGGGACTTCTGTAAAAGCGCCC-AGTTTAAAAAGCTTCTATGCC  
220 ATCT-GAGAAGGGGATTGGGACTTCTTTAAAAGTGCCCCAGTTTAAAAAGCTTCTATGCC  
222 ATCT-GAGAAGGGGACTGGGACTTCTTTAAAAGCGCCT-AGTTTAAAAAGCTTCTACGCC  
238 ATCT-GAGAAGGGGACTGGGGCTTCTTTAAA-GTGCCC-AGTTTAAAAAGCTTCTATGCC  
248 ATCT-GAGAAGGGGACTGGGGCTTCTTTAAA-GCGCCC-AGTTTAAAAAGCTTCTATGCC  
261 ATCT-GAGAAGGGGACTGGGACTTCTTTAAAAGCGCCC-TGTTTAAAAAGCTTCTATGCC

249 ATCT-GAGAAGGGGACTGGGGCTTCTTTAAAAGCGCCT-AGTTTAAAAAAGCTTCTACGCC  
293 ATCT-GAGAAGGGGACTGGGGCTTCTTTAAAAGCGCTC-AGTTTAAAAAGCTTCTATGCC  
294 ATCT-GAGAAGGGGCTGAGGCTTCTTTAAAAGTGCTC-AGTTTAAAAAGCTTCTATGCC  
295 ATCT-GAGAAGGGGACTGAGACTTCTTTAAAAGCGCCC-AGTTTAAAAAGCTTCTATGTC  
296 ATCT-GAGAAGGGGACTGGGGCTTCTTTAAAAGTGCC-AGTTTAAAAAGCTTCTACGCC  
260 ATCT-GAGAAGGGGACTGGGGCTTCTTTAAAAGTGCC-AGTTTAAAAAGCTTCTATGCC  
61 ATCT-GAGAAGGGGACTGGGGCTTCTGTA AAAAGCGCCC-GGTTTAAAAAGCTTCTATGCC  
132 ATCT-GAGAAGGGGACTGGGGCTTCTTTAAAAGTGCCC-AGTTTAAAAAGCTTCTATGCC  
125 ATCT-GAGAAGGGGACTGGGGCTCCTTTAAAAGCGCCC-AGTTTAAAAAGCTTCTATGCC  
126 ATCT-GAGAAGGGGACTGGGGCTTCTTTAAAAGCGCCC-GGTTTAAAAAGCTTCTATGCC  
173 ATCT-GAGAAGGGGACTGGGACTTCTTTAAAAGTGCCC-AGTTTAAAAAGCTTCTATGCC  
204 ATCT-GAGAAGGGGACTGGGACTTCTTTAAAAGTGCCC-AGTTTAAAAAGCTTCTATGCC  
174 ATCT-GAGAAGGGGACTGGGACTTCTTTAAA-GTGCCC-AGTTTAAAAAGCTTCTATGCC  
175 ATCT-GAGAAGGGGACTGGGACTTCTTTAAAAGCGCCT-AGTTTAAAAAGCTTCTACGCC  
205 ATCT-GAGAAGGGGACTGGGACTTCTATAAAAAGTGCCC-AGTTTAAAAAGCTTCTATGCC  
127 ATCT-GAGAAGGGGACTGGGGCTTCTTTAAAAGTGCCC-GGTTTAAAAAGCTTCTATGCC  
218 ATCT-GAGAAGGGGATTGGGGCTTCTTTAAAAGTGCCC-AGTTTAAAAAGCTTCTATGCC  
217 ATCT-GAGAAGGGGACTGGGGCTTCTATAAAAAGCGCCC-AGTTTAAAAAGCTTCTATGCC  
133 ATCT-GAGAAGGGGACTGGGACTTCTTTAAAAGTGCCC-AGTTTAAAAAGCTTCTATGCC  
225 ATCT-GAGAAGGGGACTGGGGCTTCTTTAAAAGTGCCC-AGTTTAAAAAGCTTCTATGCC  
228 ATCT-GAGAAGGGGACTGGGGCTTCTTTAAAAGCGCCC-AGTTTAAAAAGCTTCTACGCC  
255 ATCT-GAGAAGGGGACTGGGGCTTCTGTA AAAAGCGCCC-GGTTTAAAAAGCTTCTATGCC  
266 ATCT-GAGAAGGGGACTGGGACTTCTTTAAAAGCGCCC-AGTTTAAAAAGCTTCTATGCC  
1 ATCT-GAGAAGGGGACTGGGGCTTCTATAAAAAGCGCTC-GGTTTAAAAAGCTTCTATGCC  
2 ATCT-GAGAAGGGGACTGGGGCTTCTATAAAAAGCGCTC-GGTTTAAAAAGCTTCTATGCC  
3 ATCT-GAGAAGGGGACTGGGGCTTCTATAAAAAGTGCTC-GGTTTAAAAAGCTTCTATGCC  
4 ATCT-GAGAAGGGGACTGGGGCTTCTATAAAAAGCGCTC-GGTTCAAAAAGCTTCTACGCC  
5 ATCT-GAGGAGGGGACTGAGGCTTCTATAAAAAGCGCCC-AGTTTAAAAAGCTTCTATGCC  
7 ATCT-GAGGAGGGGACTGAGGCTTCTATAAAAAGCGCCC-AGTTTAAAAAGCTTCTATGCC  
9 ATCT-GAGGAGGGGACTGAGGCTTCTTTAAAAGCGCCC-GGTTTAAAAAGCTTCTATGCC  
6 ATCT-GAGAAGGGGACTGGGGCTTCTATAAAAAGCGCTC-GGTTTAAAAAGCTTCTATGCC  
8 ATCT-GAGAAGGGGACTGGGGCTTCTATAAAAAGCGCTC-GGTTTAAAAAGCTTCTATGCC  
10 ATCT-GAGAAGGGGACTGGGGCTTCTGTA AAAAGCGCCC-AGTTTAAAAAGCTTCTATGCC  
12 ATCT-GAGAAGGGGACTGGGGCTTCTGTA AAAAGCGCCC-AGTTTAAAAAGCTTCTATGCC  
11 ATCT-GAGAAGGGGACTGGGGCTTCTGTA AAAAGCGCCC-AGTTTAAAAAGCTTCTATGCC  
13 ATCT-GAGAAGGGGACTGGGGCTTCTATAAAAAGCGTCC-AGTTTAAAAAGCTTCTATGCC  
22 ATCT-GAGAAGGGGACTGGGGCTTCTTTAAAAGCGCTC-GGTTTAAAAAGCTTCTATGCC  
23 ATCT-GAGAAGGGGACTGAGGTTTCTGTA AAAAGTGCTC-AGTTTAAAAAGCTTCTATGCC  
18 ATCT-GAGAAGGGGACTGGGGCTTCTATAAAAACCGCCC-AGTTTAAAAAGCTTCTATGCC  
19 ATCT-GAGAAGGGGACTGGGGTCTATAAAAACCGCCC-AGTTTAAAAAGCTTCTATGCC  
14 ATCT-GAGAAGGGGACTGGGGCTTCTATAAAAAGCGTCC-AGTTTAAAAAGCTTCTATGCC  
30 ATCT-GAGAAGGGGACTAGGGCTTCTGTA AAAAGTGCTC-AGTTTAAAAAGCTTCTATGCC  
24 ATCT-GAGAAGGGGACTAGGGCTTCTATAAAAAGCGTCC-AGTTTAAAAAGCTTCTATGCC  
35 ATCT-GAGAAGGGGACTGGGACTTCTTTAAAAGCGCTC-GGTTTAAAAAGCTTCTATGCC  
31 ATCT-GAGAAGGGGACTAGGGCTTCTTTAAAAGCGCTC-GGTTTAAAAAGCTTCTATGCC  
36 ATCT-GAGAAGGGGACTGAGGCTTCTTTAAAAGCGCTC-GGTTTAAAAAGCTTCTATGCC  
15 ATCT-GAGAAGGGGACTGGGGCTTCTGTA AAAAGTGCTC-GGTTTAAAAAGCTTCTATGCC  
21 ATCT-GAGAAGGGGACTGGGGCTTCTGTA AAAAGCGCCC-AGTTTAAAAAGCTTCTATGCC  
20 ATCT-GAGAAGGGGACTGGGGTCTGTA AAAAGCGCCC-AGTTTAAAAAGCTTCTATGCC  
27 ATCT-GAGAAGGGGACTGAGGCTTCTTTAAA-GCGCCC-AGTTTAAAAAGCTTCTATGCC  
16 ATCT-GAGAAGGGGACTCGGGGCTTCTGTA AAAAGCGCCC-AGTTTAAAAAGCTTCTATGCC  
17 ATCT-GAGAAGGGGACTGGGGCTTCTGTA AAAAGCGCCC-AGTTTAAAAAGCTTCTATGCC  
79 ATCT-GAGAAGGGGACTGGGACTTCTGTA AAAAGCGCCC-GGTTTAAAAAGCTTCTATGCC  
32 ATCT-GAGAAGGGGACTGAGGCTTCTATAAAAAGCGCCC-GGTTTAAAAAGCTTCTATGTC  
33 ATCT-GAGAAGGGGACTCGGGGCTTCTATAAAAAGCGCCC-GGTTTAAAAAGCTTCTATGTC  
37 ATCT-GAGAAGGGGACTGGGGCTTCTATAAAAAGCGTCC-AGTTTAAAAAGCTTCTATGCC  
25 ATCT-GAGAAGGGGACTGGGGCTTCTTTAAAAGCGCTC-GGTTTAAAAAGCTTCTATGCC  
26 ATCT-GAGAAGGGGACTGAGGCTTCTTTAAAAGCGCTC-GGTTTAAAAAGCTTCTATGCC  
38 ATCT-GAGAAGGGGACTGGGGCTTCTGTA AAAAGTGCTC-AGTTTAAAAAGCTTCTATGCC  
28 ATCT-GAGGAGGGGACTGGGGCTTCTGTA AAAAGCGCTC-AGTTTAAAAAGCTTCTATGTC  
34 ATCT-GAGAAGGGGACTCGGGGCTTCTATAAAAAGTGCCC-AGTTTAAAAAGCTTCTATGCC  
29 ATCT-GAGAAGGGGACTGGGGCTTCTGTA AAAAGTGCTC-AGTTTAAAAAGCTTCTATGCC

39 ATCT-GAGAAGGGGCTGGGGCTTCTATAAAAGCGCTC-AGTTTAAAAAGCTTCTATGCC  
40 ATCT-GAGAAGGGGCTGGGGCTTCTTAAAAAGCGCCC-AGTTTAAAAAGCTTCTATGCC  
58 ATCT-GAGAAGGGGACCGGGGTTTCTTTAAA-GTGCCC-AGTTTAAAAAGCTTCTATGCC  
59 ATCT-GAGAAGGGGACTGGGACTTCTTTAAA-GTGCCC-AGTTTAAAAAGCTTCTATGCC  
81 ATCT-GAGAAGGGGACCGGGGTTTCTGTAAAAAGCGCCC-GGTTTAAAAAGCTTCTATGCC  
82 ATCT-GAGAAGGGGACCGGGGTTTCTGTAAAAAGCGCCC-GGTTTAAAAAGCTTCTATGCC  
83 ATCT-GAGAAGGGGACCGGGGTTTCTTTAAAAAGCGCTC-AGTTTAAAAAGCTTCTATGCC  
84 ATCT-GAGAAGGGGACTGGGGCTTCTTTAAAAAGCGCTC-AGTTTAAAAAGCTTCTACGCC  
130 ATCT-GAGAAGGGGACCGGGGTTTCTTTAAAAAGCGCCC-AGTTTAAAAAGCTTCTATGCC  
131 ATCT-GAGAAGGGGATTGGGGCTTCTATAAAAGCGCCC-GGTTTAAAAAGCTTCTATGCC  
51 ATCT-GAGAAGGGGACTGGGACTTCTTTAAA-GTGCCC-AGTTTAAAAAGCTTCTATGCC  
52 ATCT-GAGAAGGGGACTGGGACTTCTTTAAA-GTGCCC-AGTTTAAAAAGCTTCTATGCC  
53 ATCT-GAGAAGGGGACTGGGACTTCTTTAAAAAGCGCTC-GGTTTAAAAAGCTTCTACGCC  
67 ATCT-GAGAAGGGGACTGGGACTTCTTTAAA-GTGCCC-AGTTTAAAAAGCTTCTACGCC  
66 ATCT-GAGAAGGGGACTGGGACTTCTTTAAA-GTGCCC-AGTTTAAAAAGCTTCTACGCC  
107 ATCT-GAGAAGGGGACTGGGACTTCTTTAAA-GTGCCC-AGTTTAAAAAGCTTCTACGCC  
105 ATCT-GAGAAGGGGACTGGGACTTCTTTAAA-GTGCCC-AGTTTAAAAAGCTTCTACGCC  
106 ATCT-GAGAAGGGGACTGGGACTTCTTTAAA-GTGCCC-AGTTTAAAAAGCTTCTACGCC  
65 ATCT-GAGAAGGGGACTGGGACTTCTTTAAA-GTGCCC-AGTTTAAAAAGCTTCTACGCC  
41 ATCT-GAGAAGGGGACTGGGGCTTCTTTAAAGTGCCC-GGTTTAAAAAGCTTCTATGCC  
43 ATCT-GAGGAGGGGACTGGGGCTTCTTTAAAG-TGCC-AGTTTAAAAAGCTTCTATGCC  
98 ATCT-GAGAAGGGGACTGGGGCTTCTTTAAAGCGCTC-GGTTTAAAAAGCTTCTATGCC  
44 ATCT-GAGAAGGGGACTGGGACTTCTTTAAAAAGCGCTC-AGTTTAAAAAGCTTCTATGCC  
108 ATCT-GAGAAGGGGACTGGGACTTCTTTAAA-GTGCCC-AGTTTAAAAAGCTTCTACGCC  
109 ATCT-GAGAAGGGGACTGGGACTTCTTTAAA-GTGCCC-AGTTTAAAAAGCTTCTACGCC  
68 ATCT-GAGAAGGGGACTGGGACTTCTTTAAA-GTGCCC-AGTTTAAAAAGCTTCTACGCC  
54 ATCT-GAGAAGGGGACTGGGGCTTCTTTAAAGTGCTC-AGTTTAAAAAGCTTCTATGCC  
56 ATCT-GAGAAGGGGACTGAGGCCTCTATAAAATCGCCC-GGTTTAAAAAGCTTCTACGCC  
74 ATCT-GAGAAGGGGACTGGGACTTCTATAAAGCGCTC-GGTTTAAAAAAGCTTCTACGCC  
55 ATCT-GAGAAGGGGACTGGGGCTTCTTTAAAAAGCGCTC-GGTTTAAAAAGCTTCTACGCC  
57 ATCT-GAGAAGGGGACCGGGGTTTCTATAAAATCGCCC-GGTTTAAAAAGCTTCTACGCC  
80 ATCT-GAGAAGGGGACCGGGGTTTCTGTAAAAAGCGCCC-GGTTTAAAAAGCTTCTATGCC  
72 ATCT-GAGAAGGGGACTGGGACTTCTTTAAA-GTGCCC-AGTTTAAAAAGCTTCTACGCC  
110 ATCT-GAGAAGGGGACTGGGACTTCTTTAAA-GTGCCC-AGTTTAAAAAGCTTCTACGCC  
73 ATCT-GAGAAGGGGACTGGGACTTCTTTAAA-GTGCCC-AGTTTAAAAAGCTTCTACGCC  
69 ATCT-GAGAAGGGGACTGGGACTTCTTTAAA-GTGCCC-AGTTTAAAAAGCTTCTACGCC  
70 ATCT-GAGAAGGGGACTGGGACTTCTTTAAA-GTGCCC-AGTTTAAAAAGCTTCTATGCC  
71 ATCT-GAGAAGGGGACTGGGACTTCTTTAAA-GTGCCC-AGTTTAAAAAGCTTCTATGTC  
111 ATCT-GAGAAGGGGACTGGGACTCCTTTAAA-GTGCCC-AGTTTAAAAAGCTTCTATGCC  
112 ATCT-GAGAAGGGGACTGGGACTTCTTTAAAGTGCCC-AGTTTAAAAAGCTTCTATGCC  
113 ATCT-GAGAAGGGGACTGGGACTTCTTTAAAGTGCCC-AGTTTAAAAAGCTTCTATGCC  
76 ATCT-GAGAAGGGGACTGGGACTTCTTTAAAGTGCTC-AGTTTAAAAAGCTTCTACGCC  
77 ATCT-GAGAAGGGGACTGGGACTTCTTTAAAGTGCCC-AGTTTAAAAAGCTTCTATGCC  
75 ATCT-GAGGAGGGGACTAGGGCTTCTTTAAA-GCGCCC-AGTTTAAAAAGCTTCTATGCC  
114 ATCT-GAGAAGGGGACTGGGACTTCTTTAAAGTGCCC-AGTTTAAAAAGCTTCTATGCC  
78 ATCT-GAGAAGGGGACTGGGGCTTCTTTAAA-GTGCCC-AGTTTAAAAAGCTTCTATGTC  
115 ATCT-GAGAAGGGGACTGGGACTTCTTTAAAGTGCCC-AGTTTAAAAAGCTTCTATGCC  
116 ATCT-GAGAAGGGGACTGGGACTTCTTTAAAGTGCTC-AGTTTAAAAAGCTTCTATGCC  
60 ATCT-GAGAAGGGGACTGGGACTTCTTTAAAAAGCGCTC-AGTTTAAAAAGCTTCTACGCC  
216 ATCT-GAGAAGGGGACTGGGACTTCTTTAAA-GCGCCC-AGTTTAAAAAGCTTCTATGTC  
166 ATCT-GAGAAGGGGACTAGGGCTTCTTTAAAGTGCCC-AGTTTAAAAAGCTTCTATGCC  
215 ATCT-GAGAAGGGGACTGGGGCTTCTTTAAA-GTGCCC-AGTTTAAAAAGCTTCTATGCC  
103 ATCT-GAGAAGGGGACTGGGGCTTCTTTAAA-GTGCCC-AGTTTAAAAAGCTTCTACGCC  
42 ATCT-GAGAAGGGGACTGGGACTTCTATAAAGTGCCC-AGTTTAAAAAGCTTCTACGCC  
46 ATCT-GAGAAGGGGCTGAGGCTTCTTTAAAAAGCGCTC-AGTTTAAAAAGCTTCTATGCC  
47 ATCT-GAGAAGGGGCTGAGGCTTCTTTAAAAAGCGCTC-AGTTTAAAAAGCTTCTATGCC  
45 ATCT-GAGAAGGGGCTGAGGCTTCTTTAAAAAGCGCTC-AGTTTAAAAAGCTTCTATGCC  
62 ATCT-GAGAAGGGGACCGGGGTTTCTTTAAAAAGCGCTC-AGTTTAAAAAGCTTCTATGCC  
86 ATCT-GAGAAGGGGACAGGGACTTCTTTAAA-GTGCCC-AGTTTAAAAAGCTTCTATGCC  
88 ATCT-GAGAAGGGGACAGGGACTTCTTTAAA-GTGCCC-AGTTTAAAAAGCTTCTATGCC  
87 ATCT-GAGAAGGGGACTGGGACTTCTTTAAA-GTGCCC-AGTTTAAAAAGCTTCTATGCC  
135 ATCT-GAGAAGGGGACTGGGGCTTCTTTAAAAAGCGCTC-AGTTTAAAAAGCTTCTACGCC

85 ATCT-GAGAAGGGGACTGGGGCTTCTTTAAA-GTGCCC-AGTTTAAAAAGCTTCTATGCC  
134 ATCT-GAGAAGGGGACTGGGACTTCTTTAAAAGCGCCT-AGTTTAAAAAGCTTCTACGCC  
117 ATCT-GAGAAGGGGACTGGGACTTCTTTAAAAGTGCTC-AGTTTAAAAAGCTTCTATGCC  
118 ATCT-GAGAAGGGGACTGGGACTTCTTTAAAAGTGCCC-AGTTTAAAAAGCTTCTATGCC  
199 ATCT-GAGAAGGGGACTGGGACTTCTTTAAAAGTGCCC-AGTTTAAAAAGCTTCTATGCC  
200 ATCT-GAGAAGGGGACTGGGACTTCTATAAAAAGTGCCC-AGTTTAAAAAGCTTCTATGCC  
119 ATCT-GAGAAGGGGACTGGGACTTCTTTAAAAGTGCCC-AGTTTAAAAAGCTTCTATGCC  
198 ATCT-GAGAAGGGGACTGGGACTTCTTTAAAAGTGCCC-AGTTTAAAAAGCTTCTATGCC  
207 ATCT-GAGAAGGGGACTGGGACTTCTTTAAA-GTGCCC-AGTTTAAAAAGCTTCTATGCC  
219 ATCT-GAGAAGGGGACTGGGACTTCTTTAAAAGTGCCC-AGTTTAAAAAGCTTCTATGCC  
206 ATCT-GAGAAGGGGACTGGGACTTCTTTAAAAGTGCCC-GTTTAAAAAGCTTCTATGCC  
121 ATCT-GAGAAGGGGACTGGGCTTCTTTAAAAGTGCCC-AGTTTAAAAAGCTTCTATGCC  
201 ATCT-GAGAAGGGGACTGGGCTTCTTTAAAAGTGCCC-AGTTTAAAAAGCTTCTATGCC  
122 ATCT-GAGAAGGGGACTGGGACTTCTTTAAAAGTGCCC-AGTTTAAAAAGCTTCTATGCC  
120 ATCT-GAGAAGGGGACTGGGACTTCTTTAAAAGCGCCT-AGTTTAAAAAGCTTCTACGCC  
202 ATCT-GAGAAGGGGACTGGGACTTCTTTAAAAGCGCCC-AGTTTAAAAAGCTTCTATGCC  
203 ATCT-GAGAAGGGGACTGGGCTTCTTTAAAAGTGCCC-AGTTTAAAAAGCTTCTATGCC  
171 ATCT-GAGAAGGGGACTGGGACTTCTTTAAAAGTGCCC-AGTTTAAAAAGCTTCTATGCC  
172 ATCT-GAGAAGGGGACTGGGACTTCTTTAAAAGTGCCC-AGTTTAAAAAGCTTCTATGCC  
123 ATCT-GAGAAGGGGACTGGGACTTCTTTAAAAGTGCCC-AGTTTAAAAAGCTTCTATGCC  
124 ATCT-GAGAAGGGGACTGGGACTTCTTTAAAAGTGCCC-AGTTTAAAAAGCTTCTATGCC  
128 ATCT-GAG--GGGACTGGGACTTCTGTA AAAACGCC-AGTTTAAAAAGCTTCTATGCC  
129 ATCT-GAGAAGGGGACTGGGCTTCTGTA AAAACGCC-AGTTTAAAAAGCTTCTATGCC  
177 ATCT-GAGAAGGGGACTGGGCTTCTTTAAAAGCGCCT-AGTTTAAAAAGCTTCTACGCC  
209 ATCT-GAGAAGGGGACTGGGCTTCTTTAAAAGCGCCT-AGTTTAAAAAGCTTCTACGCC  
178 ATCT-GAGAAGGGGACTGGGCTTCTTTAAAAGTGCCC-AGTTTAAAAAGCTTCTATGCC  
208 ATCT-GAGAAGGGGACTGGGCTTCTTTAAAAGCGCCT-AGTTTAAAAAGCTTCTACGCC  
136 ATCT-GAGAAGGGGACTGGGCTTCTTTAAAAGCGCCT-AGTTTAAAAAGCTTCTACGCC  
264 ATCT-GAGAAGGGGACTGGGCTTCTTTAAAAGCGCCC-AGTTTAAAAAGCTTCTATGCC  
89 ATCT-GAGAAGGGGACTGGGACTTCTTTAAAAGCGCCT-AGTTTAAAAAGCTTCTACGCC  
95 ATCT-GAGAAGGGGACTGGGCTTCTTTAAAAGCGCTT-AGTTTAAAAAGCTTCTACGCC  
158 ATCT-GAGAAGGGGACTGGGCTTCTATAAAAAGTGCCC-AGTTTAAAAAGCTTCTATGCC  
211 ATCT-GAGAAGGGGACTGGGCTTCTATAAAAAGCGCCT-GTTTAAAAAGCTTCTATGCC  
147 ATCT-GAGAAGGGGACTGGGCTTCTTTAAAAGCGCCT-AGTTTAAAAAGCTTCTACGCC  
163 ATCT-GAGAAGGGGACTGGGCTTCTTTAAAAGCGCCT-AGTTTAAAAAGCTTCTACGCC  
96 ATCT-GAGAAGGGGACTGGGCTTCTTTAAAAGCGCTT-AGTTTAAAAAGCTTCTACGCC  
159 ATCT-GAGAAGGGGACTGGGCTTCTTTAAAAGCGCCT-AGTTTAAAAAGCTTCTACGCC  
137 ATCT-GAGAAGGGGACTGGGCTTCTTTAAAAGCGCCT-AGTTTAAAAAGCTTCTACGCC  
176 ATCT-GAGAAGGGGACTGGGCTTCTTTAAAAGCGCCT-AGTTTAAAAAGCTTCTACGCC  
138 ATCT-GAGAAGGGGACTGGGCTTCTTTAAAAGCGCCT-AGTTTAAAAAGCTTCTACGCC  
140 ATCT-GAGAAGGGGACTGGGCTTCTTTAAAAGCGCCT-AGTTTAAAAAGCTTCTACGCC  
149 ATCT-GAGAAGGGGACTGGGCTTCTTTAAAAGCGCCT-AGTTTAAAAAGCTTCTACGCC  
188 ATCT-GAGAAGGGGACTGGGCTTCTTTAAAAGCGCCT-AGTTTAAAAAGCTTCTACGCC  
139 ATCT-GAGAAGGGGACTGGGCTTCTTTAAAAGCGCCT-AGTTTAAAAAGCTTCTACGCC  
187 ATCT-GAGAAGGGGACTGGGCTTCTTTAAAAGCGCCT-AGTTTAAAAAGCTTCTACGCC  
186 ATCT-GAGAAGGGGACTGGGCTTCTTTAAAAGCGCCT-AGTTTAAAAAGCTTCTACGCC  
184 ATCT-GAGAAGGGGACTGGGCTTCTTTAAAAGCGCCT-AGTTTAAAAAGCTTCTACGCC  
185 ATCT-GAGAAGGGGACTGGGCTTCTTTAAAAGCGCCT-AGTTTAAAAAGCTTCTACGCC  
97 ATCT-GAGAAGGGGACTGGGCTTCTATAAAAAGCGCCC-AGTTTAAAAAGCTTCTATGCC  
164 ATCT-GAGAAGGGGACTGGGCTTCTTTAAAAGCGCCT-AGTTTAAAAAGCTTCTACGCC  
165 ATCT-GAGAAGGGGACTGGGCTTCTGTA AAAAGTGCC-AGTTTAAAAAGCTTCTATGCC  
90 ATCT-GAGAAGGGGACTGGGCTTCTATAAAAAGTGCCC-AGTTTAAAAAGCTTCTATGCC  
91 ATCT-GAGAAGGGGACTGGGCTTCTATAAAAAGTGCCC-AGTTTAAAAAGCTTCTATGCC  
243 ATCT-GAGAAGGGGACTGGGCTTCTATAAAAAGCGCCC-AGTTTAAAAAGCTTCTATGCC  
242 ATCT-GAGAAGGGGACTGGGACTTCTGTA AAAAGCGCCC-AATTTAAAAAGCTTCTATGCC  
252 ATCT-GAGAAGGGGACTGGGACTTCTTTAAAAGTGCTC-AGTTTAAAAAGCTTCTATGCC  
194 ATCT-GAGAAGGGGACTGGGCTTCTTTAAAAGTGCCC-AGTTTAAAAAGCTTCTATGCC  
195 ATCT-GAGAAGGGGACTGGGACTTCTTTAAAAGTGCCC-AGTTTAAAAAGCTTCTATGCC  
169 ATCT-GAGAAGGGGACTGGGACTTCTTTAAAAGTGCCC-AGTTTAAAAAGCTTCTATGCC  
170 ATCT-GAGAAGGGGACTGGGACTTCTTTAAAAGTGCCC-AGTTTAAAAAGCTTCTATGCC  
196 ATCT-GAGAAGGGGACTGGGACTTCTTTAAAAGTGCCC-AGTTTAAAAAGCTTCTATGCC  
197 ATCT-GAGAAGGGGACTGGGACTTCTTTAAAAGTGCCC-AGTTTAAAAAGCTTCTATGCC

231 ATCT-GAGAAGGGGACTGAGACTTCTTTAAAAGTGCCC-AGTTTAAAAAGCTTCTATGCC  
232 ATCT-GAGAAGGGGACTGAGACTTCTTTAAA-GCGCCC-AGTTTAAAAAGCTTCTATGCC  
230 ATCT-GAGAAGGGGACTGAGACTTCTTTAAAAGTGCCC-AGTTTAAAAAGCTTCTATGCC  
233 ATCT-GAGAAGGGGACTGGGGCTTCTATAAAAAGCGCCC-AGTTTAAAAAGCTTCTATGCC  
234 ATCT-GAGAAGGGGATTGGGGCTTCTATAAAAAGCACCC-AGTTTAAAAAGCTTCTATGCC  
235 ATCT-GAGAAGGGGACTGGGGCTTCTGTA AAAAGCGCCC-AGTTTAAAAAGCTTCTATGCC  
229 ATCT-GAGAAGGGGACTGGGGCTTCTTTAAAAGTGCCC-AGTTTAAAAAGCTTCTATGCC  
265 ATCT-GAGAAGGGGACTGGGGCTTCTGTA AAAAGTGCCC-AGTTTAAAAAGCTTCTATGCC  
282 ATCT-GAGAAGGGGATTGGGACTTCTTTAAAAGTGCCC-GGTTTAAAAAGCTTCTATGTC  
256 ATCT-GAGAAGGGGATTGGGGCTTCTATAAAAAGCGCCC-AGTTTAAAAAGCTTCTATGCC  
49 ATCT-GAGAAGGGGACTGGGGCTTCTTTAAA-GTGCCC-AGTTTAAAAAGCTTCTATGCC  
50 ATCT-GAGAAGGGGACTGGGACTTCTTTAAA-GTGCCC-AGTTTAAAAAGCTTCTATGCC  
48 ATCT-GAGAAGGGGCTGAGGCTTCTGTA AAAAGCGCCC-AGTTTAAAAAGCTTCTATGCC  
63 ATCT-GAGAAGGGGACTGAGGCTTCTTTAAA-GTGCCC-AGTTTAAAAAGCTTCTACGCC  
104 ATCT-GAGAAGGGGACTGGGACTTCTTTAAA-GTGCCC-AGTTTAAAAAGCTTCTACGCC  
93 ATCT-GAGAAGGGGACTGGGGCTTCTTTAAA-GTGCCC-AGTTTAAAAAGCTTCTATGCC  
94 ATCT-GAGAAGGGGACTGGGACTTCTTTAAAAGCGCTT-AGTTTAAAAAGCTTCTACGCC  
92 ATCT-GAGAAGGGGACTGGGGCTTCTTTAAAAGCGCCT-AGTTTAAAAAGCTTCTACGCC  
167 ATCT-GAGAAGGGGACTGGGACTTCTTTAAAAGTGCCC-AGTTTAAAAAGCTTCTATGCC  
168 ATCT-GAGAAGGGGACTGGGACTTCTTTAAAAGTGCCC-AGTTTAAAAAGCTTCTATGCC  
64 ATCT-GAGAAGGGGACTGGGACTTCTTTAAA-GTGCCC-AGTTTAAAAAGCTTCTACGCC  
181 ATCT-GAGAAGGGGACTGGGACTTCTTTAAAAGTGCTT-AGTTTAAAAAGCTTCTATGCC  
141 ATCT-GAGAAGGGGACTGGGGCTTCTTTAAAAGCGCCT-AGTTTAAAAAGCTTCTACGCC  
152 ATCT-GAGAAGGGGACTGGGGCTTCTTTAAAAGCGCCT-AGTTTAAAAAGCTTCTACGCC  
144 ATCT-GAGAAGGGGACTGGGGCTTCTTTAAAAGCGCCT-AGTTTAAAAAGCTTCTACGCC  
150 ATCT-GAGAAGGGGACTGGGGCTTCTTTAAAAGCGCCT-AGTTTAAAAAGCTTCTACGCC  
151 ATCT-GAGAAGGGGACTGGGGCTTCTTTAAAAGCGCCT-AGTTTAAAAAGCTTCTACGCC  
145 ATCT-GAGAAGGGGACTGGGGCTTCTTTAAAAGCGCCT-AGTTTAAAAAGCTTCTACGCC  
156 ATCT-GAGAAGGGGACTGGGGCTTCTTTAAAAGCGCCT-AGTTTAAAAAGCTTCTACGCC  
148 ATCT-GAGAAGGGGACTGGGGCTTCTTTAAAAGCGCCT-AGTTTAAAAAGCTTCTACGCC  
143 ATCT-GAGAAGGGGACTGGGGCTTCTTTAAAAGCGCCT-AGTTTAAAAAGCTTCTACGCC  
155 ATCT-GAGAAGGGGACTGGGGCTTCTTTAAAAGCGCCT-AGTTTAAAAAGCTTCTACGCC  
154 ATCT-GAGAAGGGGACTGGGGCTTCTTAAAG-GCGCCT-GGTTTAAAAAGCTTCTATGCC  
189 ATCT-GAGAAGGGGACTGGGGCTTCTTTAAAAGCGCCC-GGTTTAAAAAGCTTCTACGCC  
142 ATCT-GAGAAGGGGACTGGGGCTTCTATAAAAAGTGCCC-AGTTTAAAAAGCTTCTATGCC  
153 ATCT-GAGAAGGGGACTGGGGCTTCTATAAAAAGTGCCC-AGTTTAAAAAGCTTCTATGCC  
190 ATCT-GAGAAGGGGACTGGGGCTTCTTTAAA-GTGCCC-AGTTTAAA-GCTTCTATGCC  
99 ATCT-GAGAAGGGGACTGAGGCTTCTTTAAAAGCGCTC-GGTTTAAAAAGCTTCTATGCC  
191 ATCT-GAGAAGGGGACTGGGACTTCTTTAAAAGTGCTT-AGTTTAAAAAGCTTCTATGCC  
192 ATCT-GAGAAGGGGACTGGGACTTCTTTAAAAGCGCCC-AGTTTAAAAAGCTTCTATGCC  
160 ATCT-GAGAAGGGGACTGGGGCTTCTTTAAAAGCGCCC-AGTTTAAAAAGCTTCTATGCC  
180 ATCT-GAGAAGGGGACTGGGGCTTCTTTAAAAGTGCTT-AGTTTAAAAAGCTTCTATGCC  
213 ATCT-GAGAAGGGGACTGGGGCTTCTATAAAAAGTGCCC-AGTTTAAAAAGCTTCTATGCC  
100 ATCT-GAGAAGGGGACCGAGGCTTCTTTAAAAGCGCCT-AGTTTAAAAAGCTTCTACGCC  
101 ATCT-GAGAAGGGGACTGGGGCTTCTTTAAAAGCGCCT-AGTTTAAAAAGCTTCTACGCC  
146 ATCT-GAGAAGGGGACTGGGGCTTCTTTAAAAGCGCCT-AGTTTAAAAAGCTTCTACGCC  
157 ATCT-GAGAAGGGGACTGGGGCTTCTTTAAAAGCGCCT-AGTTTAAAAAGCTTCTACGCC  
162 ATCT-GAGAAGGGGACTGGGGCTTCTTTAAAAGCGCCT-AGTTTAAAAAGCTTCTACGCC  
182 ATCT-GAGAAGGGGACTGGGGCTTCTTTAAAAGCGCCT-AGTTTAAAAAGCTTCTACGCC  
183 ATCT-GAGAAGGGGACTGGGGCTTCTTTAAAAGCGCCT-AGTTTAAAAAGCTTCTACGCC  
102 ATCT-GAGAAGGGGACTGGGGCTTCTTTAAAAGCGCCT-AGTTTAAAAAGCTTCTACGCC  
161 ATCT-GAGAAGGGGACTGGGGCTTCTTTAAAAGCGCCC-AGTTTAAAAAGCTTCTATGCC  
193 ATCT-GAGAAGGGGACTGGGGCTTCTTTAAAAGCGCCC-AGTTTAAAAAGCTTCTATGCC  
227 ATCT-GAGAAGGGGACAGGGGCTTCTTTAAAAGCGCCC-AGTTTAAAAAGCTTCTACGCC  
254 ATCT-GAGAAGGGGACAGGGGCTTCTTTAAAAGCGCCC-AGTTTAAAAAGCTTCTATGCC  
214 ATCT-GAGAAGGGGACTGGGGCTTCTTCAAAGCGCCC-AGTTTAAAAAGCTTCTATGCC  
179 ATCT-GAGAAGGGGACTGGGGCTTCTACAAAAGTGCCC-AGTTTAAAAAGCTTCTATGCC  
212 ATCT-GAGAAGGGGACTAGGGCTTCTATAAAAAGTGCCC-AGTTTAAAAAGCTTCTATGCC  
241 ATCT-GAGAAGGGGACTGGGGCTTCTGTA AAAAGTGCCC-AGTTTAAAAAGCTTCTATGCC  
210 ATCT-GAGAAGGGGACTGGGGCTTCTTTAAAAGCGCCC-AGTTTAAAAAGCTTCTATGCC  
223 ATCTGAGAAGGGGACTGGGGCTTCTTTAAAAGTGCTC-AGCTTAAAAAGCTTCTATGCC  
239 ATCT-GAGAAGGGGACTGGGACTTCTTTAAAAGTGCCC-AGTTTAAAAAGCTTCTATGCC

262 ATCT-GAGAAGGGGACAGGGGCTTCTTTAAAAGTGCCC-GGTTAAAAAGCTTCTATGCC  
240 ATCT-GAGAAGGGGACTGGGACTTCTTTAAAAGCGCCC-AGTTAAAAAGCTTCTATGCC  
284 ATCT-GAGAAGGGGATTGGGACTCCTTTAAA-GTGCTC-ATTTAAAAAGCTTCTATGCC  
251 ATCT-GAGAAGGGGACTGGGACTTCTGTA AAAAGTGCCC-AGTTAAAAAGCTTCTATGCC  
263 ATCT-GAGAAGGGGACCGGGACTTCTTTAAAAGTGCCC-AGTTAAAAAGCTTCTATGCC  
250 ATCT-GAGAAGGGGACTGGGGCTTCTTTAAAAGTGCCC-AGTTAAAAAACTTCTATGCC  
224 ATCT-GAGAAGGGGCTGAGGCTTCTTTAAAAGTGCCC-AGTTAAAAAGCTTCTACGCC  
237 ATCT-GAGAAGGGGATTGGGGCTTCTTTAAAAGCGCCT-AGTTAAAAAGCTTCTACGCC  
281 ATCT-GAGAAGGGGATTGGGGCTTCTTTAAAAGTGCCC-AGTTAAAAAGCTTCTACGCC  
221 ATCT-GAGAAGGGGACAGGGACTTCTTTAAA-GTGCCC-AGTTAAAAAACTTCTATGCC  
226 ATCT-GAGAAGGGGACTGAGACTTCTTTAAAAGCGCCC-TGTTAAAAAGCTTCTATGCC  
253 ATCT-GAGAAGGGGACTGGGACTTCTTTAAAAGCGCCC-TGTTAAAAAGCTTCTATGCC  
286 ATCT-GAGAAGGGGATTGGGACTTCTTTAAAAGCGCCC-TGTTAAAAAGCTTCTATGCC  
279 ATCT-GAGAAGGGGACAGGGGCTTCTTTAAAAGTGCCC-AGTTAAAAAGCTTCTATGTC  
287 ATCT-GAGAAGGGGACAGGGGCTTCTTTAAAAGTGCCC-GGTTAAAAAGCTTCTATGTC  
267 ATCT-GAGAAGGTGACTGGGGCTCTGTA AAAAGCGCCC-AGTTAAAAAGCTTCTATGCC  
291 ATCT-GAGAAGGGGGCTGGGGCTTCTTTAAAAGTGCC-AGTTAAAAAGCTTCTATGCC  
301 ATCT-GAGAAGGGGACTGGGGCTTCTTTAAAAGTGCC-AATTTAAAAAGCTTCTATGTC  
269 ATCT-GAGAAGGGGATTGGGGCTTCTTTAAAAGTGCCC-AGTTAAAAAGCTTCTACGCC  
289 ATCT-GAGAAGGGGCTGGGGCTTCTATA AAAAGCGCCC-AGTTAAAAAGCTTCTATGCC  
302 ATCT-GAGAAGGGGATTGGGACTTCTTTAAAAGCGCCC-AGTTAAAAAGCTTCTATGTC  
274 ATCT-GAGAAGGGGACTGGGACTTCTTTAAAAGTGCCC-GGTTAAAAAGCTTCTATGTC  
275 ATCT-GAGAAGGGGACCGGGACTTCTTTAAAAGTGCCC-GGTTAAAAAGCTTCTATGCC  
297 ATCT-GAGAAGGGGACTGGGACTTCTTTAAAAGTGCCC-GGTTAAAAAGCTTCTATGCC  
304 ATCT-GAGAAGGGGACTGGGGCTTCTTTAAAAGTGCTC-GGTTAAAAAGCTTCTATGCC  
270 ATCT-GAGAAGGGGATTGGGACTTCTTTAAAAGTGCCC-AGTTAAAAAGCTTCTACGCC  
298 ATCT-GAGAAGGGGACCGGGACTTCTTTAAAAGCGCCC-AGTTAAAAAACTTCTATGCC  
283 ATCT-GAGAAGGGGACTGGGGCTTCTTTAAA-GTGCCC-AGTTAAAAAGCTTCTACGCC  
300 ATCT-GAGAAGGGGACTGGGGCTTCTTTAAAAGTGCC-AGTTAAAAAGCCTTCTATGCC  
271 ATCT-GAGAAGGGGATTGGGACTTCTTTAAAAGTGCCC-AGTTAAAAAGCTTCTACGCC  
272 ATCT-GAGAAGGGGATTGGGACTTCTTTAAAAGTGCTC-AGTTAAAAAGCTTCTATGCC  
273 ATCT-GAGAAGGGGACTGGGACTTCTTTAAAAGTGCTC-AGTTAAAAAGCTTCTATGCC  
285 ATCT-GAGAGGGGAATGGGACTTCTTTAAAAGTGCC-AATTTAAAAAGCTTCTATGTC  
303 ATCT-GAGAAGGGGACTGGGGCTTCTGTA AAAAGCGCCC-AGTTAAAAAGCTTCTATGCC  
309 ATCT-GAGAAGGGGATTGGGACTTCTATA AAAAGTGCCC-AATTTAAAAAGCTTCTATGCC  
312 ATCT-GAGAAGGGGATCGGGGCTTCTTTAAAAGTGCC-GGTTAAAAAGCTTCTATGCC  
313 ATCT-GAGAAGGGGACAGGAGTCTGTA AAAAGTGCCC-AGTTAAAAAGCTTCTATGCC  
316 ATCT-GAGGAGGGGACTGGGGCTTCTATAA AACTGCC-GGTTAAAAACCTTCTATGCC  
318 ATCT-GAGAAGGGGACCGGGGCTTCTATA AAAAGCGCCC-GTTTAAAAAGCTTCTATGCC  
314 ATCT-GAGGAGGGGACTGGGGCTTCTATC CAAGCGCCC-AATTTAAAAAGCTTCTATGCC  
315 ATCT-GAGAAGGGGATTGGGGCTTCTGTA AAAAGTGCCC-AGTTAAAAAGCTTCTATGCC  
317 ATCT-GAGAAGGGGACTGGGAGTCTATA AAAAGTGCCC-GGTTAAAAAGCTTCTATGCC  
  
310 TGAATAGTGACCGGAGGCCGGCACCTTTTCTTTA-----  
311 TGAATAGTGACCGGAGGCCGGCACCTTTTCTTTATCAAT-----  
307 TGAATAGTGACCGGAGGCCGGCACCTTTTCTCTACAA-----  
308 TGAATAGTGACCGGAGGCCGGCACCTTTTCTCTACAA-----  
306 TGAATAGTGACCGGAGGCCGGCACCTTTTCTCTACAA-----  
276 TGAATAGGCGACCGGAGGCCGGCGCTTTTCTT-----  
277 TGAATAGGCGACCGGAGGCCGGC-----  
278 TGGATAAGCGACCGGAGGCCGGTGCCTTTCTTTA-----  
288 TGAATAGGCGACCGGAGGCCGGCGCTTTT-----  
305 TGAATAGGCGACCGGAGGCCGGCGCTTTT-----  
290 TGAATAGGCGACCGGAGGCCGGCGCTTTCTCTT-----  
292 TGTGTAGGTGACCGGAGGCCGGCGCTTT-----  
244 TGAATAGGCGACCGGAGGCCGGCGCTTTTCTT-----  
257 TGAATAGGTGACCGGAGGCCGGCGCTTTTCTT-----  
299 TGAATAGGCGACCGGAGGCCGGCGCTTTTCTT-----  
245 TGAATAGGCGACCGGAGGCCGGCGCTTT-----  
258 TGAATAGGCGACCGGAGGCCGGCGCTTTTCTTGA AATTAATACCC--  
236 TGAATAGGCGACCGGAGGCCGGCACCTTTCTTTA-----  
246 TGAATAGGCGACCGGAGGCCGGCGCTTTCTTTA-----



259 TGAATAGGCGACCGGAGGCCGGCGCCTTTCC-----  
268 TGAATAGGCGACCGGAGGCCGGCGCCTTTCCATTAC-----  
280 TGAATAGGCGACCGGAGGCCGGCGCCTTTCCATTAC-----  
247 TGAATAGGCGACCGGAGGCCGGCGCCTTTCTTTTACCATTA-----  
220 TGAATAGGTGACCGGAGGCCGGCGCCTTTCTTTA-----  
222 TGAATAGGTGACCGGAGGCCGGCGCCTTTCC-----  
238 TGAATAGGTGACCGGAGGCCGGCGCCTTTCC-----  
248 TGAATAGGCGACCGGAGGCCGGCACCTTTCTTTA-----  
261 TGGATAAGCGACCGGAGGCCGGCGCCTTTCTTTT-----  
249 TGAATAGGTGACCGGAGGCCGGCGCCTTTCTTTT-----  
293 TGAATAGGCGACCGGAGGCCGGCGCCTTTCTCTT-----  
294 TGAATAGGCGACCGGAGGCCGGCGCCTTTCCATTCAACTATTACCC-----  
295 TGTGTAGGTGACCGGAGGCCGGCGCCTTTCTTTCAA-----  
296 TGAATAGGCGACCGGAGGCCGGCGCCTTTCTTTT-----  
260 TGAATAGGCGACCGGAGGCCGGCGCCTTTCC-----  
61 TGAATAGGTGACCGGAGGCCGGCGCCTTTCC-----  
132 TGAATAGGCGACCGGAGGCCGGCGCCTTTCTTTT-----  
125 TGAATAGGCGACCGGAGGCCGGCGCCTTTCTTTA-----  
126 TGAATAGGCGACCGGAGGCCGGCGCCTTTCC-----  
173 TGAATAGGCGACCGGAGGCCGGCACCTTT-----  
204 TGAATGGCGACCGGAGGCCGGCGCCTTTCTTTA-----  
174 TGAATAGGTGACCGGAGGCCGGCACCTTTCTTTA-----  
175 TGAATAGGTGACCGGAGGCCGGCACCTTTCTTTA-----  
205 TGAATAGGCGACCGGAGGCCGGCGCCTTT-----  
127 TGAATAGGCGACCGGAGGCCGGCACCTTTTCTTTA-----  
218 TGAATAGGCGACCGGAGGCCGGCGCCTTT-----  
217 TGAATAGGCGACCGGAGGCCGGCGCCTTT-----  
133 TGAATAGGCGACCGGAGGCCGGCACCTTTCTTTA-----  
225 TGAATAGGCGACCGGAGGCCGGCGCCTTTCC-----  
228 TGAATAAGCGACCGGAGGCCGGCGCCTTTCC-----  
255 TGAATAGGCGACCGGAGGCCGGCGCCTTTCTTT-----  
266 TGAATAGGCGACCGGAGGCCGGCGCCTTTCTTT-----  
1 TGAATAGGTGACCGGAGGTCGGCACCTTTCC-TTTACAATTAATGACCCT  
2 TGAATAGGTGACCGGAGGCCGGCACCTTTCC-TTTATAATTAATGACCCT  
3 TGAATAGGTGACCGGAGGCCGGCACCTTTCC-TTTACAATTAATGACCCT  
4 TGAATAGGTGACCGGAGGCCGGCACCTTTTC-TTTA-----  
5 TGAATAGGTGACCGGAGGCCGGCACCTTTCC-TTT-----  
7 TGAATAGGTGACCGGAGGCCGGCACCTTTCC-TTT-----  
9 TGAATAGGTGACCGGAGGCCGGCACCTTTTC-TTTA-----  
6 TGAATAGGTGACCGGAGGCCGGCACCTTTTC-TTTA-----  
8 TGAATAGGTGACCGGAGGCCGGCACCTTTCC-TTTACAATTAATGAC-----  
10 TGAATAGGTGACCGGAGGCCGGCACCTTT-----  
12 TGAATAGGTGACCGGAGGCCGGCACCTTTTC-TTTACA-----  
11 TGAATAGGTGACCGGAGGCCGGCACCTTT-----  
13 TGAATAGGTGACCGGAGGCCGGCACCTTTTC-TTTACA-----  
22 TGAATAGGTGACCGGAGGCCGGCACCTTTCCCTTACAATTAATGAC-----  
23 TGAATAGGTGACCGGAGGCCGGCACCTTTTC-TTTACA-----  
18 TGAATAGGTGACCGGAGGCCGGCACCTTTCTTTA-----  
19 TGAATAGGTGACCGGAGGCCGGCACCTTTTCTTTAATTAATGAC-----  
14 TGAATAGGTGACCGGAGGCCGGCACCTTTCTTTTACAA-----  
30 TGAATAGGTGACCGGAGGCCGGCACCTTTC-TCTACAA-----  
24 TGAATAGGTGACCGGAGGCCGGCACCTTTC-TCTACAA-----  
35 TGAATAGGTGACCGGAGGCCGGCACCTTTC-TTTACAA-----  
31 TGAATAGGTGACCGGAGGCCGGCACCTTCT-TTTA-----  
36 TGAATAGGTGACCGGAGGCCGGCACCTTTCC-TTTACA-----  
15 TGAATAGGTGACCGGAGGCCGGCACCTTTTC-TTTA-----  
21 TGAATAGGTGACCGGAGGCCGGCACCTTT-C-TTTACAA-----  
20 TGAATAGGTGACCGGAGGCCGGCACCTTT-----  
27 TGAATAGGTGACCGGAGGCCGGCACCTTTTCTTTTACTATT-----  
16 TGAATAGGTGACCGGAGGCCGGCACCTTT-----  
17 TGAATAGGTGACCGGAGGCCGGCACCTTTCTTTA-----  
79 TGAATAGGTGACCGGAGGCCGGCACCTTTTCTTTA-----

32 TGAATAGGTGACCGGAGGCAGGCACCTTTCTTTA-----  
33 TGAATAGGTGACCGGAGGCCGGCGCCTTTCCTTTA-----  
37 TGGATAGGTGACCGGAGGCCGGCACCTTTCCCTTTACAACACTACTGAC--  
25 TGAATAGGTGACCGGAGGCCGGCACCTTTCTCTACAA-----  
26 TGAATAGGTGACCGGAGGCCGGCACCTTTCTCTTAC-----  
38 TGAATAGGTGACCGGAGGCCGGCACCTTTCTCTTACAA-----  
28 TGGATAGGTGACCGGAGGCCGGCACCTTTCCCTTTACAACACTACTGAC--  
34 TGAATAGGCACCGGAGGCCGGCACCTTTC--TTTACAA-----  
29 TGAATAGGTGACCGGAGGCCGGCACCTTTCCCTTTACAACACTACTGAC--  
39 TGAATAGGTGACCGGAGGCCGGCACCTTTC-----  
40 TGAATAGGTGACCGGAGGCCGGCGCCTTTCATTAC-----  
58 TGAATAGGTGACCGGAGGCCGGCACCTTT-----  
59 TGAATAGGTGACCGGAGGCCGGCACCTTTCTTTA-----  
81 TGAATAGGTGACCGGAGGCCGGCACCTTTCTTTA-----  
82 TGAATAGGTGACCGGAGGCCGGCACCTTTCCTTTA-----  
83 TGAATAGGTGACCGGAGGCCGGCACCTTTCTTTA-----  
84 TGAATAGGTGACCGGAGGCCGGCACCTTT-----  
130 TGAATAGGCACCGGAGGCCGGCGCCTTTCCTTTA-----  
131 TGAATAGGCACCGGAGGCCGGCGCCTTTCCTTT-----  
51 TGAATAGGTGACCGGAGGCCGGCACCTTTCCTTT-----  
52 TGAATAGGTGACCGGAGGCCGGCACCTTTCCTT-----  
53 TGAATAGGTGACCGGAGGCCGGCGCCTTTCCTTT-----  
67 TGAATAGGTGACCGGAGGCCGGCACCTTTCCTTT-----  
66 TGAATAGGTGACCGGAGGCCGGCACCTTTCCTTT-----  
107 TGAATAGGTGACCGGAGGCCGGCACCTTTCCTTT-----  
105 TGAATAGGTGACCGGAGGCCGGCACCTTTCCTTT-----  
106 TGAATAGGTGACCGGAGGCCGGCACCTTTCCTTT-----  
65 TGAATAGGTGACCGGAGGCCGGCACCTTTCCTTT-----  
41 TGAATAGGCACCGGAGGCCGGCGCCTTTCCTTTA-----  
43 TGAATAGGTGACCGGAGGCCGGCGCCTTTC-----  
98 TGAACAGGTGACCGGAGGTCGGCACCTTTCCTACAA-----  
44 TGAATAGGCACCGGAGGCCGGCGCCTTTC-----  
108 TGAATAGGTGACCGGAGGCCGGCACCTTTCCTTT-----  
109 TGAATAGGTGACCGGAGGCCGGCACCTTTCCTTT-----  
68 TGAATAGGTGACCGGAGGCCGGCACCTTTCCTTT-----  
54 TGAATAGGCACCGGAGGCCGGCACCTTTCCTACAA-----  
56 TGAATAGGTGACCGGAGGCCGGCACCTTTCCTTTA-----  
74 TGAATAGGTGACCGGAGGCCGGCACCTTTCCTTT-----  
55 TGAACAGGTGACCGGAGGCCGGCACCTTTCCTTTA-----  
57 TGAATAGGTGACCGGAGGCCGGCACCTTT-----  
80 TGAATAGGTGACCGGAGGCCGGCACCTTTCCTTTA-----  
72 TGAATAGGTGACCGGAGGCCGGCACCTTTCCTTT-----  
110 TGAATAGGTGACCGGAGGCCGGCACCTTTCCTTT-----  
73 TGAATAGGTGACCGGAGGCCGGCACCTTT-----  
69 TGAATAGGTGACCGGAGGCCGGCACCTTTCCTTT-----  
70 TGAATAGGTGACCGGAGGCCGGCACCTTTCCTTT-----  
71 TGAATAGGTGACCGGAGGCCGGCACCTTTCCTTT-----  
111 GGAATAGGTGACCGGAGGCCGGCGCCTTTCCTTTA-----  
112 TGAATAGGCACCGGAGGCCGGCACCTTTCCTTTA-----  
113 TGAATAGGTGACCGGAGGCCGGCACCTTTCCTTTA-----  
76 TGAATAGGCACCGGAGGCCGGCGCCTTT-----  
77 TGAATAGGCACCGGAGGCCGGCACCTTTCCTTTTACAA-----  
75 TGAATAGGTGACCGGAGGCCGGCGCCTTTCCTTTA-----  
114 TGAATAGGTGACCGGAGGCCGGCACCTTTCCTTTA-----  
78 TGAATAGGTGACCGGAGGCCGGCACCTTTCCTTTA-----  
115 TGAATAGGTGACCGGAGGCCGGCACCTTTCCTTTA-----  
116 TGAATAGGTGACCGGAGGCCGGCACCTTTCCTTTA-----  
60 TGAATAGGTGACCGGAGGCCGGCACCTTTCCTTTACA-----  
216 TGAATAGGCACCGGAGGCCGGCGCCTTTCCTT-----  
166 TGAATAGGTGACCGGAGGCCGGCACCTTTCCTTTA-----  
215 TGAATAGGTGACCGGAGGCCGGCGCCTTTCCTTTACCATT-----  
103 TGAATAGGTGACCGGAGGCCGGCACCTTTCCTTT-----

42 TGAGTAGGCGACCGGAGGCCGGCACCTTT-----  
46 TGAATAGGCGACCGGAGGCCGGCGCCTTTCC-----  
47 TGAATAGGCGACCGGAGGCCGGCGCCTTTCCATTATAACTACTGAC-----  
45 TGAATAGGCGACCGGAGGCCGGCGCCTTTCC-----  
62 TGAACAGGCGACCGGAGGCCGGCACCTTTCTCTACAA-----  
86 TGAATAGGTGACCGGAGGCCGGCACCTTT-----  
88 TGAATAGGTGACCGGAGGCCGGCACCTTTCTTTTA-----  
87 TGAATAGGTGACCGGAGGCCGGCACCTTT-----  
135 TGAATAGGTGACCGGAGGCCGGCACCTTTCTTTTA-----  
85 TGAATAGGTGACCGGAGGCCGGCACCTTT-----  
134 TGAATAGGTGACCGGAGGCCGGCACCTTTCTTTTA-----  
117 TGAATAGGTGACCGGAGGCCGGCACCTTTCTTTTA-----  
118 TGAATAGGTGACCGGAGGCCGGCACCTTTCTTTTA-----  
199 TGAATAGGTGACCGGAGGCCGGCGCCTTTTCTCTAACCATTA-----  
200 TGAATAGGCGACCGGAGGCCGGCGCCTTTTCTTTTA-----  
119 TGAATAGGTGACCGGAGGCCGGCGCCTTTCTTTTA-----  
198 TGAATAGGTGACCGGAGGCCGGCACCTTTCTTTTA-----  
207 TGAATAGGTGACCGGAGGCCGGCACCTTTCTTTTA-----  
219 TGAATAGGCGACCGGAGGCCGGCACCTTT-----  
206 TGAATAGGCGACCGGAGGCCGGCACCTTT-----  
121 TGAATAGGCGACCGGAGGCCGGCGCCTTTTCTTTAACCATTA-----  
201 TGAATAGGCGACCGGAGGCCGGCGCCTTTCTTTTA-----  
122 TGAATAGGCGACCGGAGGCCGGCGCCTTTTCTTTAACCATTA-----  
120 TGAATAGGCGACCGGAGGCCGGCGCCTTTTCTTTAACCATTA-----  
202 TGAATAGGCGACCGGAGGCCGGCGCCTTTCTTTTA-----  
203 TGAATAGGCGACCGGAGGCCGGCGCCTTTCTTTTA-----  
171 TGAATAGGCGACCGGAGGCCGGCGCCTTTCTTTTA-----  
172 TGAATAGGCGACCGGAGGCCGGCGCCTTTCTTTTA-----  
123 TGAATAGGCGACCGGAGGCCGGCGCCTTT-----  
124 TGAATAGGCGACCGGAGGCCGGCGCCTTTCTTTTA-----  
128 TGAATAGGTGACCGGAGGCCGGCACCTTTTCTTTTA-----  
129 TGAATAGGTGACCGGAGGCCGGCGCCTTT-CTTTTA-----  
177 TGAATAGGTGACCGGAGGCCGGCGCCTTT-CTTTT-----  
209 TGAATAGGTGACCGGAGGCCGGCGCCTTTT-C-----  
178 TGAATAGGCGACCGGAGGCCGGCGCCTTT-CTTT-----  
208 TGAATAGGTGACCGAAGGCCGGCACCTTT-CTTTTA-----  
136 TGAATAGGTGACCGGAGGCCGGCACCTTTC-TTTTA-----  
264 TGCATAGGCGACCGGAGGCCGGCGCCTTTC-CTTTAC-----  
89 TGAATAGGTGACCGGAGGCCGGCGCCTTTC-CTTT-----  
95 TGAATAGGTGACCGGAGGCCGGCACCTTTC-TTTTA-----  
158 TGGATAGGCGACCGGAGGCCGGCACCTTTC-TTTTA-----  
211 TGAATAGGTGACCGGAGGCCGGCGCCTTT-----  
147 TGAATAGGTGACCGGAGGCCGGCACCTTTC-TTTTA-----  
163 TGAATAGGTGACCGGAGGCCGGCACCTTTC-TTTTACA-----  
96 TGAATAGGTGACCGGAGGCCGGCACCTTTC-CTTTACAA-----  
159 TGAATAGGTGACCGGAGGCCGGCGCCTTTC-----  
137 TGAATAGGTGACCGGAGGCCGGCACCTTTC-TTTTA-----  
176 TGAATAGGTGACCGGAGGCCGGCACCTTTC-TTTTA-----  
138 TGAATAGGTGACCGGAGGCCGGCACCTTTC-TTTTA-----  
140 TGAATAGGTGACCGGAGGCCGGCACCTTTC-TTTTA-----  
149 TGAATAGGTGACCGGAGGCCGGCACCTTTC-TTTTA-----  
188 TGAATAGGTGACCGGAGGC-GGCACCTTTC-CTTT-----  
139 TGAATAGGTGACCGGAGGCCGGCACCTTTC-TTTTA-----  
187 TGAATAGGTGACCGGAGGCCGGCACCTTTC-TTTTA-----  
186 TGAATAGGTGACCGGAGGCCGGCACCTTTC-TTTTA-----  
184 TGAATAGGTGACCGGAGGCCGGCACCTTTC-TTTTA-----  
185 TGAATAGGTGACCGGAGGCCGGCACCTTTC-TTTTA-----  
97 TGAATAGGTGACCGGAGGTCGGCACCTTTC-TCTACAA-----  
164 TGAATAGGTGACCGGAGGCCGGCACCTTTCCTTTTACAA-----  
165 TGAATAGGTGACCGGAGGCCGGCACCTTTC-TTTTA-----  
90 TGGATAGGCGACCGGAGGCCGGCGCCTTTCTTT-----  
91 TGGATAGGCGACCGGAGGCCGGCACCTTTCTTTTA-----

243 TGAATAGGCACCGGAGGCCGGCGCCTTTCCTT-----  
242 TGAATAGGCACCGGAGGCCGGCGCCTTTCCTT-----  
252 TGAATAGGCACCGGAGGCCGGCGCTTTTC-----  
194 TGAATAGGTGACCGGAGGCCGGCACCTTTCCTTTA-----  
195 TGAATAGGTGACCGGAGGCCGGCACCTTTCCTTTA-----  
169 TGAATAGGCACCGGAGGCCGGCGCCTTTTCTTTAACCATTA-----  
170 TGAATAGGCACCGGAGGCCGGCGCCTTTTCTTTAACCATTA-----  
196 TGAATAGGTGACCGGAGGCCGGCACCTTTCCTTTA-----  
197 TGAATAGGTGACCGGAGGCCGGCACCTTTCCTTTA-----  
231 TGAATAGGCACCGGAGGCCGGCGCCTTTCCTTTAACCATTA-----  
232 TGAATAGGCACCGGAGGCCGGCGCCTTTCCTT-----  
230 TGAATAGGCACCGGAGGCCGGCGCCTTTC-----  
233 TGAATAGGCACCGGAGGCCGGCGCCTTT-----  
234 TGAATAGGCACCGGAGGCCGGCGCCTTTCCTT-----  
235 TGAATAGGCACCGGAGGCCGGCGCCTTTCCTT-----  
229 TGAATAGGCACCGGAGGCCGGCGCCTTTC-----  
265 TGGATAGGCACCGGAGGCCGGCGCCTTTCATTAC-----  
282 TGAATAGGCACCGGAGGCCGGCGCCTTTCATT-AC-----  
256 TGAATAGGCACCGGAGGCCGGCACCTTTC-----  
49 TGAATAGGTGACCGGAGGCCGGCACCTTTCCTTT-----  
50 TGAATAGGTGACCGGAGGCCGGCACCTTTCCTTT-----  
48 TGGATAGGTGACCGGAGGCCGGCACCTTTCCTTT-----  
63 TGAATAGGTGACCGGAGGCCGGCACCTTTCCTTT-----  
104 TGAATAGGTGACCGGAGGCCGGCACCTTTCCTTT-----  
93 TGAATAGGTGACCGGAGGCCGGCACCTTTCCTTTA-----  
94 TGAATAGGTGACCGGAGGCCGGCACCTTTCCTTTA-----  
92 TGAATAGGTGACCGGAGGCCGGCACCTTTCCTTT-----  
167 TGAATAGGTGACCGGAGGCCGGCACCTTTCCTTTA-----  
168 TGAATAGGTGACCGGAGGCCGGCGCCTTTTCTTTAACCATTA-----  
64 TGAATAGGTGACCGGAGGCCGGCACCTTTCCTTT-----  
181 TGAATAGGCACCGGAGGCCGGCACCTTTCCTTTA-----  
141 TGAATAGGTGACCGGAGGCCGGCGCCTTTCCTTT-----  
152 TGAATAGGTGACCGGAGGCCGGCGCCTTTCCTTT-----  
144 TGAATAGGTGACCGGAGGCCGGCACCTTTCCTTTA-----  
150 TGAATAGGTGACCGGAGGCCGGCACCTTTCCTTTA-----  
151 TGAATAGGTGACCGGAGGCCGGCACCTTTCCTTTA-----  
145 TGAATAGGTGACCGGAGGCCGGCACCTTTCCTTTA-----  
156 TGAATAGGTGACCGGAGGCCGGCACCTTTCCTTTA-----  
148 TGAATAGGTGACCGGAGGCCGGCACCTTTCCTTTA-----  
143 TGAATAGGTGACCGGAGGCCGGCACCTTTCCTTTA-----  
155 TGAATAGGTGACCGGAGGCCGGCACCTTTCCTTTA-----  
154 TGAATAGGTGACCGGAGGCCGGCACCTTTCCTTTA-----  
189 TGAATAGGTGACCGGAGGCCGGCACCTTT-----  
142 TGGATAGGCACCGGAGGCCGGCACCTTTCCTTTA-----  
153 TGGATAGGCACCGGAGGCCGGCACCTTTCCTTTA-----  
190 TGAATAGGTGACCGGAGGCCGGCGCCTTTC-----  
99 TGAACAGGTGACCGGAGGCCGGCACCTTTCCTTTA-----  
191 TGAATAGGCACCGGAGGCCGGCGCTTTTC-----  
192 TGAATAAGCGACCGGAGGCCGGCGCTTTTC-----  
160 TGAATAAGCGACCGGAGGCCGGCGCTTTTC-----  
180 TGAATAGGCACCGGAGGCCGGCGCCTTTCCTTT-----  
213 TGAATAGGCACCGGAGGCCGGCGCCTTTCCTTTAACCATTA-----  
100 TGAATAGGTGACCGGAGGCCGGCACCTTTCCTTTA-----  
101 TGAATAGGTGACCGGAGGCCGGCACCTTTCCTTTA-----  
146 TGAATAGGTGACCGGAGGCCGGCACCTTTCCTTTA-----  
157 TGAATAGGTGACCGGAGGCCGGCGCCTTTCCTTT-----  
162 TGAATAGGTGACCGGAGGCCGGCACCTTTCCTTTACA-----  
182 TGAATAGGTGACCGGAGGCCGGCACCTTTCCTTTA-----  
183 TGAATAGGTGACCGGAGGCCGGCACCTTTCCTTTA-----  
102 TGAATAGGTGACCGGAGGCCGGCACCTTTCCTTT-----  
161 TGAATAAGCGACCGGAGGCCGGCACCTTTCCTTTACA-----  
193 TGAATAAGCGACCGGAGGCCGGCACCTTTCCTTTA-----

227 TGAATAAGCGACCGGAGGCCGGCGCTTTTC-----  
 254 TGTATAGGCACCGGAGGCCGGCGCCTTTCCTT-----  
 214 TGAATAGGCACCGGAGGCCGGCACCTT-----  
 179 TGGATAGGCACCGGAGGCCGGCGCCTTTCTTTGAATTA-----  
 212 TGAATAGGCACCGGAGGCCGGCGCCTT-----  
 241 TGGATAGGCACCGGAGGCCGGCGCCTTTCCTT-----  
 210 TGAATAAGCGACCGGAGGCCGGCACCTTTCCTTT-----  
 223 TGAATAGGCACCGGAGGCCGGCACCTTTCCTTT-----  
 239 TGAATAGGCACCGGAGGCCGGCGCCTTTTC-----  
 262 TGAATAGGCACCGGAGGCCGGCGCCTTTCATTAAC TATTA-----  
 240 TGAATAAGCGACCGGAGGCCGGCGCCTTTCCTTTAC-----  
 284 TGATTAGGCACCGGAGGCCGGCGCCTTTCATTAC-----  
 251 TGGATAGGCACCGGAGGCCGGCGCCTTTCCTT-----  
 263 TGAATAGGCACCGGAGGCCGGCGCCTTTCATTTA-----  
 250 TGAATAGGCACCGGAGGCCGGCGCCTTTCCTTTAC-----  
 224 TGAATAGGTGACCGGAGGCCGGCGCCTTTC-----  
 237 TGAATAGGTGACCGGAGGCCGGCACCTT-----  
 281 TGAATAGGCACCGGAGGCCGGCGCCTTTCCTTT-----  
 221 TGAATAGGCACCGGAGGCCGGCACCTTTCCTTTA-----  
 226 TGGATAAGCGACCGGAGGCCGGCGCCTTTTC-----  
 253 TGGATAAGCGACCGGAGGCCGGCGCCTTTCATTAAC TATTA-----  
 286 TGGATAAGCGACCGGAGGCCGGCGCCTTTCCTTT-----  
 279 TGAATAGGCACCGGAGGCCGGCGCCTTTCCTT-----  
 287 TGAATAGGCACCGGAGGCCGGCGCCTTTC-----  
 267 TGAATAGGCACCGGAGGCCGGCGCCTTTCCTT-----  
 291 TGAATAGGCACCGGAGGCCGGCGCCTTTCATTAAC TATTA-----  
 301 TGAATAGGCACCGGAGGCCGGCGCCTTTCATTCAACTATTACCC-----  
 269 TGAATAGGCACCGGAGGCCGGCGCCTTTCATTAC-----  
 289 TGAATAGGCACCGGAGGCCGGCGCCTTTC-----  
 302 TGTGTAGGTGACCGGAGGCCGGCGCCTTTCCTT-----  
 274 TGAATAGGCACCGGAGGCCGGCGCCTTTCCTTT-----  
 275 TGAATAGGCACCGGAGGCCGGCGCCTTTCCTTTACCATTA-----  
 297 TGAATAGGCACCGGAGGCCGGCGCCTTTCCTTTA-----  
 304 CGAATAGGCACCGGAGGCCGGCGCCTTTC-----  
 270 TGAATAGGCACCGGAGGCCGGCGCCTTTCATTAC-----  
 298 TGAATAGGCACCGGAGGCCGGCGCCTTTCATTAC-----  
 283 TGAATAGGCACCGGAGGTGCGGCGCCTTTCATTA-----  
 300 TGAGTAGGCACCGGAGGCCGGCGCCTTTCATTAC-----  
 271 TGAATAGGCACCGGAGGCCGGCGCCTTTCCTT-----  
 272 TGAATAGGCACCGGAGGCCGGCGCCTTTCCTT-----  
 273 TGAATAGGCACCGGAGGCCGGCGCCTTTCCTTT-----  
 285 TGAATAGGCACCGGAGGCCGGCGCCTTTC-----  
 303 TGAATAGGCACCGGAGGCCGGCGCCTTTCCTTTAC-----  
 309 TGAATAGGTGACCGGAGGCCGGCACCTTTCCTTTA-----  
 312 TGAATAGGTGACCGGAGGCCGGCACCTTTCCTTTA-----  
 313 TGAATAGGTGACCGGAGGC-GGCACCTTTCCTTTAC-----  
 316 TGAATAGGTGACCGGAGGCCGGCACCTTTCCTTT-----  
 318 TGAATAGGTGACCGGAGGCCGGCACCTTTCCT-----  
 314 TGAATAGGTGACCGGAGGCCGGCACCTTTCCTTTA-----  
 315 TGAATAGGTGACCGGAGGCCGGCACCTTTCCTT-----  
 317 TGAATAGGTGACCGGAGGCCGGCACCTTTCCTT-----

---
